# Supplementary material
Source: publisher figshare collection journal article supplement (https://acs.figshare.com/ndownloader/files/3637845)
Supplement: Supplementary file 1 [file 3637845]

## Supporting information

### **Trifluoromethylation of Propargylic Halides and Trifluoroacetates using (Ph<sub>3</sub>P)<sub>3</sub>Cu(CF<sub>3</sub>) Reagent**

Tony S. N. Zhao, and Kálmán J. Szabó\*

Stockholm University, Arrhenius Laboratory, Department of Organic Chemistry  
SE-106 91 Stockholm, Sweden. E-mail: [kalman@organ.su.se](mailto:kalman@organ.su.se). Web: [www.organ.su.se/ks](http://www.organ.su.se/ks).  
Fax: +46-8-15 49 08

#### **Table of contents**

|                                                              |            |
|--------------------------------------------------------------|------------|
| <b>Experimental procedures and compound characterization</b> | <b>S1</b>  |
| <b>NMR Spectra</b>                                           | <b>S8</b>  |
| <b>References</b>                                            | <b>S58</b> |

## Experimental procedures and compound characterization

**General information.** Copper reagent **1a**<sup>1</sup> and starting materials **2f**<sup>2</sup>, **2g**<sup>3</sup>, **3a-d**<sup>4</sup> and **4**<sup>5</sup> were prepared according to literature procedures. All other chemicals were obtained from commercial suppliers and were used without further purification. All reactions were performed under air unless otherwise stated. <sup>1</sup>H NMR, <sup>13</sup>C NMR and <sup>19</sup>F NMR spectra were recorded in CDCl<sub>3</sub> on a 400 MHz instrument. All <sup>1</sup>H NMR spectra are measured relative to the signals for residual CHCl<sub>3</sub> (7.26 ppm) and all <sup>13</sup>C NMR spectral data are reported relative to CDCl<sub>3</sub> (77.16 ppm). For <sup>19</sup>F NMR, α,α,α-trifluorotoluene was used as an external standard (-63.73 ppm). All column chromatography was performed using silica gel (35-70 microns). GC analysis was performed using Varian 3800 instrument, equipped with a FID detector using a CP7503 column with a 1.8 mL/min N<sub>2</sub> flow. HRMS data were recorded on a micrOTOF instrument using ESI and APCI technique.

**General method for trifluoromethylation of propargylic alcohol derivatives.** Complex **1a** (912 mg, 0.100 mmol) and propargyl derivatives **2** or **3** (0.1 mmol) were dissolved in dry THF (0.4 ml) and the reaction mixture was stirred for 16 hours at the indicated temperatures (Table 1). Then, the reaction mixture was filtered and concentrated under reduced pressure followed by purification using column chromatography with pentane as eluent.

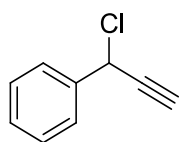

**(1-Chloroprop-2-yn-1-yl)benzene (2a).** To a stirred solution of triphenylphosphine (864 mg, 3.29 mmol) in THF (3 mL) was added 1-phenylprop-2-yn-1-ol (360 mg, 2.27 mmol) in THF (3 mL). Subsequently, N-chlorosuccinimide (455 mg, 3.41 mmol) in THF (3 mL) was added dropwise to the solution over 10 min at 0 °C and the resulted reaction mixture was refluxed for 16 hours. Then, pentane was added and the precipitate was filtered off. The resulted solution was concentrated and the crude product was purified by flash column chromatography (pentane : EtOAc 10:1) and isolated as a colorless oil (259 mg, 76% yield). The spectral data obtained for **2a** are in agreement with the literature values.<sup>4</sup> <sup>1</sup>H NMR (400 MHz, CDCl<sub>3</sub>) δ 2.86 (1H, d, *J* = 2.4 Hz), 5.66 (1H, d, *J* = 2.4 Hz), 7.33-7.55 (5H, m). <sup>13</sup>C NMR (100 MHz, CDCl<sub>3</sub>) δ 49.0, 76.8, 80.6, 127.5, 128.9, 129.2, 138.0.

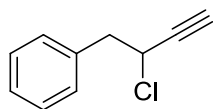

**(2-Chlorobut-3-yn-1-yl)benzene (2e).** This compound was synthesized according to the procedure described above for of **2a** using 1-phenylbut-3-yn-2-ol (0.3318 g, 2.27 mmol). The crude product was purified by flash column chromatography (pentane) and isolated as a yellow oil (359 mg, 96% yield).  $^1\text{H}$  NMR (400 MHz,  $\text{CDCl}_3$ )  $\delta$  2.61 (1H, d,  $J = 2.3$  Hz), 3.23 (1H, dd,  $J = 12.1, 7.1$  Hz), 3.27 (1H, dd,  $J = 12.1, 7.1$  Hz), 4.67 (1H, td,  $J = 7.2, 2.3$  Hz), 7.27-7.74 (5H, m).  $^{13}\text{C}$  NMR (100 MHz,  $\text{CDCl}_3$ )  $\delta$  45.1, 48.1, 75.2, 81.5, 127.4, 128.4, 129.6, 136.0. HRMS (ESI $^-$ ):  $m/z$  calcd. for  $[\text{C}_{10}\text{H}_8\text{Cl}]^-$  163.0320/165.0292, found 163.0330/165.0305.

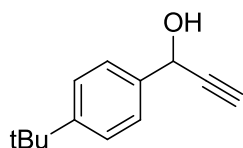

**1-(4-(tert-Butyl)phenyl)prop-2-yn-1-ol.** To a stirred solution of 4-(tert-butyl)benzaldehyde (1.62 mg, 10.0 mmol) in THF (10 ml) at 0 °C was added ethynyl magnesium bromide (0.5 M in THF, 25 ml, 12.5 mmol) dropwise over 5 min. After 4 hours the reaction was quenched with saturated aqueous  $\text{NH}_4\text{Cl}$  solution (20 ml), extracted with EtOAc (3x 15 ml) and washed with brine. The organic phase was dried over  $\text{MgSO}_4$ , filtered, evaporated and the crude alcohol was purified via column chromatography (pentane: EtOAc 10:1) and was isolated as a colorless oil (1.58 g, 84% yield).  $^1\text{H}$  NMR (400 MHz,  $\text{CDCl}_3$ )  $\delta$  1.33 (9H, s), 2.13 (1H, d,  $J = 6.1$  Hz), 5.45 (1H, dd,  $J = 5.9, 1.9$  Hz), 7.39 – 7.52 (4H, m).  $^{13}\text{C}$  NMR (100 MHz,  $\text{CDCl}_3$ )  $\delta$  31.3, 34.6, 64.3, 74.6, 83.6, 125.7, 126.4, 137.1, 151.7. HRMS (ESI $^+$ ):  $m/z$  calcd. for  $[\text{C}_{13}\text{H}_{16}\text{NaO}]^+$  211.1093, found 211.1097.

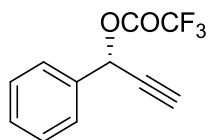

**(R)-1-Phenylprop-2-yn-1-yl 2,2,2-trifluoroacetate (3a).** This compound was prepared according to the literature procedure by Davies and co-workers<sup>4</sup> using commercially available (Aldrich) (*R*)-1-phenylprop-2-yn-1-ol (500 mg, 3.783 mmol). The crude product was purified by flash chromatography (pentane/EtOAc 10:1) and isolated as a colorless oil (845 mg, 98% yield, 90% ee). Spectral data is in agreement with the literature values reported by Davies and co-workers<sup>4</sup> for the racemic form. GC analysis: (*R*)-form  $R_f = 77.2$  min and (*S*)-form 78.7 min using 0.1 °C/min heating gradient in the temperature range between 47 °C to 59 °C.

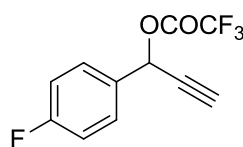

**1-(4-Fluorophenyl)prop-2-yn-1-yl 2,2,2-trifluoroacetate (3b).** This compound was synthesized according to the literature procedure by Davies and co-workers using 1-(4-fluorophenyl)prop-2-yn-1-ol (1.08 g, 7.20 mmol) as the alcohol component.<sup>4</sup> The crude product was purified by chromatography

(pentane/EtOAc 10:1) and isolated as a colorless oil (1.45 g, 82% yield).  $^1\text{H}$  NMR (400 MHz,  $\text{CDCl}_3$ )  $\delta$  2.83 (1H, d,  $J = 2.2$  Hz), 6.50 (1H, d,  $J = 2.2$  Hz), 7.08-7.52 (4H, m).  $^{13}\text{C}$  NMR (100 MHz,  $\text{CDCl}_3$ )  $\delta$  68.8, 77.5, 78.2, 112.9, 114.3 (q,  $J_{\text{CF}} = 286.6$  Hz), 116.1 (d,  $J_{\text{CF}} = 19.9$  Hz), 130.2 (d,  $J_{\text{CF}} = 9.0$  Hz), 156.3 (q,  $J_{\text{CF}} = 43.6$  Hz), 163.6 (d,  $J_{\text{CF}} = 249.1$  Hz).  $^{19}\text{F}$  NMR (376 MHz,  $\text{CDCl}_3$ )  $\delta$  -163.8 (tt,  $J_{\text{FH}} = 8.4, 5.2$  Hz), -74.9 (s). HRMS (ESI-):  $m/z$  calcd. for  $[\text{C}_{11}\text{H}_5\text{F}_4\text{O}_2]^-$  245.0231, found 245.0219.

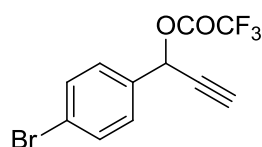

**1-(4-Bromophenyl)prop-2-yn-1-yl 2,2,2-trifluoroacetate (3c).** The compound was synthesized according to the literature procedure by Davies and co-workers<sup>4</sup> using 1-(4-bromophenyl)prop-2-yn-1-ol (1.05 g, 5.00 mmol) as the alcohol component. The crude product was purified by column chromatography (pentane/EtOAc 10:1) and isolated as a yellow oil (1.10 g, 72% yield).  $^1\text{H}$  NMR (400 MHz,  $\text{CDCl}_3$ )  $\delta$  2.83 (1H, d,  $J = 2.3$  Hz), 6.48 (1H, d,  $J = 2.3$  Hz), 7.60-7.41 (4H, m).  $^{13}\text{C}$  NMR (100 MHz,  $\text{CDCl}_3$ )  $\delta$  68.8, 77.2, 78.3, 114.3 (q,  $J_{\text{CF}} = 286.0$  Hz), 124.5, 126.6, 132.3, 133.1, 156.3 (q,  $J_{\text{CF}} = 43.3$  Hz).  $^{19}\text{F}$  NMR (376 MHz,  $\text{CDCl}_3$ )  $\delta$  -74.8 (s). HRMS (ESI-):  $m/z$  calcd. for  $[\text{C}_{11}\text{H}_5\text{BrF}_3\text{O}_2]^-$  304.9431/306.9411, found 304.9445/306.9425.

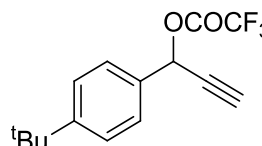

**1-(4-(tert-Butyl)phenyl)prop-2-yn-1-yl 2,2,2-trifluoroacetate (3d).** The compound was synthesized according to the literature procedure by Davies and co-workers using 1-(4-(tert-butyl)phenyl)prop-2-yn-1-ol (940 mg, 5.0 mmol) as the alcohol component.<sup>4</sup> The crude product was purified by flash column chromatography (pentane/EtOAc 10:1) and isolated as a colorless oil (739 mg, 52% yield). The product hydrolyses on silica and the alcohol was isolated as a byproduct.  $^1\text{H}$  NMR (400 MHz,  $\text{CDCl}_3$ )  $\delta$  1.33 (9H, s), 2.79 (1H, d,  $J = 2.4$  Hz), 6.51 (1H, d,  $J = 2.2$  Hz), 7.42-7.52 (4H, m).  $^{13}\text{C}$  NMR (100 MHz,  $\text{CDCl}_3$ )  $\delta$  25.5, 31.1, 68.0, 77.2, 83.3, 114.9 (q,  $J_{\text{CF}} = 279.5$  Hz), 126.1, 127.8, 128.5, 153.3, 155.2, 185.6 (q,  $J_{\text{CF}} = 41.8$  Hz).  $^{19}\text{F}$  NMR (376 MHz,  $\text{CDCl}_3$ )  $\delta$  -75.9 (s). HRMS (ESI-):  $m/z$  calcd. for  $[\text{C}_{15}\text{H}_{14}\text{F}_3\text{O}_2]^-$  283.0951, found 283.0956.

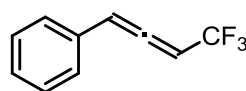

**(4,4,4-Trifluorobuta-1,2-dien-1-yl)benzene (5a).** This product was synthesized from **2a** and **3a** (entry 10, Table 1) using the above general method. Product **5a** was isolated as a colorless oil (12.8 mg, 68% from **2a**, 15.7 mg, 85% from **3a**).  $^1\text{H}$  NMR (400 MHz,  $\text{CDCl}_3$ )  $\delta$  5.89 (1H, app. quintett,  $J = 6.0$  Hz), 6.67 (1H, dq,  $J = 3.9$  Hz), 7.28-7.48 (5H, m).  $^{13}\text{C}$  NMR (100 MHz,  $\text{CDCl}_3$ )  $\delta$  89.7 (q,  $J = 39.3$  Hz), 101.3, 121.0, 127.5, 128.6, 129.0, 131.8, 207.0 (q,  $J_{\text{CF}} = 6.0$  Hz).  $^{19}\text{F}$  NMR (376 MHz,  $\text{CDCl}_3$ )

$\delta$  -60.2 (dd,  $J = 5.8, 3.8$  Hz). HRMS (ESI+):  $m/z$  calcd. for  $[C_{20}H_{15}F_6]^+$  369.1072, found 369.1076, corresponding to  $[2xM_{5a}+H]^+$ .

The enantiomerically enriched product was obtained using (*R*)-1-phenylprop-2-yn-1-yl 2,2,2-trifluoroacetate (90% ee) which was stirred at 4 °C for 16 hours. The product could be isolated as a colorless oil (12.7 mg, 70% yield, 89% ee). The ee value was determined by GC analysis using a 0.1 °C/min heating gradient in the temperature range between 50 °C to 55 °C. Based on the analysis of the racemic mixture the  $R_f$  values for the two enantiomers are 67.4 min and 70.3 min.

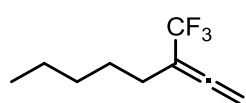

**3-(Trifluoromethyl)octa-1,2-diene (5b).** This product was synthesized from **2d** using the above general method. Product **5b** was isolated as colorless oil (12.1 mg, 67% yield).  $^1H$  NMR (400 MHz,  $CDCl_3$ )  $\delta$  0.84-0.97 (4H, m), 1.30-1.38 (3H, m), 1.46-1.54 (2H, m), 2.11 (2H, app. septet,  $J = 3.7$  Hz), 5.20 (2H, app. sextet,  $J = 3.6$  Hz).  $^{13}C$  NMR (100 MHz,  $CDCl_3$ )  $\delta$  13.9, 22.3, 25.7, 26.9, 31.1, 81.8, 98.7 (q,  $J_{CF} = 33$  Hz), 123.9 (q,  $J_{CF} = 136$  Hz), 206.5 (q,  $J_{CF} = 4.4$  Hz).  $^{19}F$  NMR (376 MHz,  $CDCl_3$ )  $\delta$  -64.3 (app. t.,  $J_{FH} = 3.7$  Hz). HRMS (ESI+):  $m/z$  calcd. for  $[C_9H_{14}F_3]^+$  179.1042, found 179.1039.

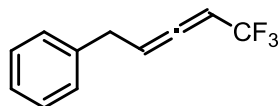

**(5,5,5-Trifluoropenta-2,3-dien-1-yl)benzene (5c).** The product was synthesized from **2e** using the general method. Product **5c** was isolated as a colorless oil (18.4 mg, 92% yield).  $^1H$  NMR (400 MHz,  $CDCl_3$ )  $\delta$  3.49 (2H, dd,  $J = 7.4, 2.8$  Hz), 5.47 (1H, dqt,  $J = 17.8, 6.0, 3.0$  Hz), 5.86 (1H, dtq,  $J = 17.8, 7.5, 3.9$  Hz), 7.22-7.42 (5H, m.).  $^{13}C$  NMR (100 MHz,  $CDCl_3$ )  $\delta$  34.3, 86.3 (q,  $J_{CF} = 39.7$  Hz), 98.0, 126.8, 128.5, 128.6, 128.7, 133.6, 133.8, 138.2, 205.6.  $^{19}F$  NMR (376 MHz,  $CDCl_3$ )  $\delta$  -60.5 (dd,  $J_{FH} = 6.4, 4.1$  Hz). HRMS (ESI+):  $m/z$  calcd. for  $[C_{22}H_{19}F_6]^+$  397.1385, found 397.1391 corresponding to  $[2xM_{5c}+H]^+$ .

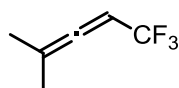

**1,1,1-Trifluoro-4-methylpenta-2,3-diene (5d).** The product was synthesized from **2f** using the above general method. Using  $^{19}F$  NMR, an NMR yield of 86% was calculated using **5a** as internal standard. The product could not be isolated because of volatility. The  $^{19}F$  NMR data is obtained by the analysis of the crude reaction mixture:  $^{19}F$  NMR (376 MHz,  $CDCl_3$ )  $\delta$  -60.8.

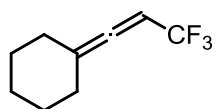

**(3,3,3-Trifluoroprop-1-en-1-ylidene)cyclohexane (5e).** This product was synthesized from **2g** using the general method. Product **5e** was isolated as a colorless oil (15.4 mg, 87% yield).  $^1\text{H}$  NMR (400 MHz,  $\text{CDCl}_3$ )  $\delta$  1.50 - 1.68 (6H, m), 2.12 - 2.28 (4H, m), 5.26 (1H, qp,  $J$  = 5.8, 5.0 Hz).  $^{13}\text{C}$  NMR (100 MHz,  $\text{CDCl}_3$ )  $\delta$  25.7, 26.9, 30.3, 30.3, 83.2 (q,  $J_{\text{CF}}$  = 38.3 Hz), 110.1, 121.7, 124.4, 199.0 (q,  $J_{\text{CF}}$  = 5.7 Hz).  $^{19}\text{F}$  NMR (376 MHz,  $\text{CDCl}_3$ )  $\delta$  -60.7 (d,  $J_{\text{FH}}$  = 5.8 Hz).

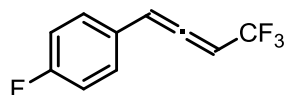

**1-Fluoro-4-(4,4,4-trifluorobuta-1,2-dien-1-yl)benzene (5f).** The product was obtained from **3b** using the general method as a colorless oil (17.5 mg, 86% yield).  $^1\text{H}$  NMR (400 MHz,  $\text{CDCl}_3$ )  $\delta$  5.88 (1H, app. pentet,  $J$  = 5.9 Hz), 6.61 - 6.68 (1H, m), 7.04 - 7.30 (4H, m).  $^{13}\text{C}$  NMR (100 MHz,  $\text{CDCl}_3$ )  $\delta$  90.8 (q,  $J_{\text{CF}}$  = 39.0 Hz), 101.3, 116.9 (d,  $J_{\text{CF}}$  = 21.0 Hz), 123.2 (q,  $J_{\text{CF}}$  = 270.9 Hz), 127.7 (q,  $J_{\text{CF}}$  = 1.4 Hz), 130.0 (d,  $J_{\text{CF}}$  = 8.3 Hz), 163.7 (d,  $J_{\text{CF}}$  = 246.9 Hz), 207.6 (qd,  $J_{\text{CF}}$  = 5.8, 2.8 Hz).  $^{19}\text{F}$  NMR (376 MHz,  $\text{CDCl}_3$ )  $\delta$  -112.5 (m), -60.3 (dd,  $J_{\text{FH}}$  = 5.5, 3.2 Hz). HRMS (ESI-):  $m/z$  calcd. for  $[\text{C}_{10}\text{H}_5\text{F}_4]^-$  201.0322, found 201.0322.

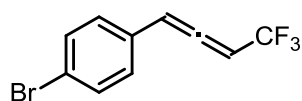

**1-Bromo-4-(4,4,4-trifluorobuta-1,2-dien-1-yl)benzene (5g).** This product was synthesized from **3c** using the above general method. Product **5g** was isolated as colorless oil (16.7 mg, 63% yield). The spectral data is in agreement with the literature values.<sup>6</sup>  $^1\text{H}$  NMR (400 MHz,  $\text{CDCl}_3$ )  $\delta$  5.89 (1H, app. pentet,  $J$  = 5.9 Hz), 6.63 (1H, dq,  $J$  = 7.4, 3.4 Hz), 7.13 - 7.50 (4H, m).  $^{13}\text{C}$  NMR (100 MHz,  $\text{CDCl}_3$ )  $\delta$  89.5 (q,  $J_{\text{CF}}$  = 40.0 Hz), 100.9, 114.5, 121.5 (q,  $J_{\text{CF}}$  = 270.0 Hz), 122.9, 128.8, 133.7, 206.7 (q,  $J_{\text{CF}}$  = 5.8 Hz).  $^{19}\text{F}$  NMR (376 MHz,  $\text{CDCl}_3$ )  $\delta$  -60.2 (dd,  $J_{\text{FH}}$  = 5.8, 3.8 Hz).

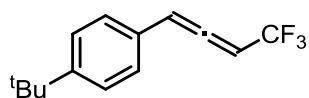

**1-(tert-Butyl)-4-(4,4,4-trifluorobuta-1,2-dien-1-yl)benzene (5h).** This product was synthesized from **3d** using the above general method. Product **5h** was isolated as a colorless oil (14.9 mg, 58% yield).  $^1\text{H}$  NMR (400 MHz,  $\text{CDCl}_3$ )  $\delta$  1.35 (9H, s), 5.87 (1H, app. quintet,  $J$  = 5.9 Hz), 6.67 (1H, dq,  $J$  = 7.7, 3.5 Hz), 7.27 - 7.43 (4H, m).  $^{13}\text{C}$  NMR (100 MHz,  $\text{CDCl}_3$ )  $\delta$  31.2, 34.7, 89.5 (q,  $J_{\text{CF}}$  = 39.3 Hz), 101.0, 122.4 (q,  $J_{\text{CF}}$  = 271.6 Hz), 125.9, 127.3, 127.8 (q,  $J_{\text{CF}}$  = 1.2 Hz), 151.9, 207.0 (q,  $J_{\text{CF}}$  = 6.2 Hz).  $^{19}\text{F}$  NMR (376 MHz,  $\text{CDCl}_3$ )  $\delta$  -60.3 (app. t,  $J_{\text{FH}}$  = 4.9 Hz). HRMS (ESI+):  $m/z$  calcd. for  $[\text{C}_{28}\text{H}_{31}\text{F}_6]^+$  481.2324, found 481.2331 corresponding to  $[2x\text{M}_{5\text{h}}+\text{H}]^+$ .

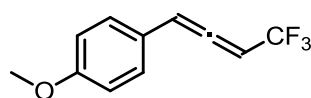

**1-(tert-Butyl)-4-(4,4,4-trifluorobuta-1,2-dien-1-yl)benzene (5i).**

The trifluoroacetate of **4** decomposed under purification. Therefore **4** was reacted with trifluoroacetic anhydride prior to the trifluoromethylation reaction and the formed trifluoroacetate was used without purification. To a screw top vial were added **4** (0.1 mmol, 16.2 mg), dry THF (0.4 ml), DBU (0.12 mmol, 1.2 eq., 18.7 mg) and trifluoroacetic anhydride (0.14 mmol, 1.4 eq., 29.4 mg). The reaction mixture was stirred for 20 minutes, then **1a** (0.1 mmol) was added and stirring was continued for further 16 hours at ambient room temperature (22 °C). Subsequently, the reaction mixture was filtered, concentrated and purified by column chromatography using pentane as eluent. Product **5i** was obtained as colorless oil (11.1 mg, 52% yield). <sup>1</sup>H NMR (400 MHz, CDCl<sub>3</sub>) δ 3.82 (3H, s), 5.85 (1H, app. quintett, *J* = 5.9 Hz), 6.63 (1H, dq, *J* = 7.7, 3.4 Hz), 6.84 – 7.28 (4H, m). <sup>13</sup>C NMR (100 MHz, CDCl<sub>3</sub>) δ 55.4, 89.5 (q, *J*<sub>CF</sub> = 39.2 Hz), 100.9, 114.5, 122.4 (q, *J*<sub>CF</sub> = 270.2 Hz), 128.8, 133.7 (q, *J*<sub>CF</sub> = 20.0 Hz), 206.8 (q, *J*<sub>CF</sub> = 5.8 Hz). <sup>19</sup>F NMR (376 MHz, CDCl<sub>3</sub>) δ -60.3 (dd, *J*<sub>FH</sub> = 6.0, 4.1 Hz). HRMS (ESI<sup>+</sup>): *m/z* calcd. for [C<sub>11</sub>H<sub>10</sub>F<sub>3</sub>O]<sup>+</sup> 215.0678, found 215.0693.

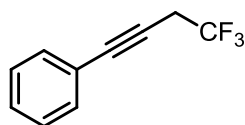

**(4,4,4-Trifluorobut-1-yn-1-yl)benzene (6a).** This product was synthesized from **2a** (entry 2, Table 1), **2b** (entry 3, Table 1) and from **3a** (entry 10, Table 1) using the above general method. Product **6a** was

isolated as a colorless oil (15.3 mg, 82% from **2a**, 13.7 mg, 74% from **2b**, 13.7 mg, 74% from **3a**). <sup>1</sup>H NMR (400 MHz, CDCl<sub>3</sub>) δ 3.27 (2H, q, *J* = 9.6 Hz), 7.28 – 7.51 (5H, m). <sup>13</sup>C NMR (100 MHz, CDCl<sub>3</sub>) δ 27.0 (app. d, *J*<sub>CF</sub> = 34.6 Hz), 77.4, 100.5, 111.0, 119.3, 125.5, 129.3, 131.7. <sup>19</sup>F NMR (376 MHz, CDCl<sub>3</sub>) δ -66.5 (t, *J*<sub>FH</sub> = 9.4 Hz).

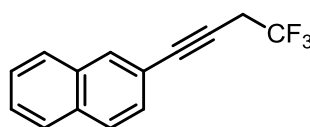

**2-(4,4,4-Trifluorobut-1-yn-1-yl)naphthalene (6b).** This product was synthesized from **2c** using the above general method. Product **6b** was isolated as yellow oil (20.3 mg, 86% yield). <sup>1</sup>H NMR (400

MHz, CDCl<sub>3</sub>) δ 3.44 (2H, q, *J* = 9.6 Hz), 7.39 – 8.32 (7H, m). <sup>13</sup>C NMR (100 MHz, CDCl<sub>3</sub>) δ 27.1 (q, *J*<sub>CF</sub> = 34.5 Hz), 29.7, 77.2, 82.6, 119.8, 122.9, 125.1, 125.9, 126.5, 127.0, 128.3, 129.2, 130.8, 133.1, 133.4. <sup>19</sup>F NMR (376 MHz, CDCl<sub>3</sub>) δ -66.3 (t, *J*<sub>FH</sub> = 9.8 Hz). HRMS (ESI<sup>+</sup>): *m/z* calcd. for [C<sub>14</sub>H<sub>10</sub>F<sub>3</sub>]<sup>+</sup> 235.0729, found 235.0733.

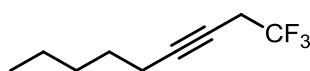

**1,1,1-Trifluoronon-3-yne (6c).** The product was synthesized from **2d** using the above general method. The product was isolated as

colorless oil (11.3 mg, 63% yield). <sup>1</sup>H NMR (400 MHz, CDCl<sub>3</sub>) δ 0.87 - 0.95 (3H, m),

1.23 – 1.42 (4H, m), 1.44-1.46 (2H, m), 2.20 (2H, tt,  $J = 7.0, 2.3$  Hz), 3.02 (2H, qt,  $J = 9.7, 2.4$  Hz).  $^{13}\text{C}$  NMR (100 MHz,  $\text{CDCl}_3$ )  $\delta$  13.9, 18.8, 22.2, 28.1, 31.0, 31.3, 74.9, 87.8, 127.8.  $^{19}\text{F}$  NMR (376 MHz,  $\text{CDCl}_3$ )  $\delta$  -67.1 (t,  $J_{\text{FH}} = 9.8$  Hz). HRMS (ESI+):  $m/z$  calcd. for  $[\text{C}_9\text{H}_{14}\text{F}_3]^+$  179.1042, found 179.1036.

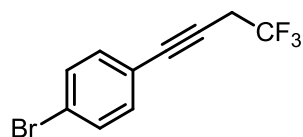

**1-Bromo-4-(4,4,4-trifluorobut-1-yn-1-yl)benzene (6d).** The

product was synthesized from **3c** using the general method. The product was isolated as a yellow oil (16.6 mg, 63% yield).  $^1\text{H}$  NMR (400 MHz,  $\text{CDCl}_3$ )  $\delta$  3.26 (2H, q,  $J = 9.6$  Hz), 7.28 – 7.50 (4H, m).  $^{13}\text{C}$  NMR (100 MHz,  $\text{CDCl}_3$ )  $\delta$  26.8 (q,  $J_{\text{CF}} = 34.6$  Hz), 77.2, 83.4, 121.1, 123.0, 125.4, 131.6, 133.3.  $^{19}\text{F}$  NMR (376 MHz,  $\text{CDCl}_3$ )  $\delta$  -66.4 (t,  $J_{\text{FH}} = 9.4$  Hz). HRMS (APCI-):  $m/z$  calcd. for  $[\text{C}_{10}\text{H}_5\text{BrF}_3]^-$  260.9532/260.9555, found 260.9540/261.9498.

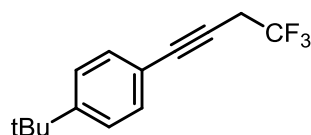

**1-(tert-Butyl)-4-(4,4,4-trifluorobut-1-yn-1-yl)benzene (6e).** The

product was synthesized from **3d** using the general method. The reaction was stirred at 50 °C. The product was isolated as a yellow oil (17.6 mg, 73% yield).  $^1\text{H}$  NMR (400 MHz,  $\text{CDCl}_3$ )  $\delta$  1.31 (9H, s), 3.26 (2H, q,  $J = 9.6$  Hz), 7.30 – 7.44 (4H, m).  $^{13}\text{C}$  NMR (100 MHz,  $\text{CDCl}_3$ )  $\delta$  26.6, 31.1, 34.8, 85.5, 100.5, 111.0, 119.2, 125.3, 131.6, 152.0.  $^{19}\text{F}$  NMR (376 MHz,  $\text{CDCl}_3$ )  $\delta$  -66.5 (t,  $J_{\text{FH}} = 9.8$  Hz). HRMS (ESI+):  $m/z$  calcd. for  $[\text{C}_{14}\text{H}_{16}\text{F}_3]^+$  241.1199, found 241.1205.



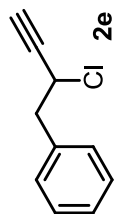

<sup>1</sup>H NMR (CDCl<sub>3</sub>, 400 MHz)

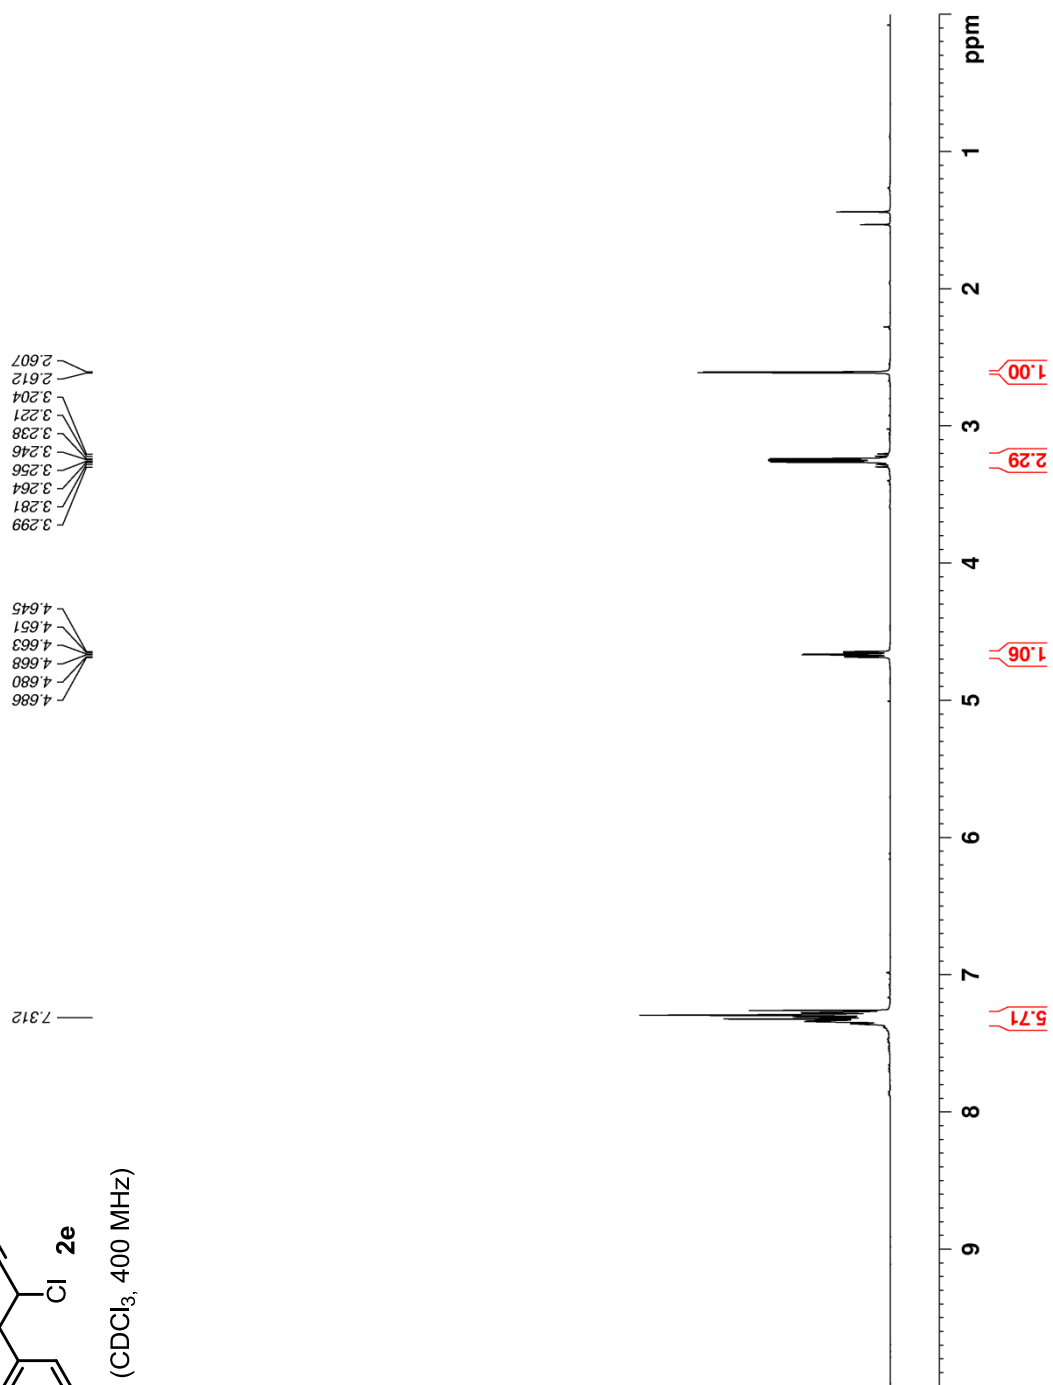

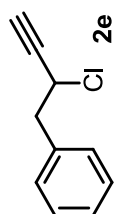

$^{13}\text{C}$  NMR ( $\text{CDCl}_3$ , 100 MHz)

48.126  
45.142

81.465  
75.213

136.041  
129.623  
128.437  
127.385

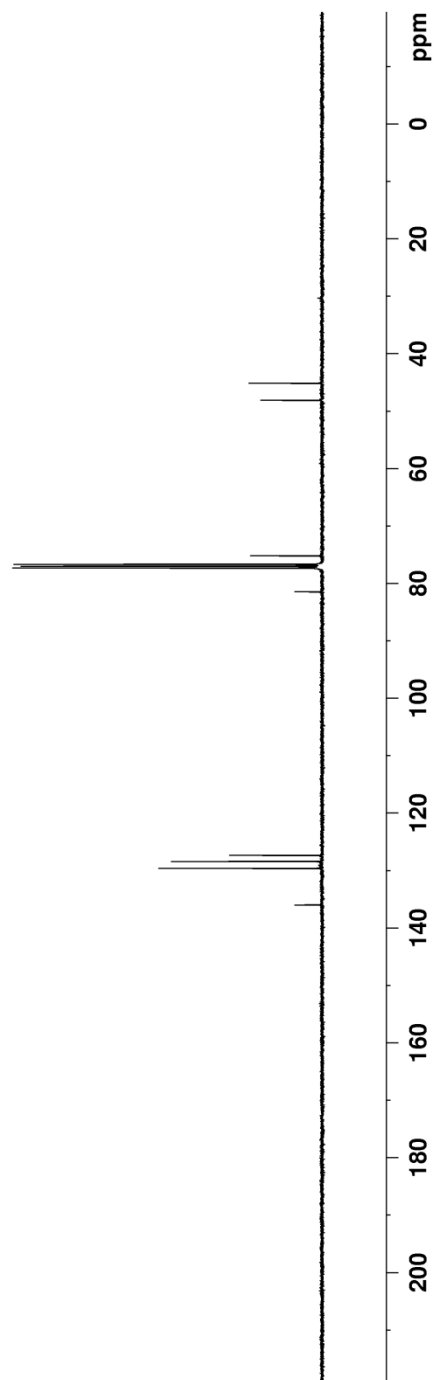

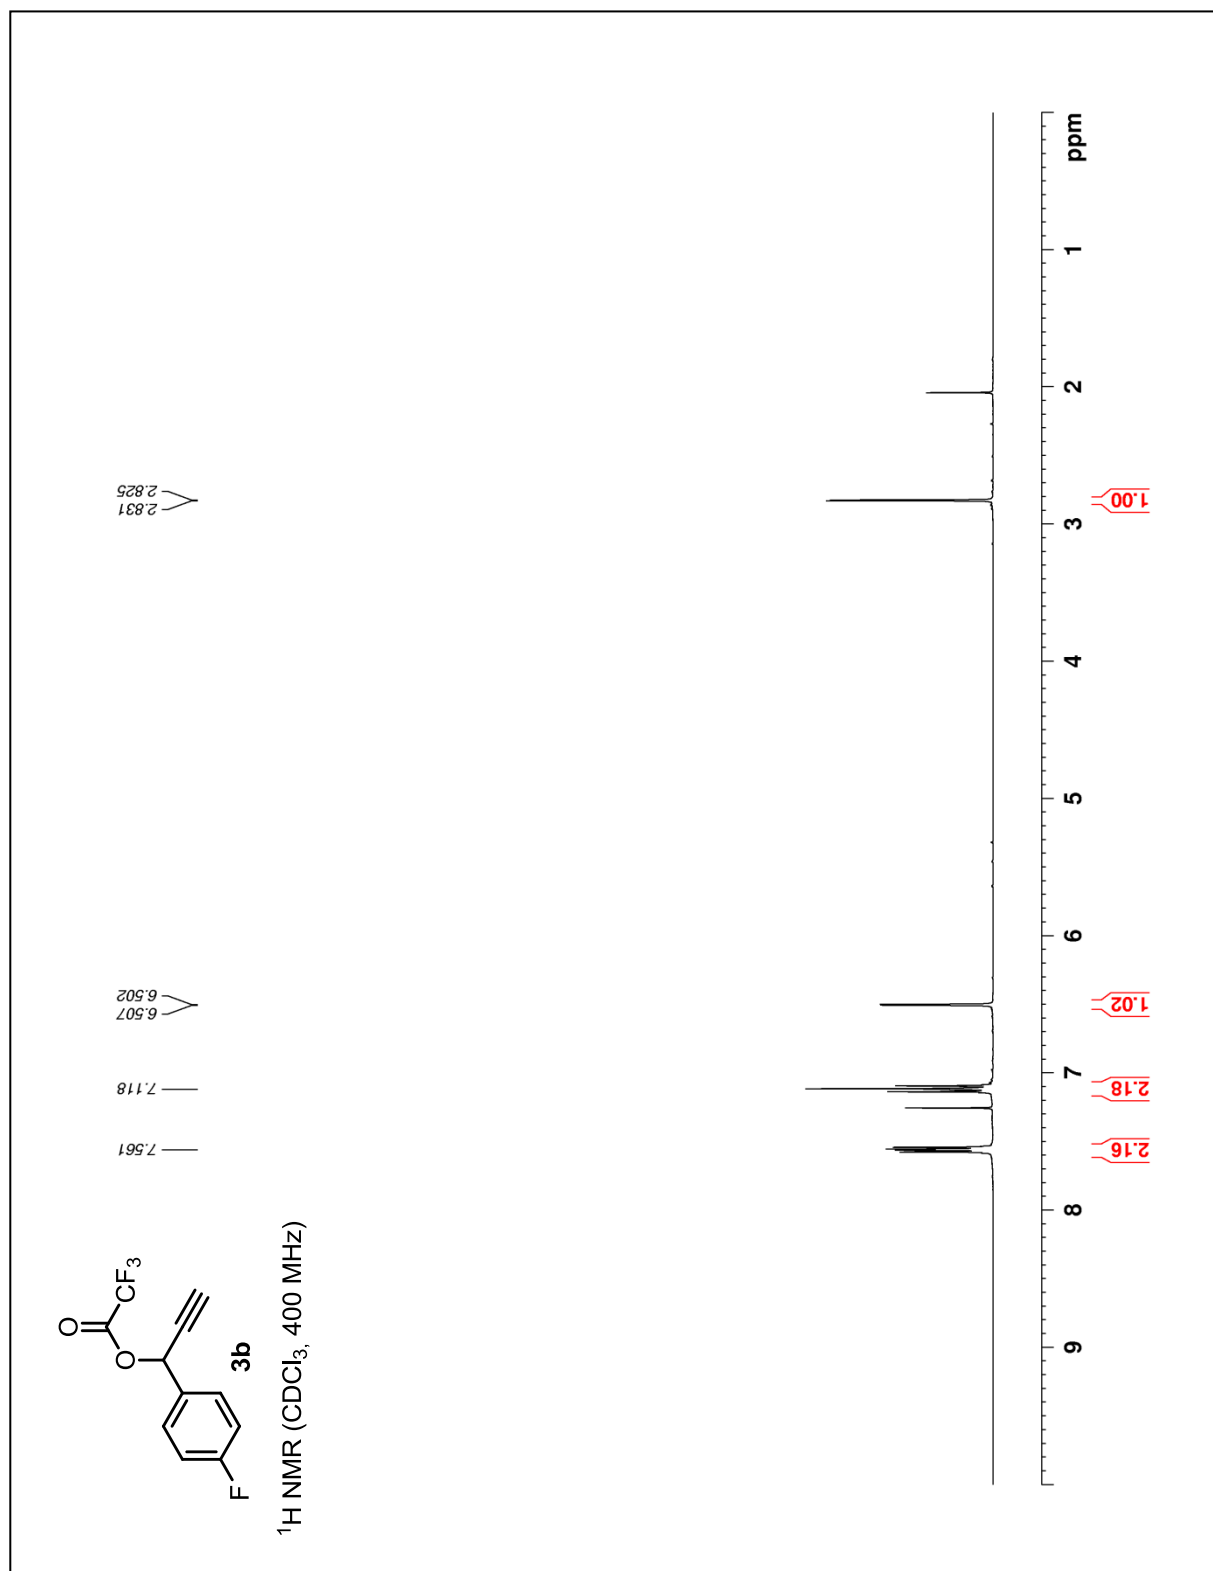

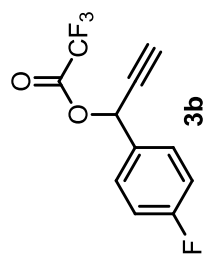

<sup>13</sup>C NMR (CDCl<sub>3</sub>, 100 MHz)

164.876  
162.390  
156.564  
156.135  
155.703  
130.206  
130.119  
116.193  
115.974  
112.875  
78.155  
77.504  
68.801

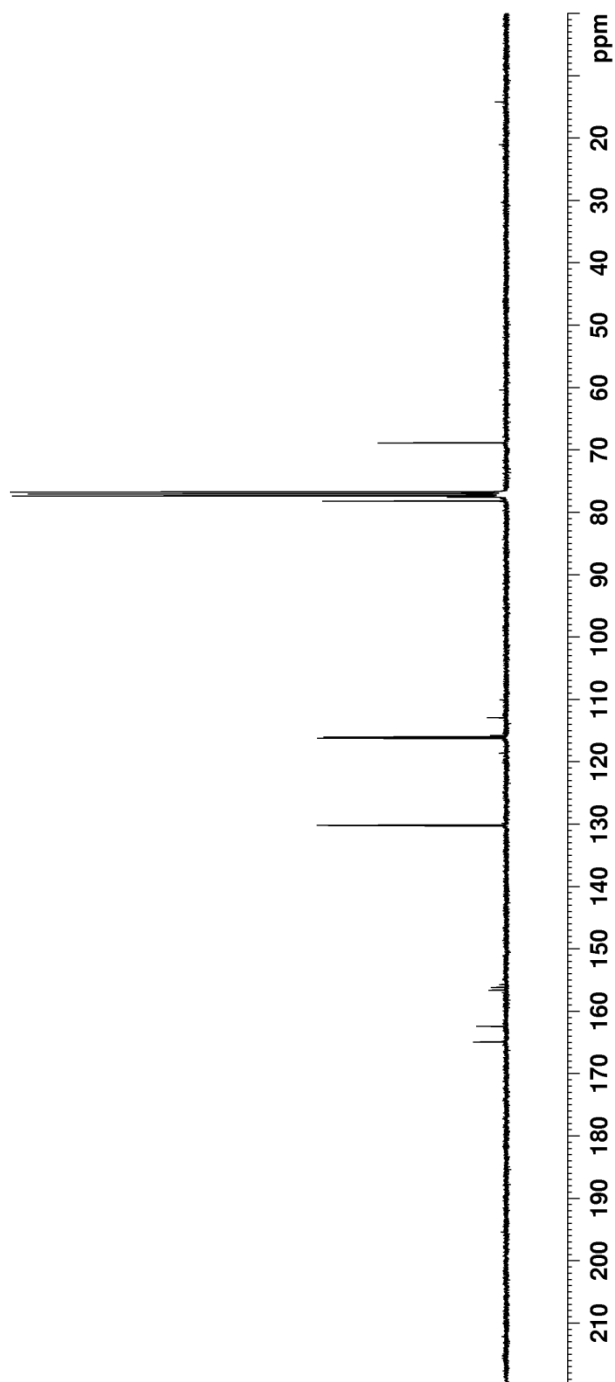

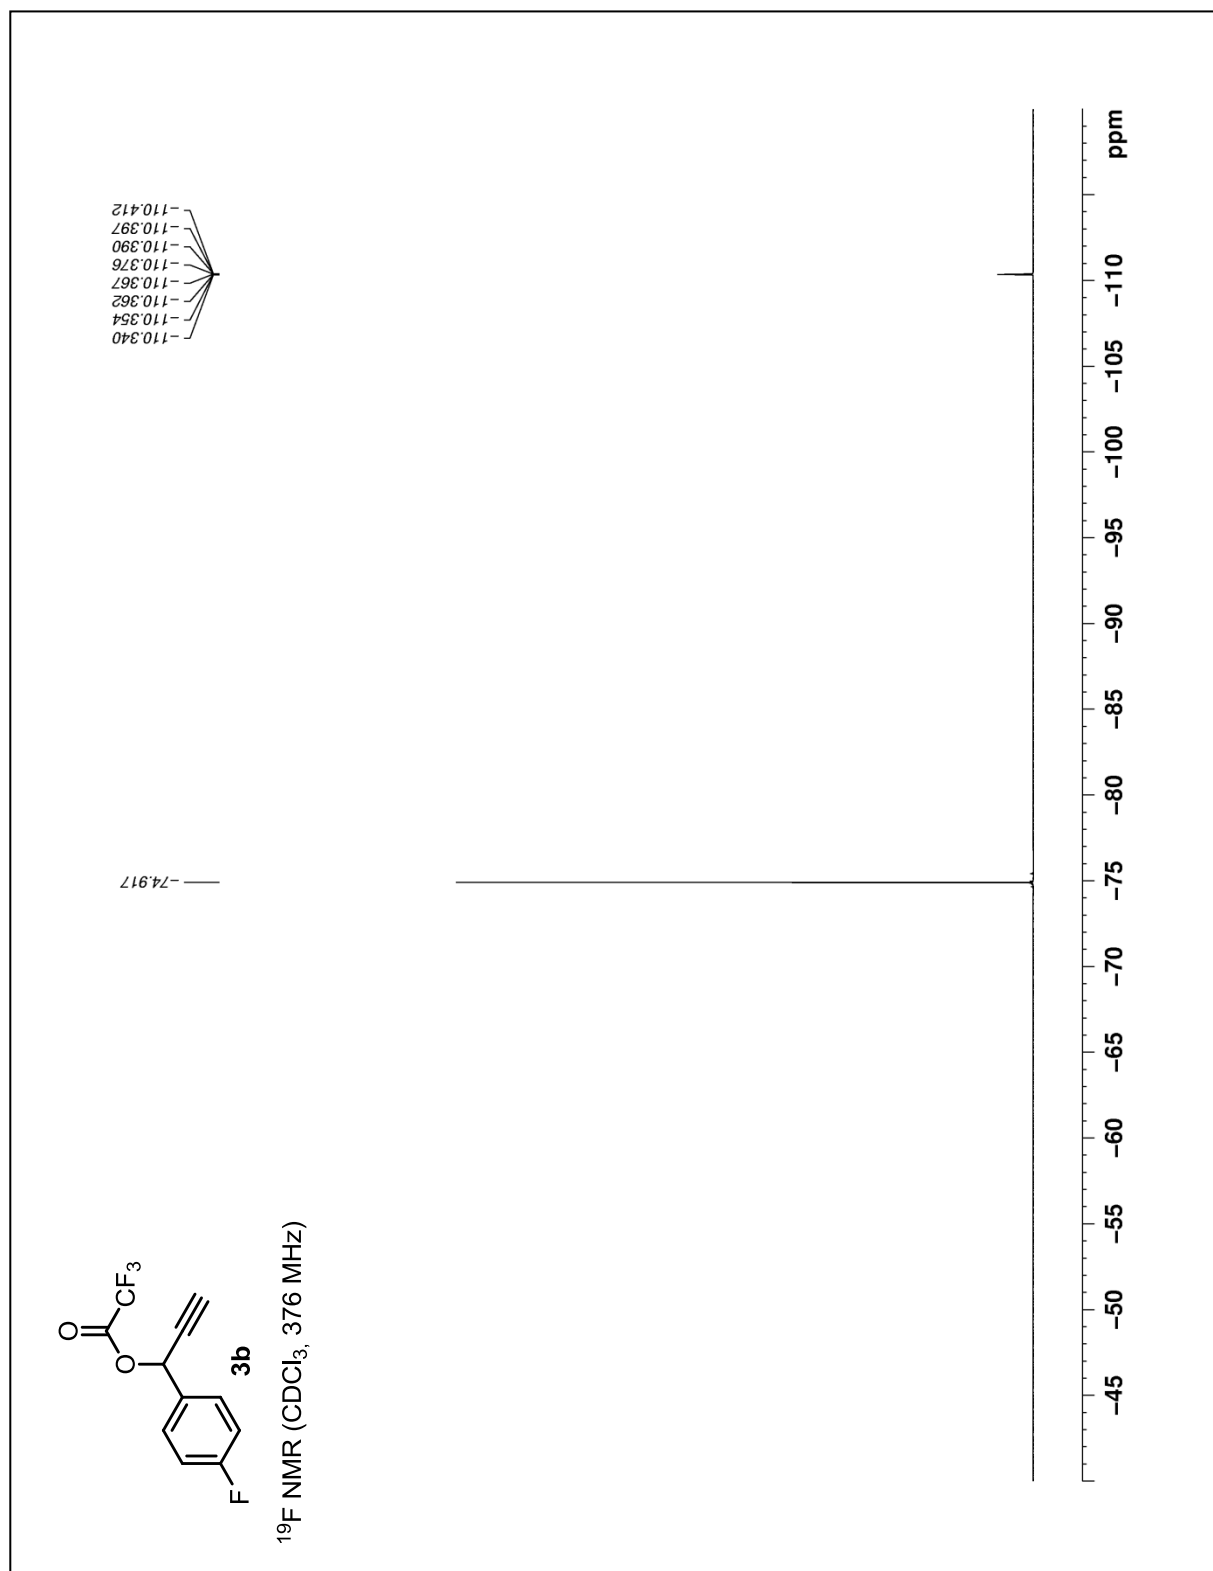

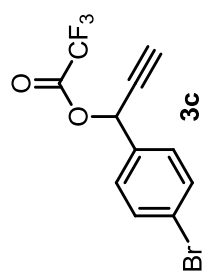

<sup>1</sup>H NMR (CDCl<sub>3</sub>, 400 MHz)

2.833  
2.827

6.478  
6.473

7.585  
7.563  
7.449  
7.428

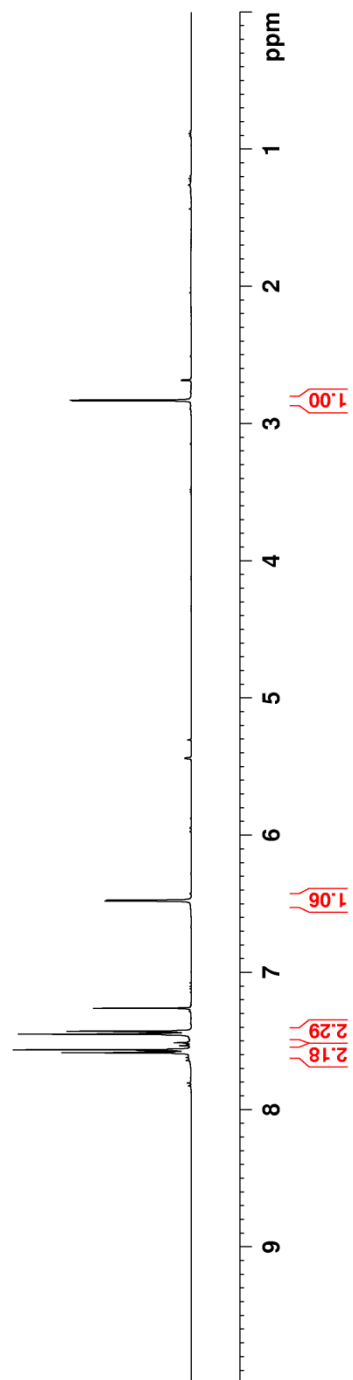

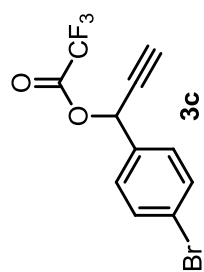

$^{13}\text{C}$  NMR ( $\text{CDCl}_3$ , 100 MHz)

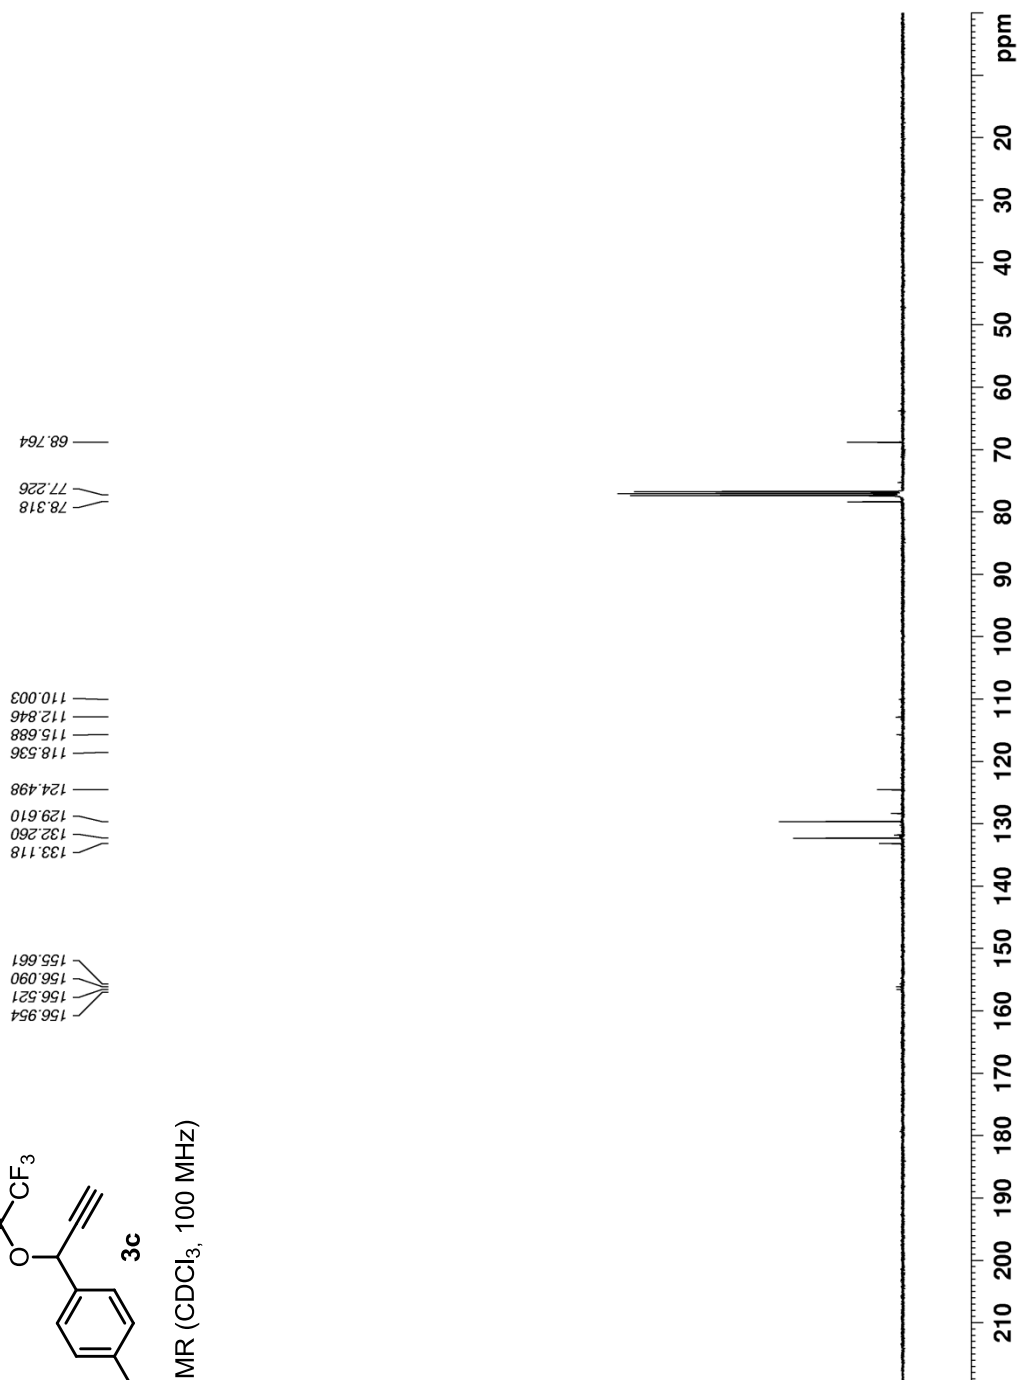

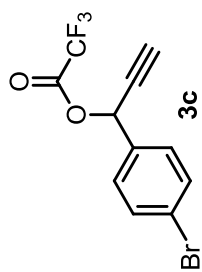

$^{19}\text{F}$  NMR ( $\text{CDCl}_3$ , 376 MHz)

— -74.863

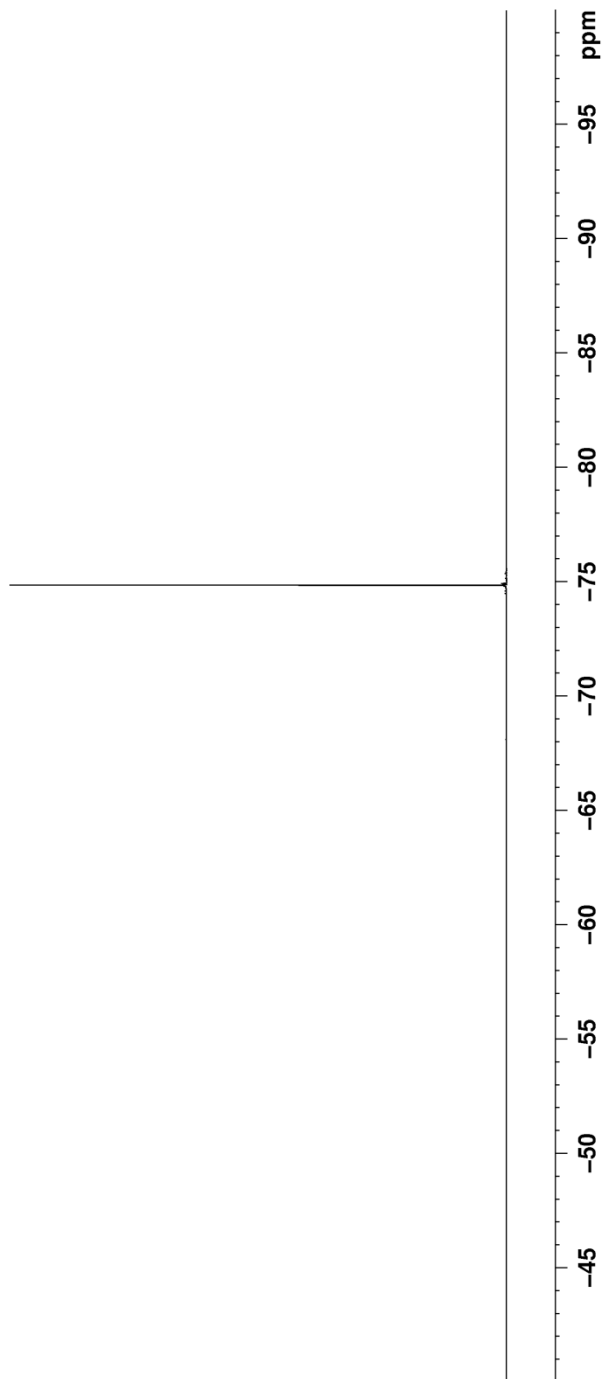



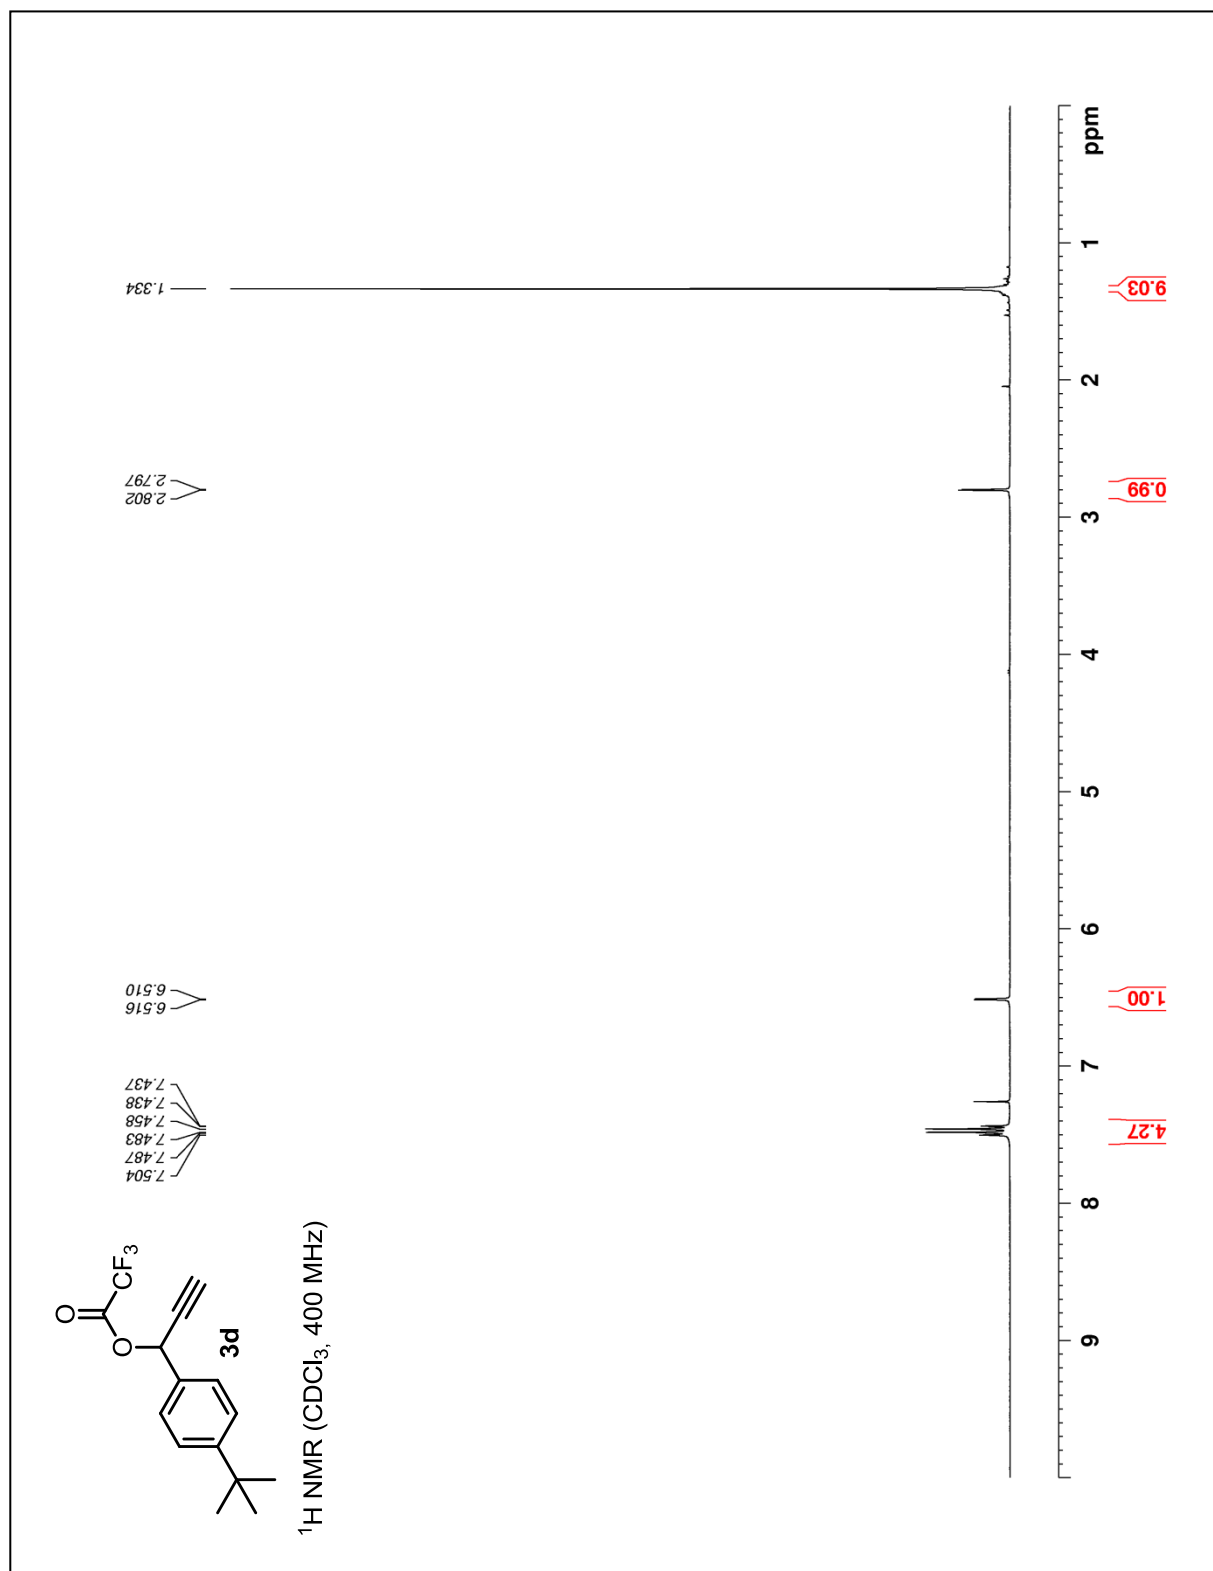

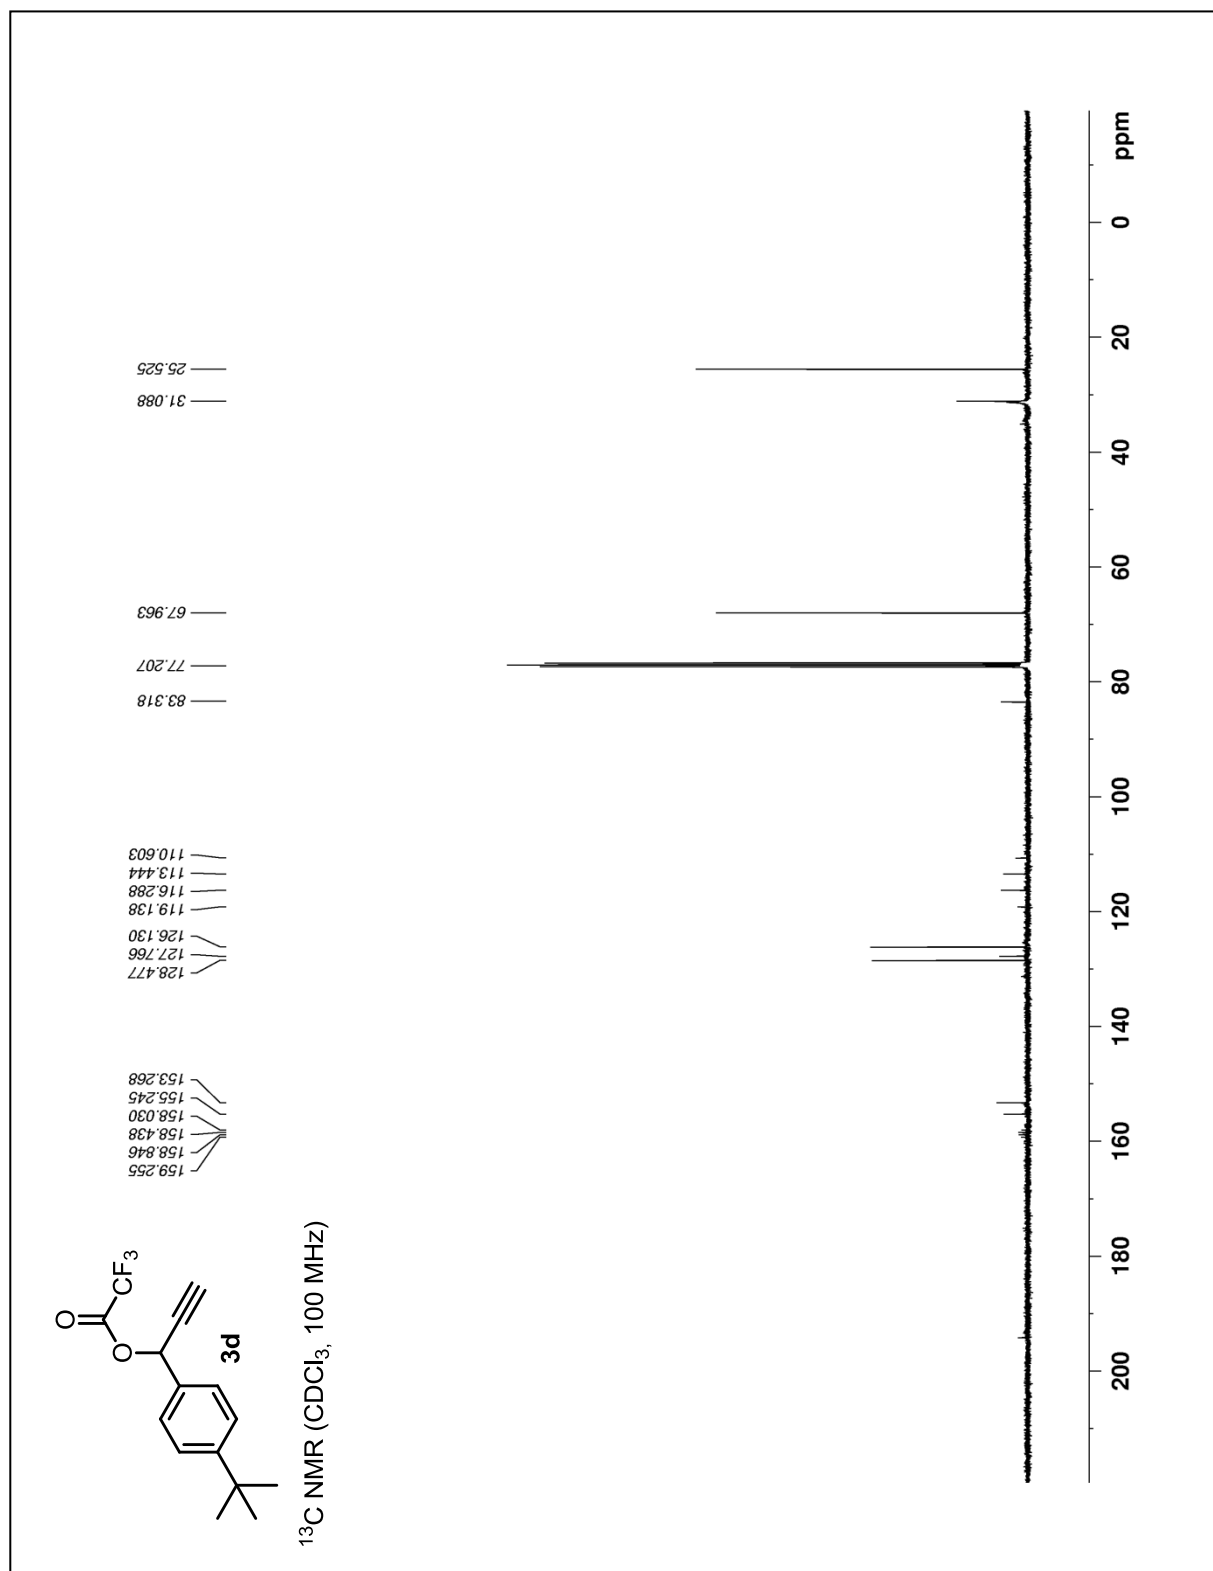

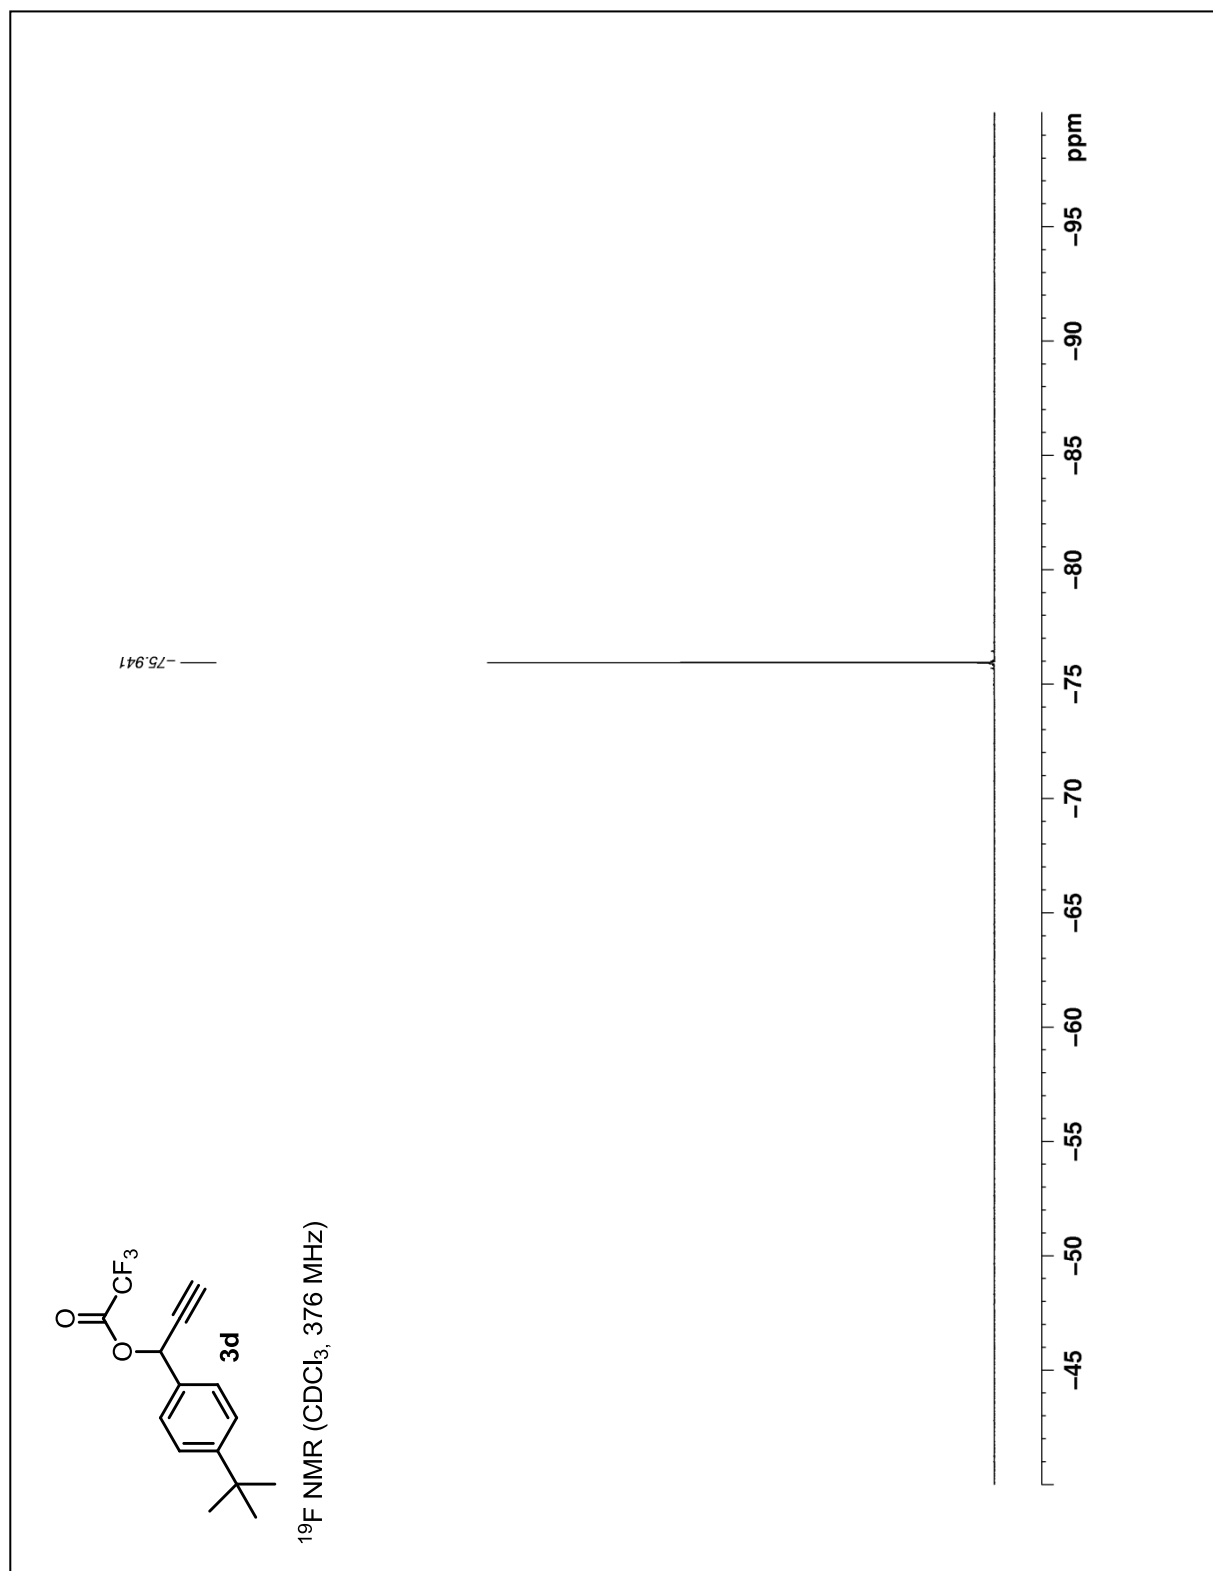

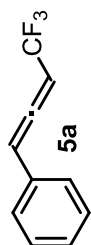

<sup>1</sup>H NMR (CDCl<sub>3</sub>, 400 MHz)

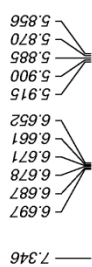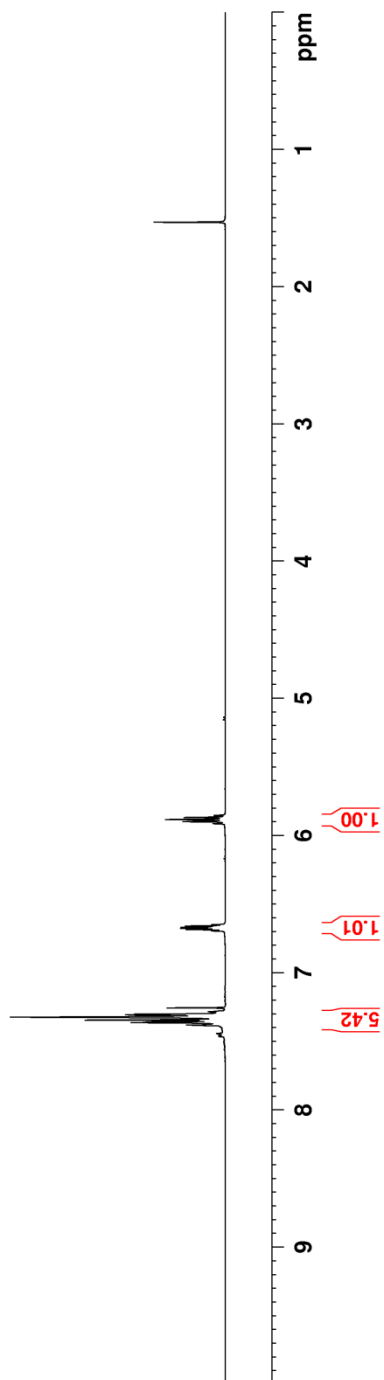

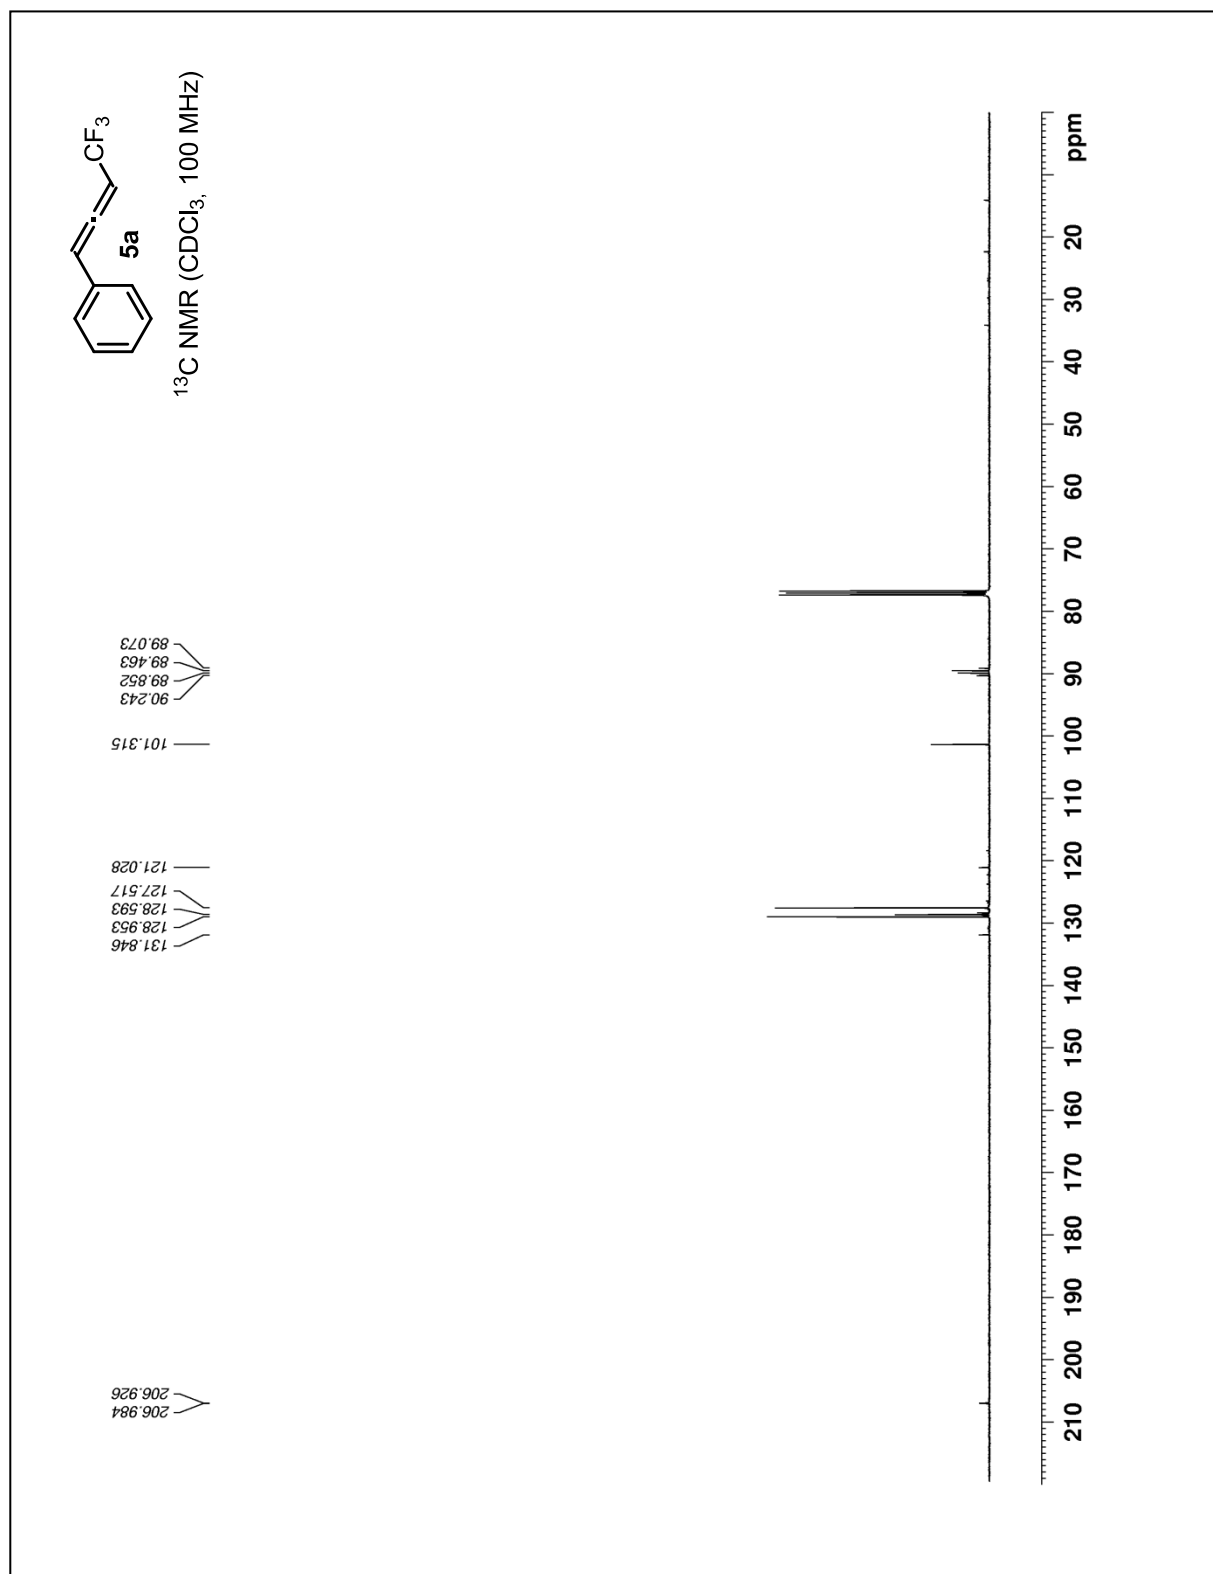

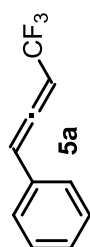

$^{19}\text{F}$  NMR ( $\text{CDCl}_3$ , 376 MHz)

60.233  
60.219  
60.208

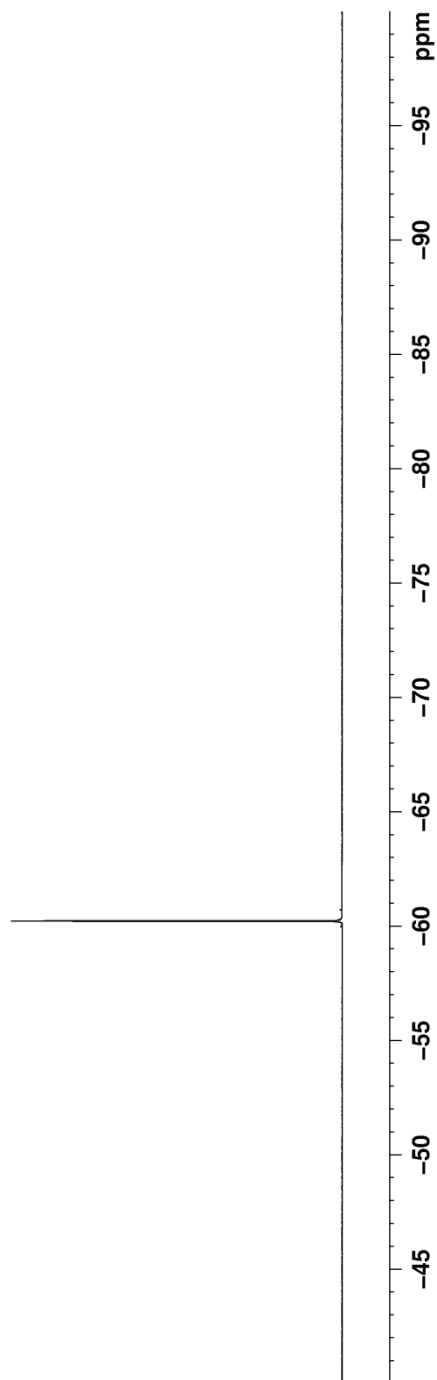

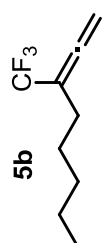

$^1\text{H}$  NMR ( $\text{CDCl}_3$ , 400 MHz)

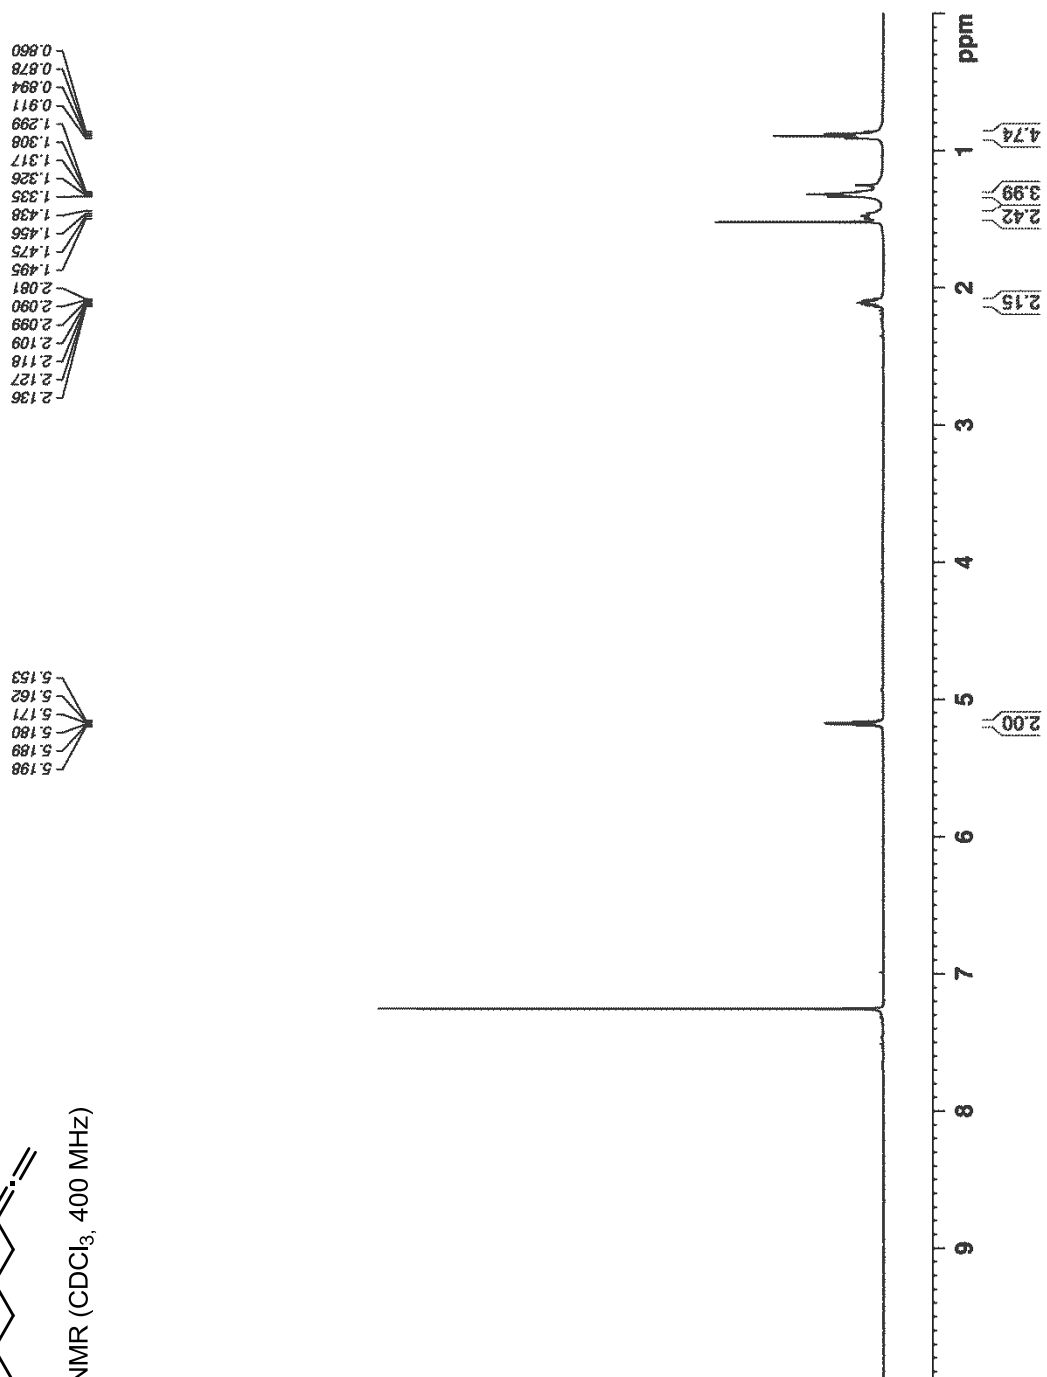

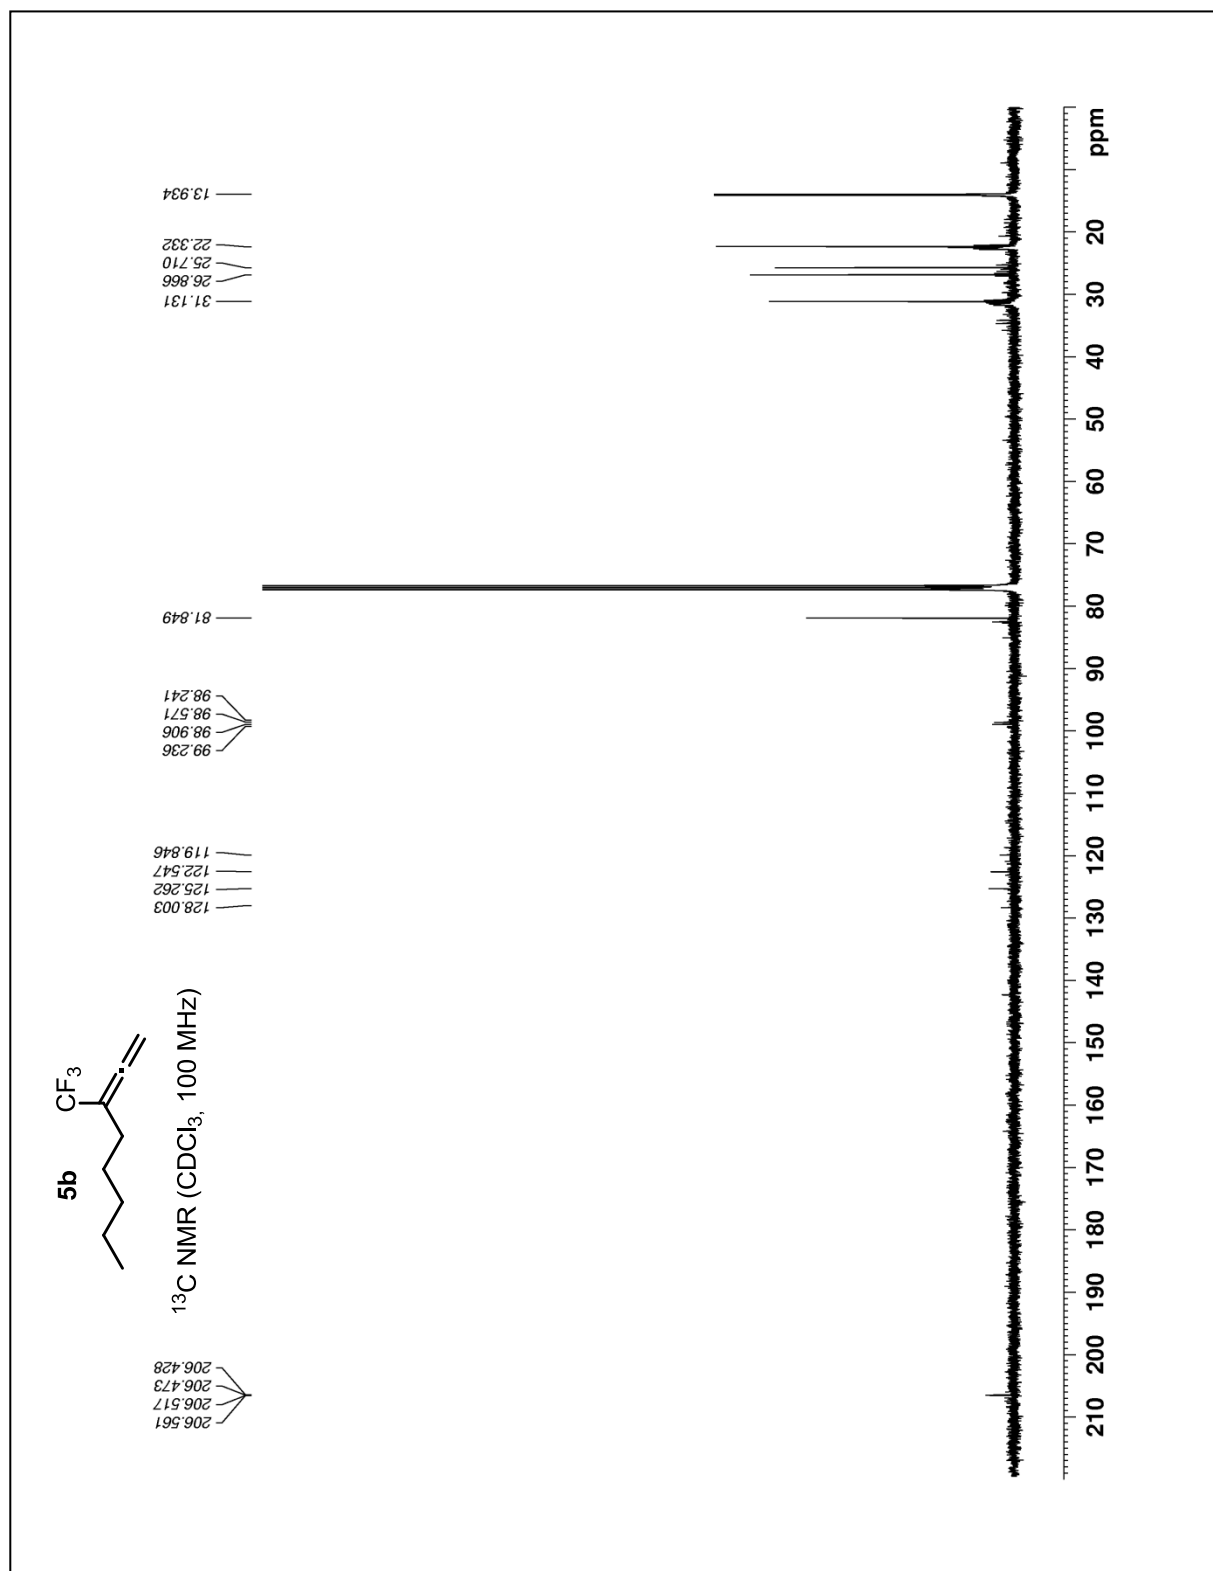



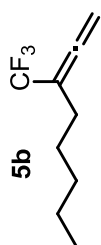

$^{19}\text{F}$  NMR ( $\text{CDCl}_3$ , 376 MHz)

64.275  
64.283  
64.293

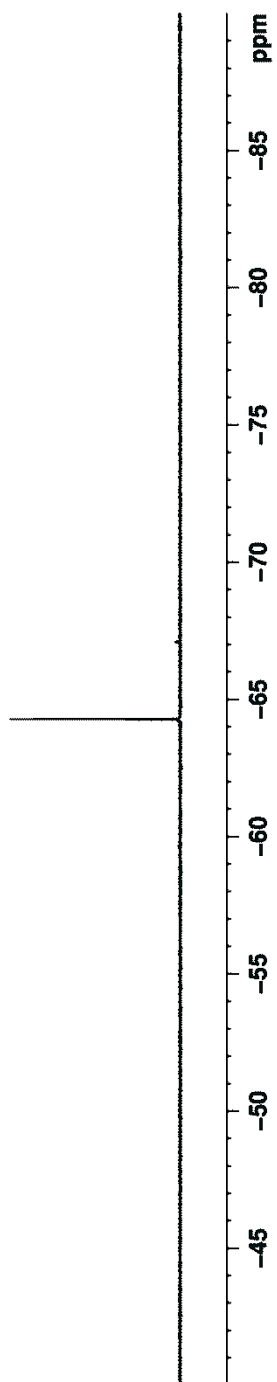

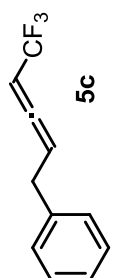

$^1\text{H}$  NMR ( $\text{CDCl}_3$ , 400 MHz)

3.503  
3.496  
3.485  
3.478

7.358  
7.256  
5.908  
5.898  
5.889  
5.880  
5.873  
5.870  
5.864  
5.854  
5.845  
5.836  
5.826  
5.509  
5.502  
5.494  
5.487  
5.479  
5.472  
5.464  
5.457  
5.450  
5.442  
5.435

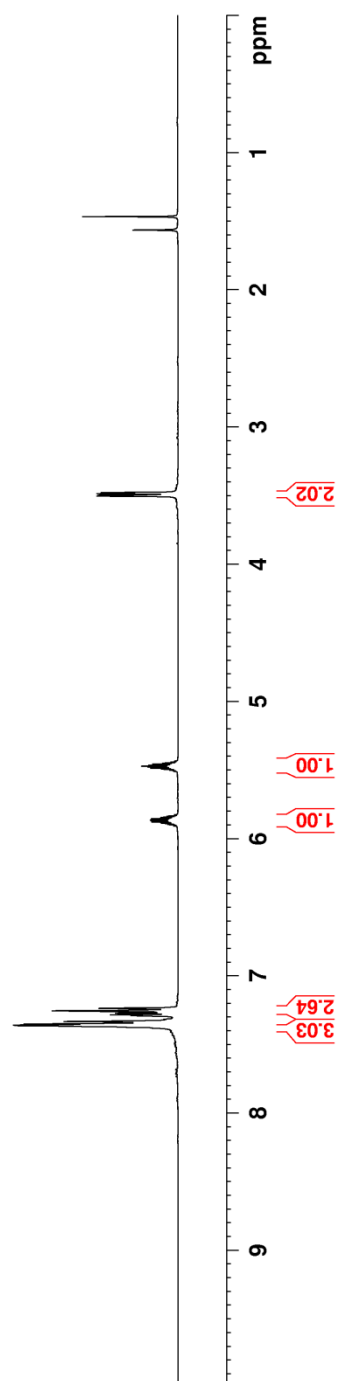

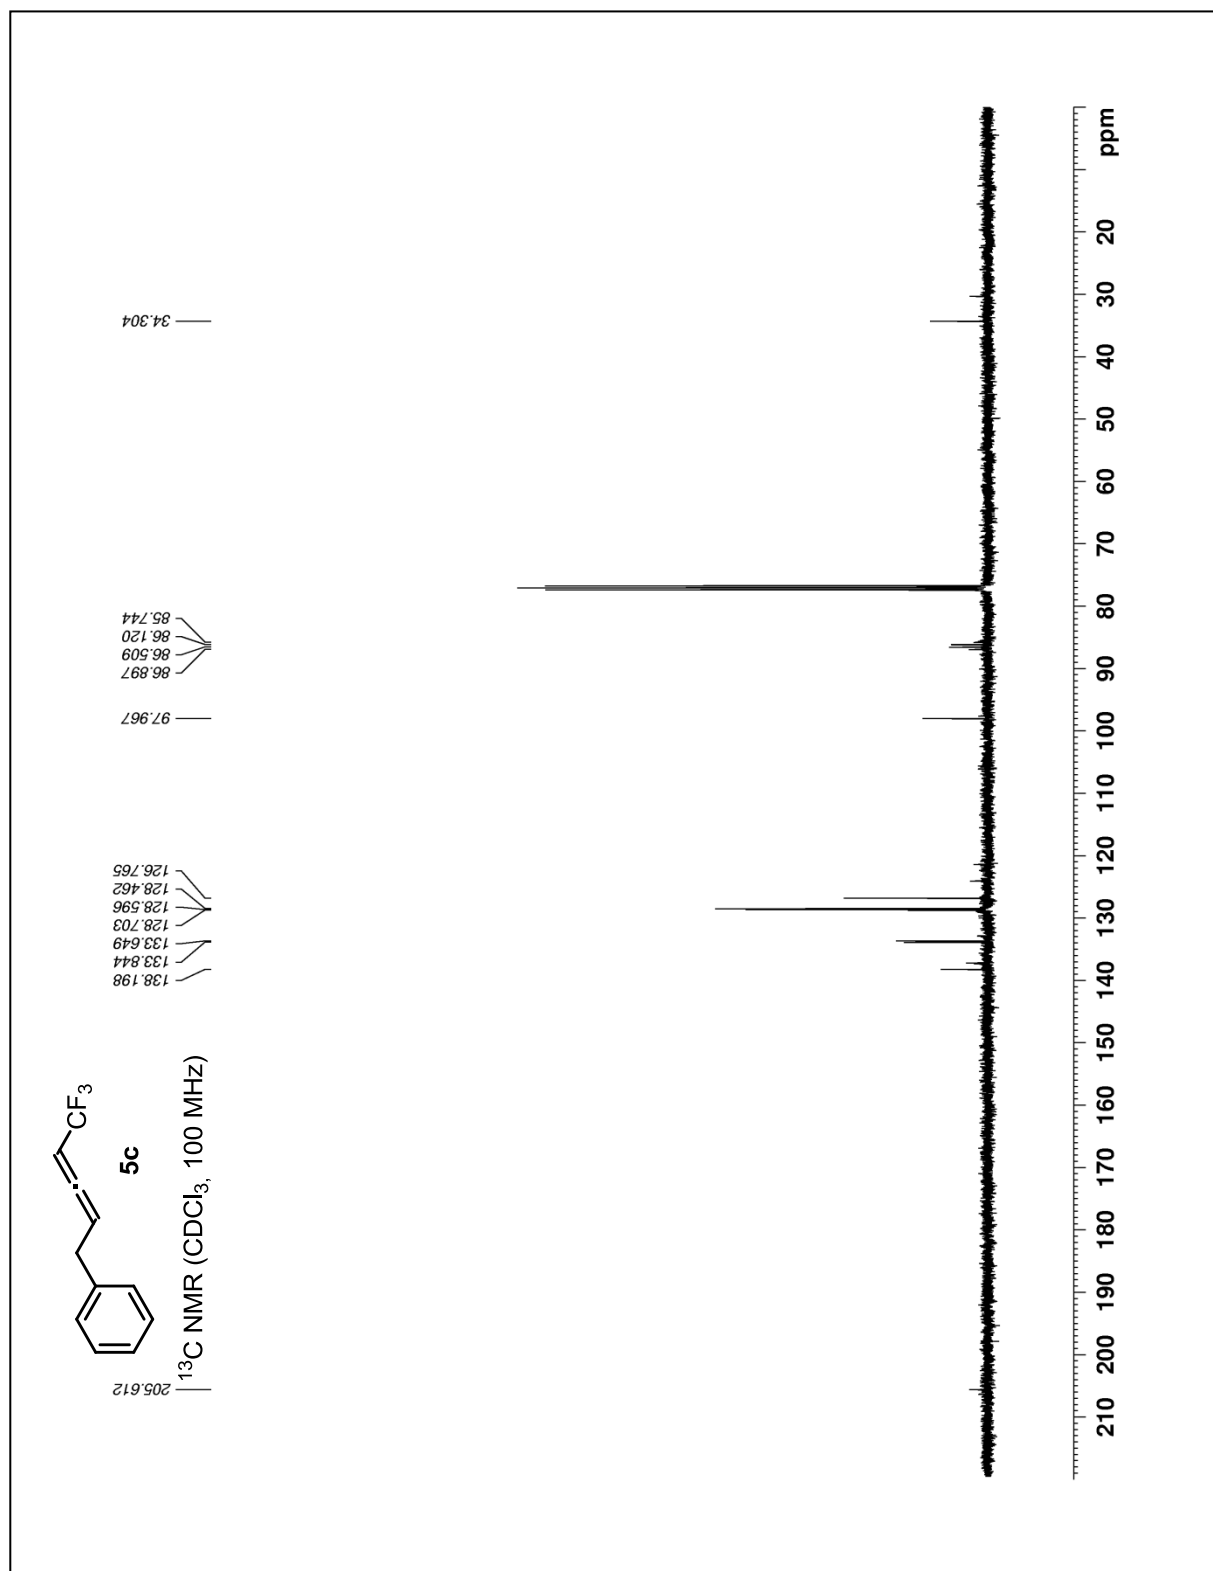

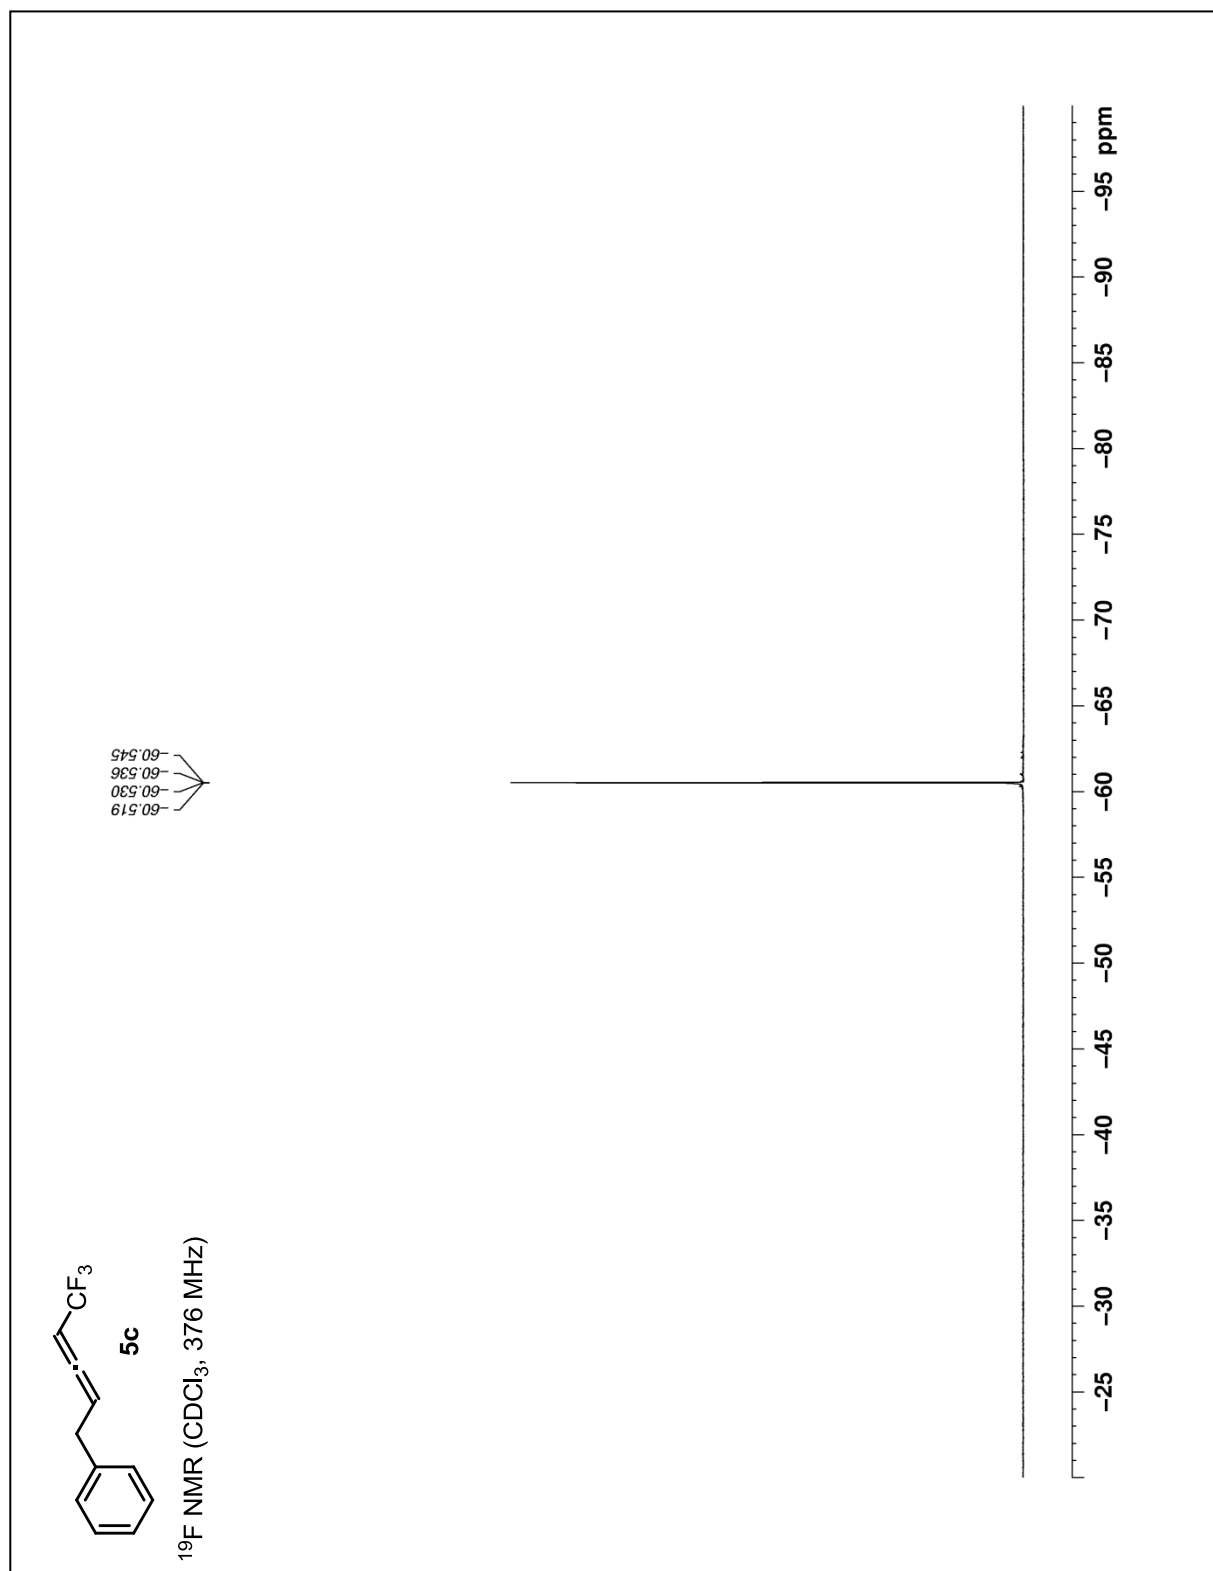

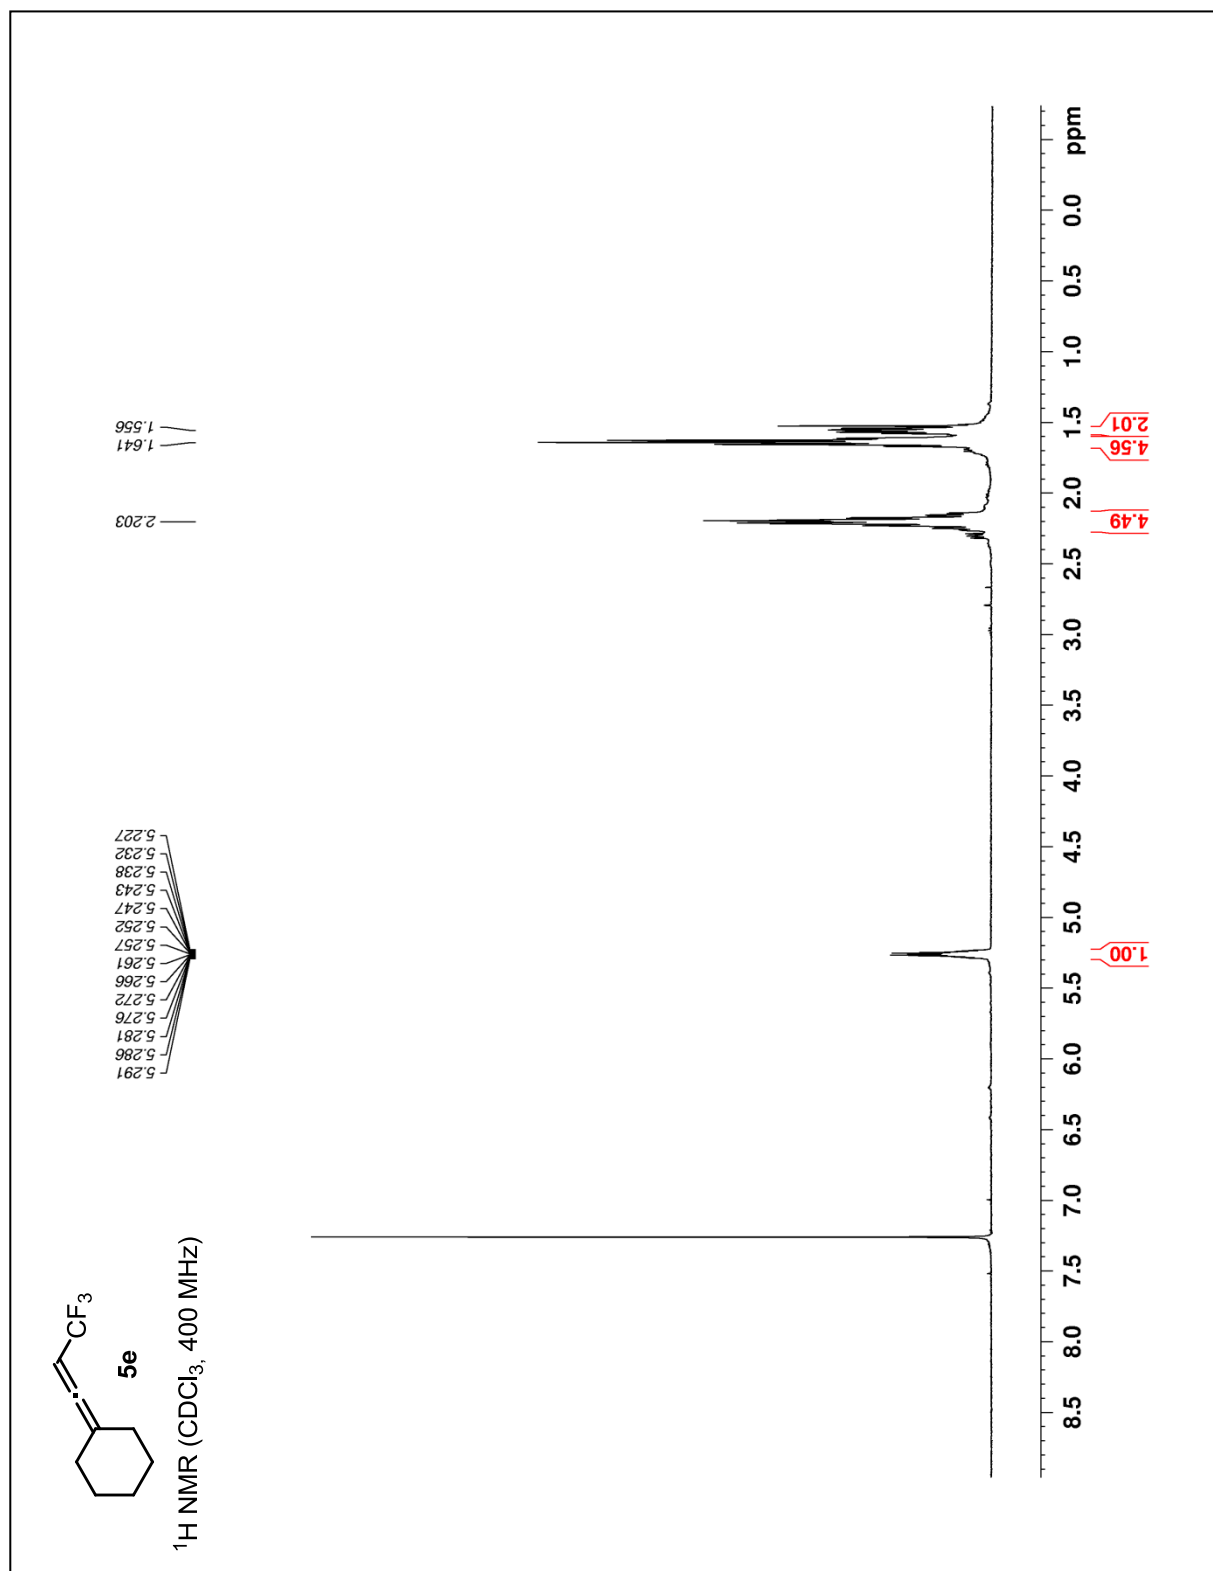

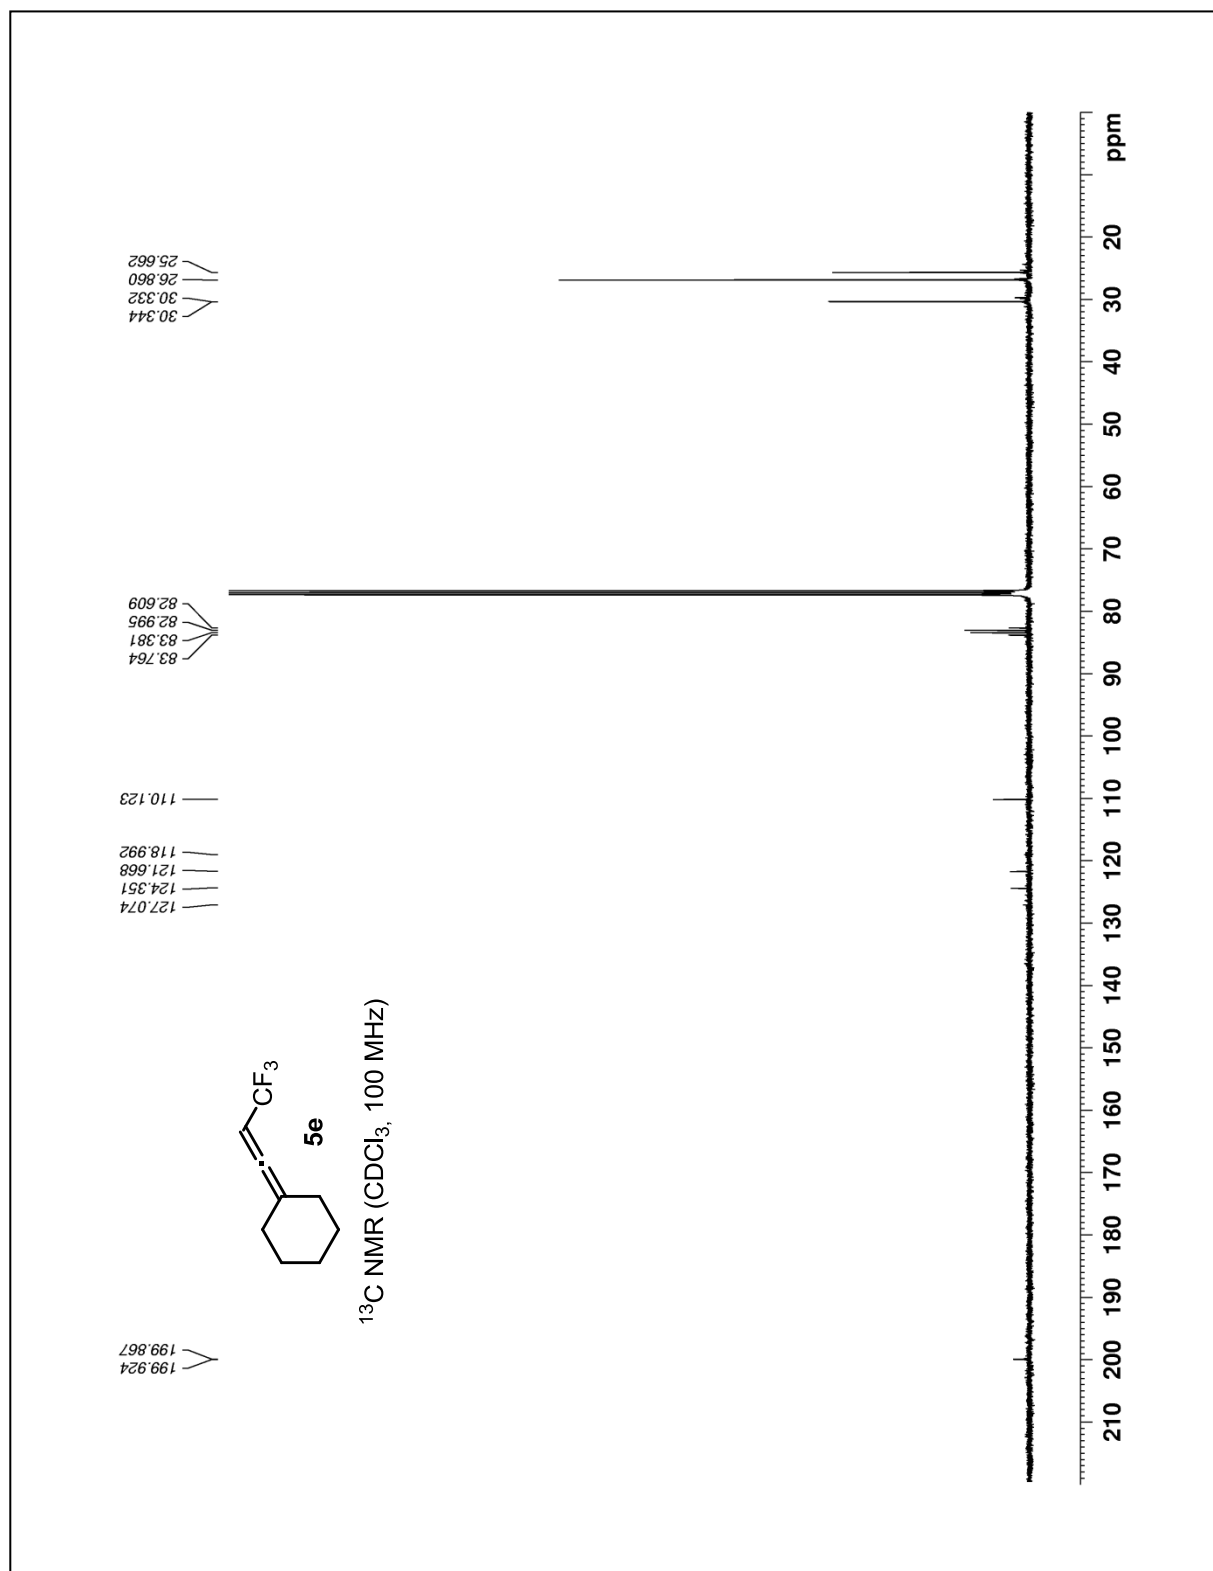

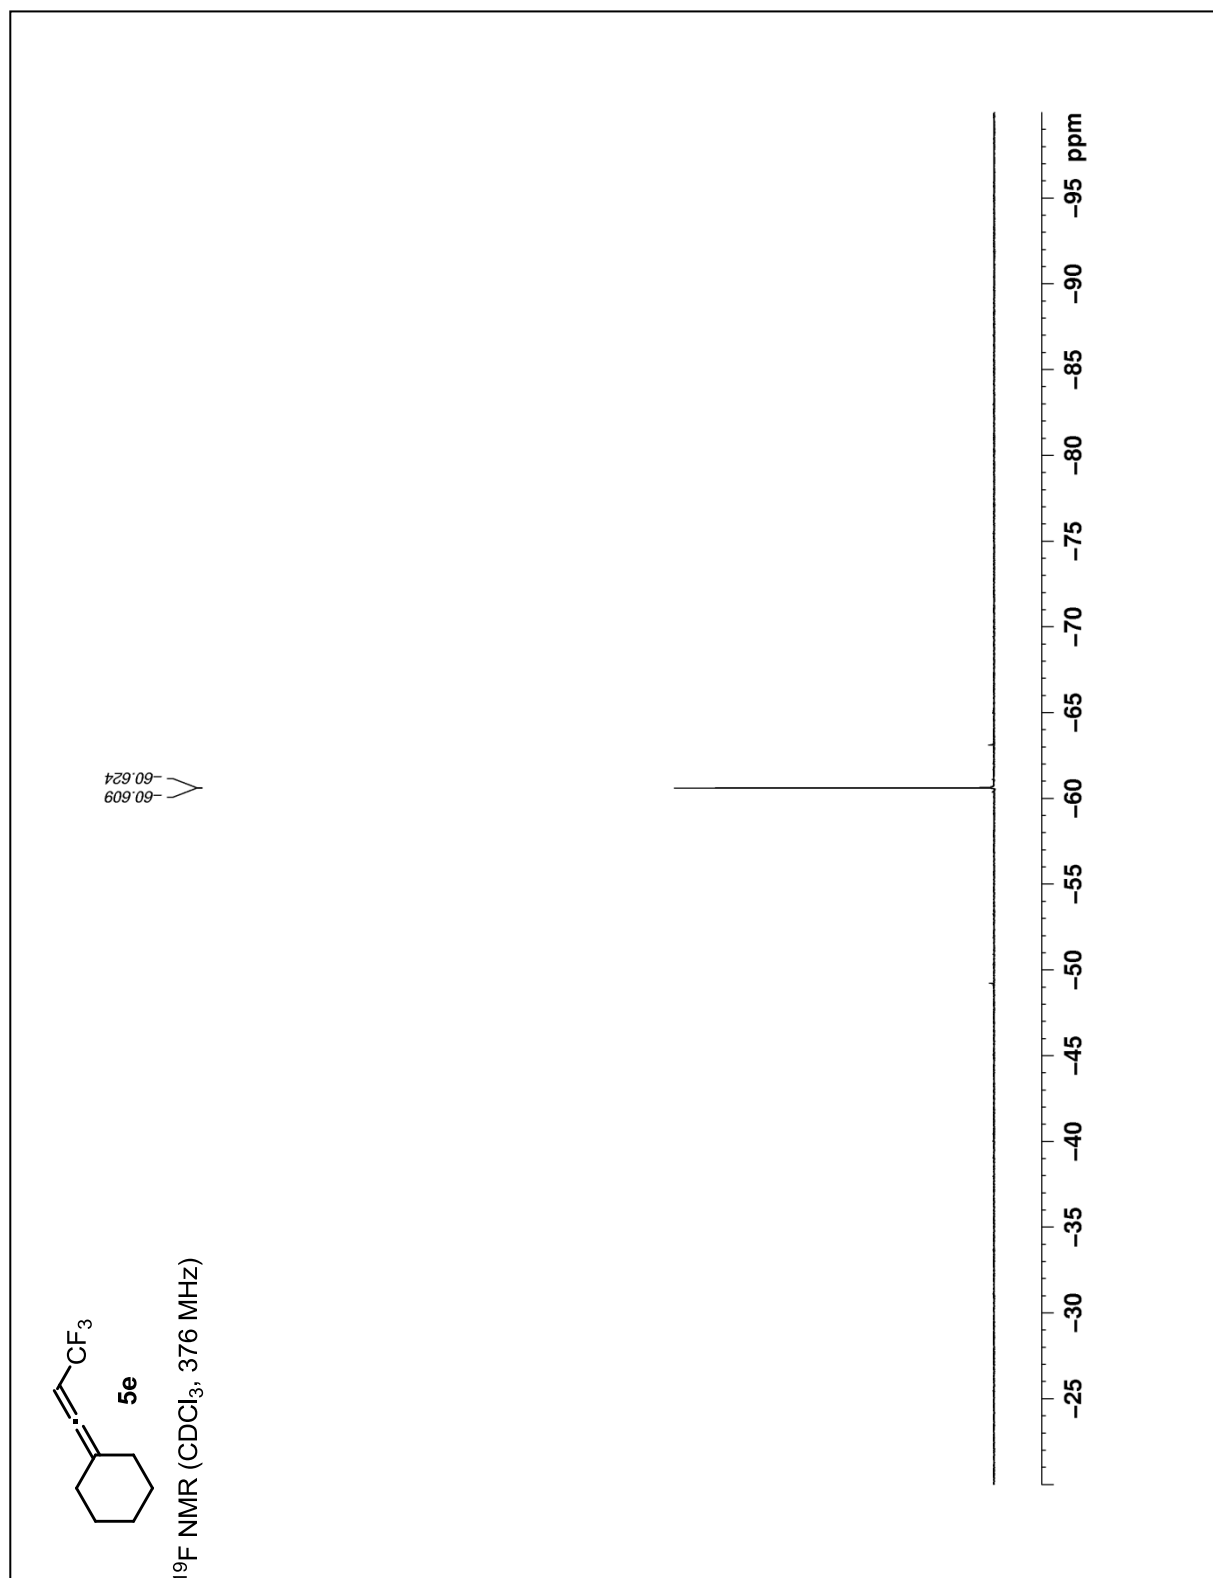

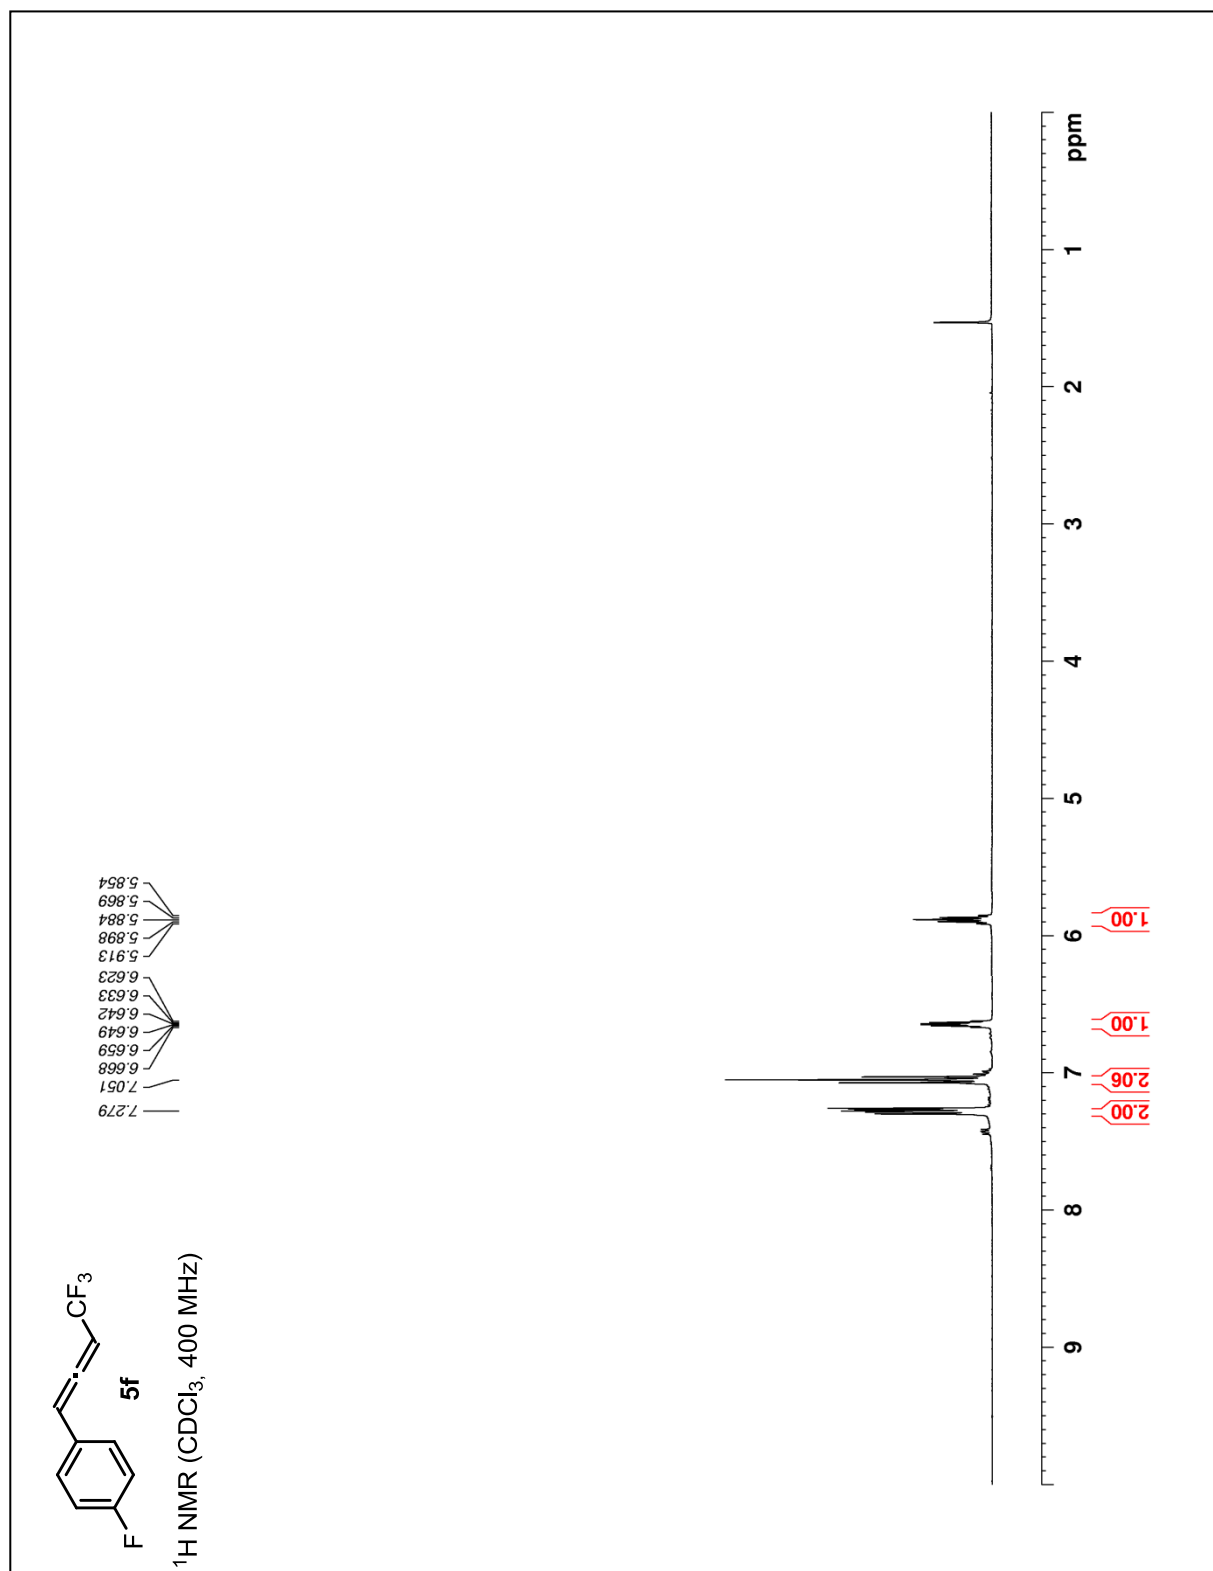



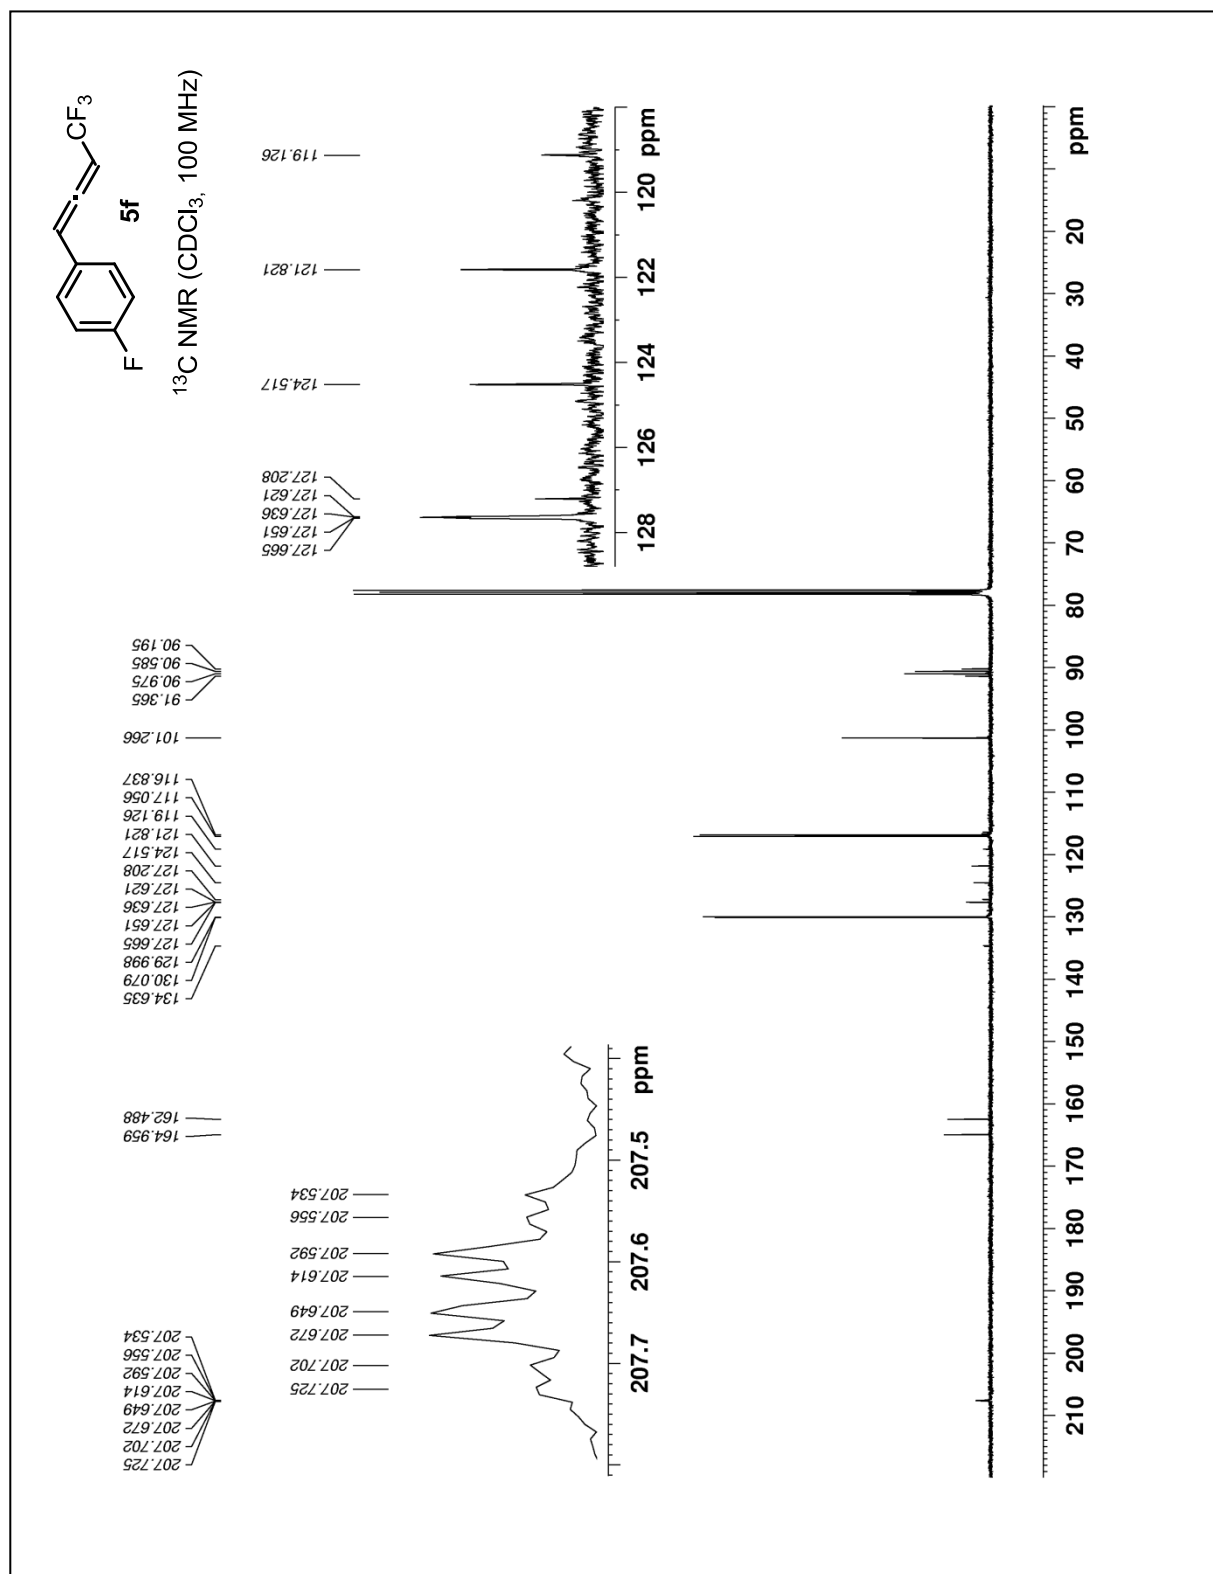

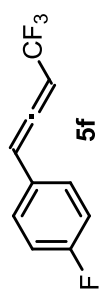

$^{19}\text{F}$  NMR ( $\text{CDCl}_3$ , 376 MHz)

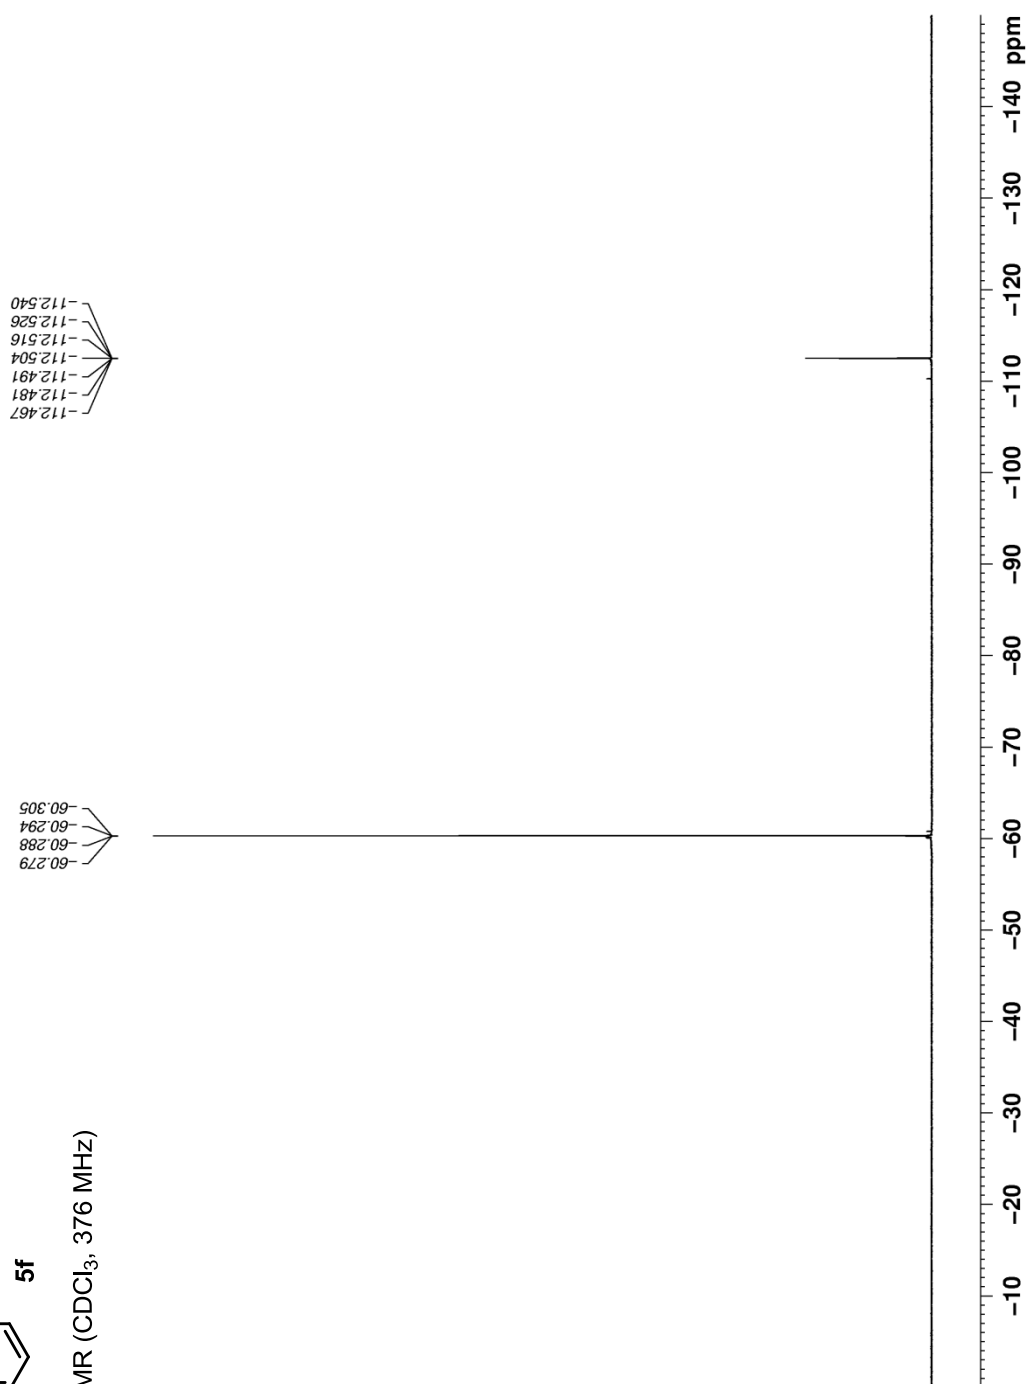

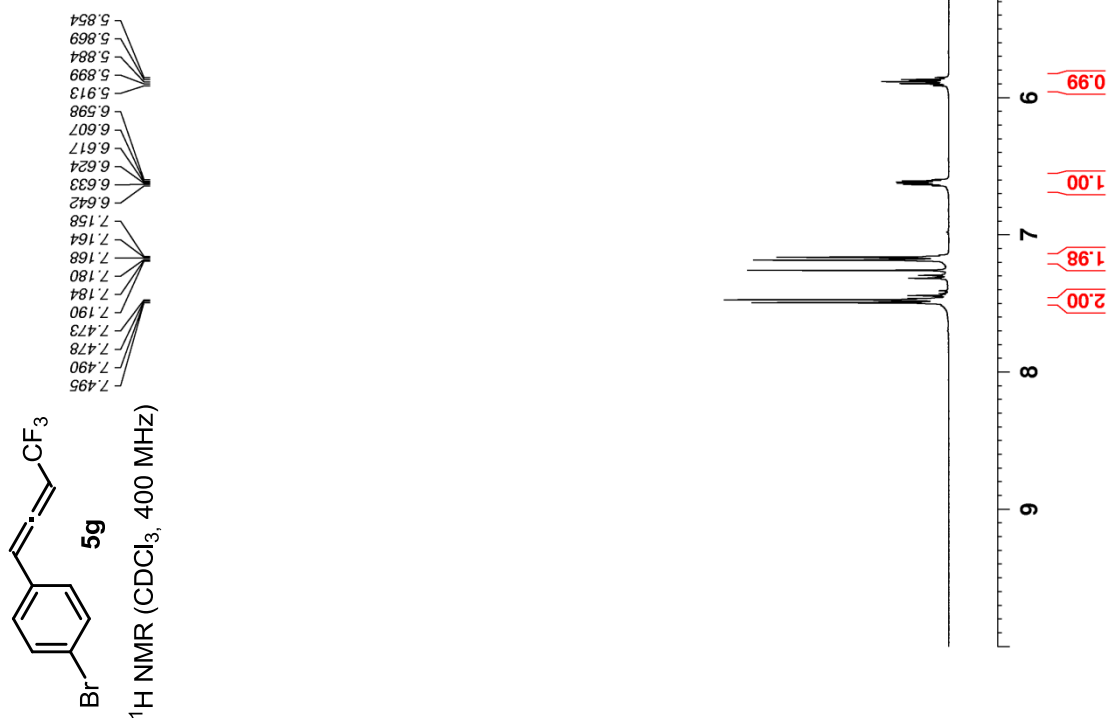

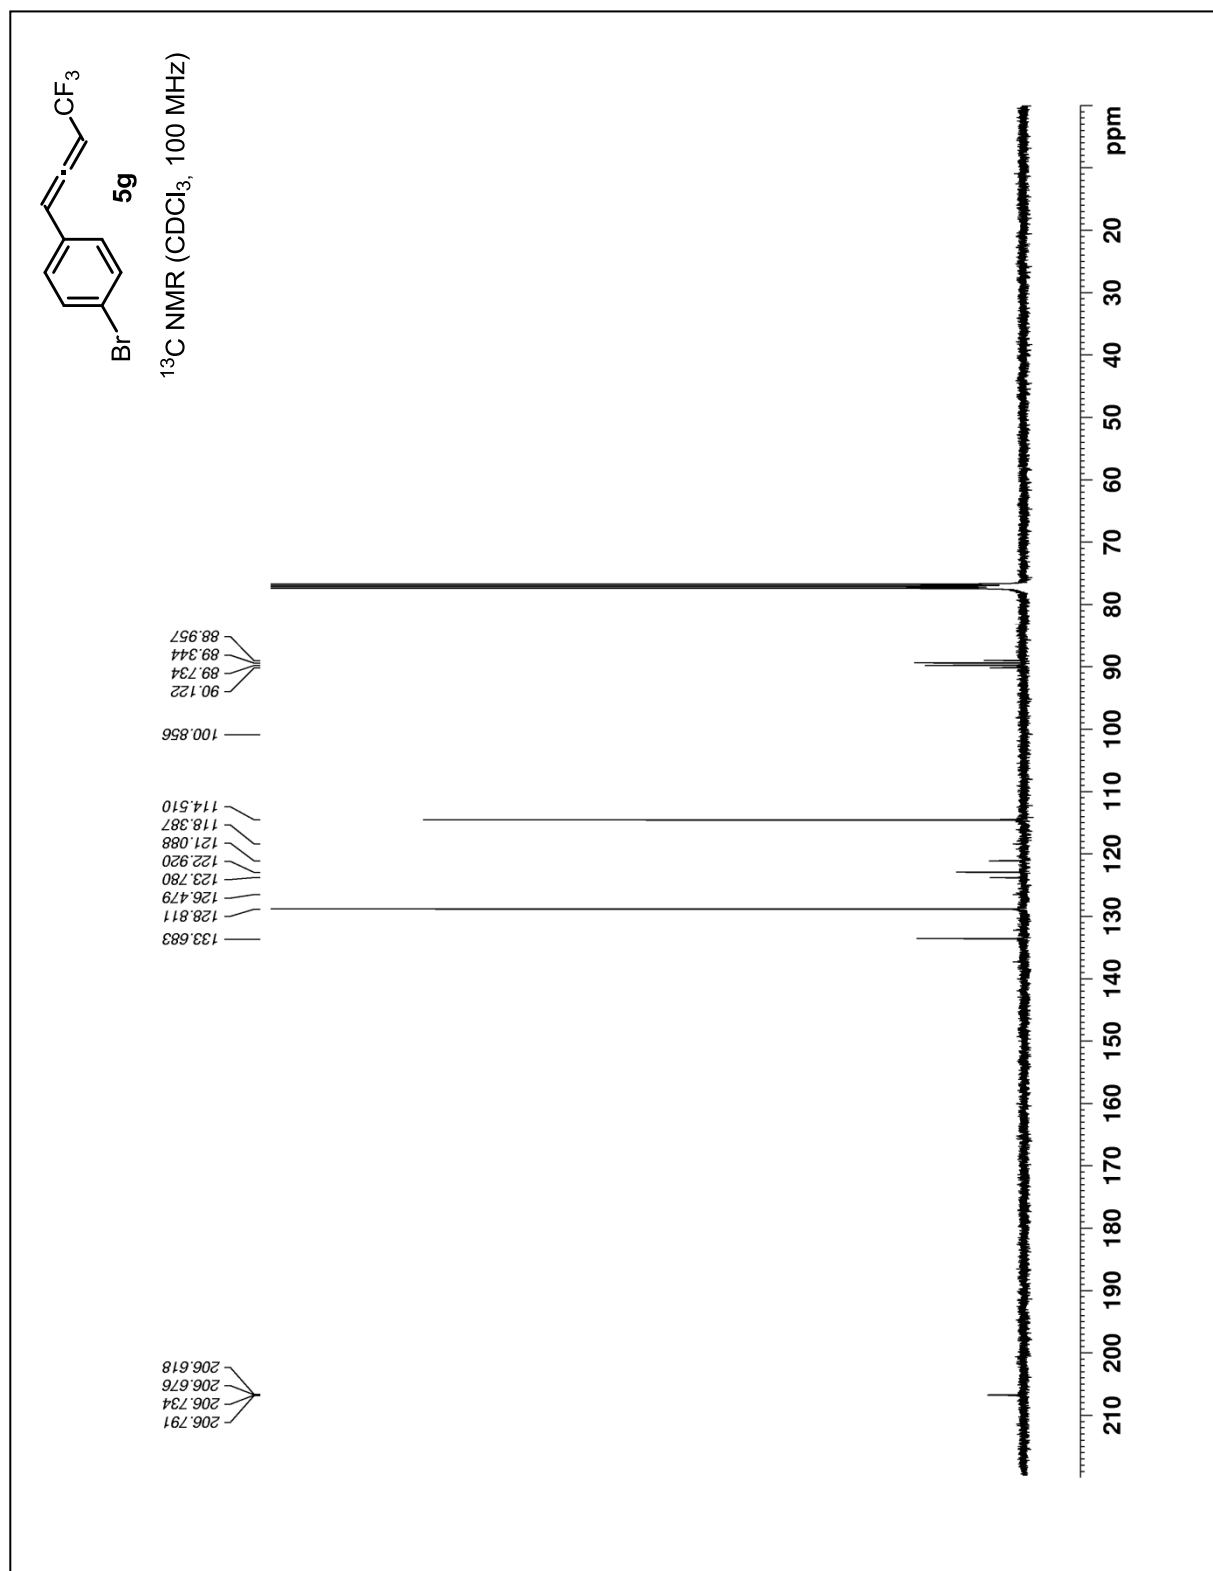

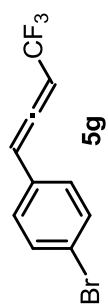

$^{19}\text{F}$  NMR ( $\text{CDCl}_3$ , 376 MHz)

-60.190  
 -60.198  
 -60.204  
 -60.215

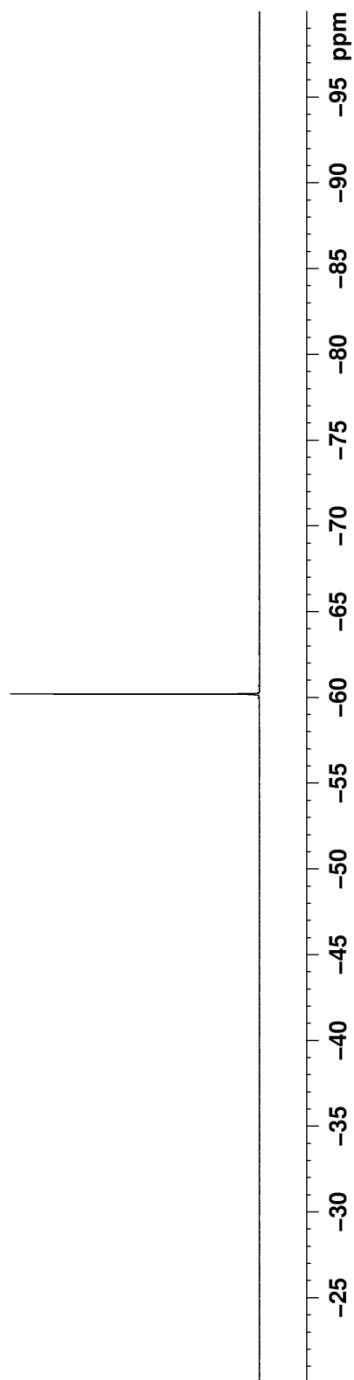

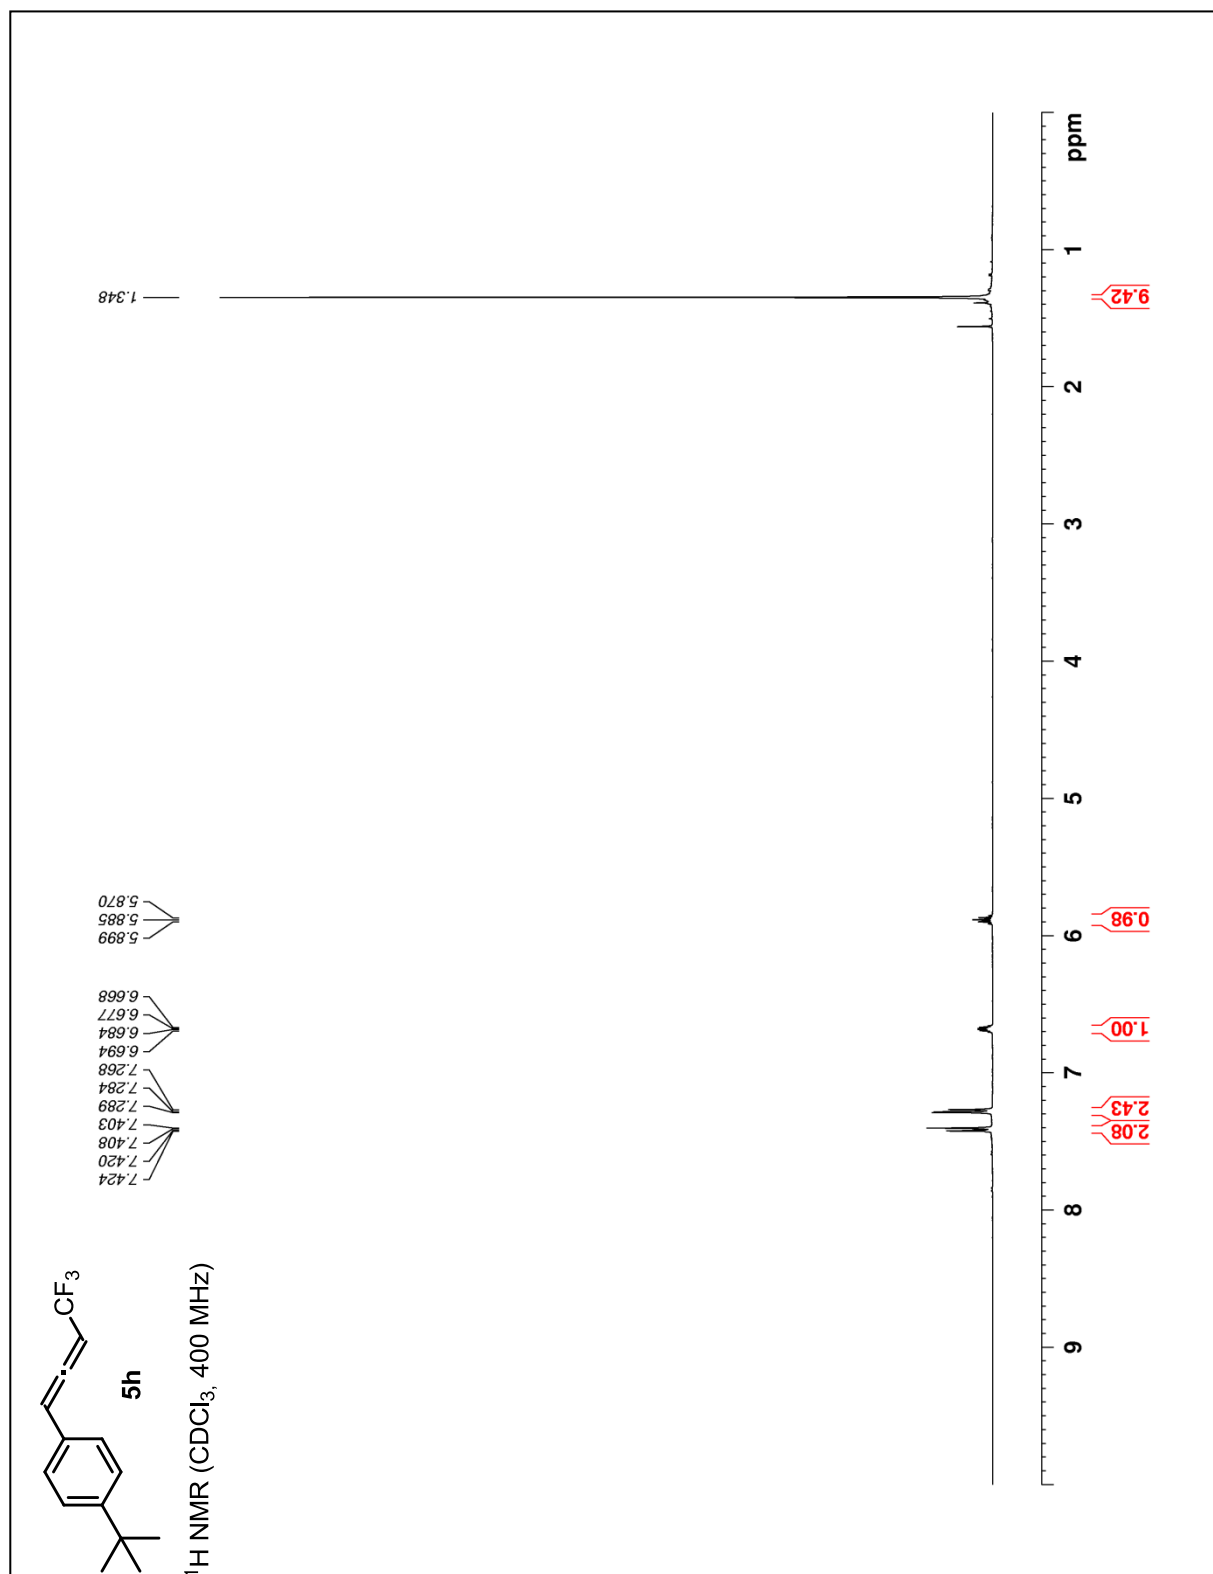

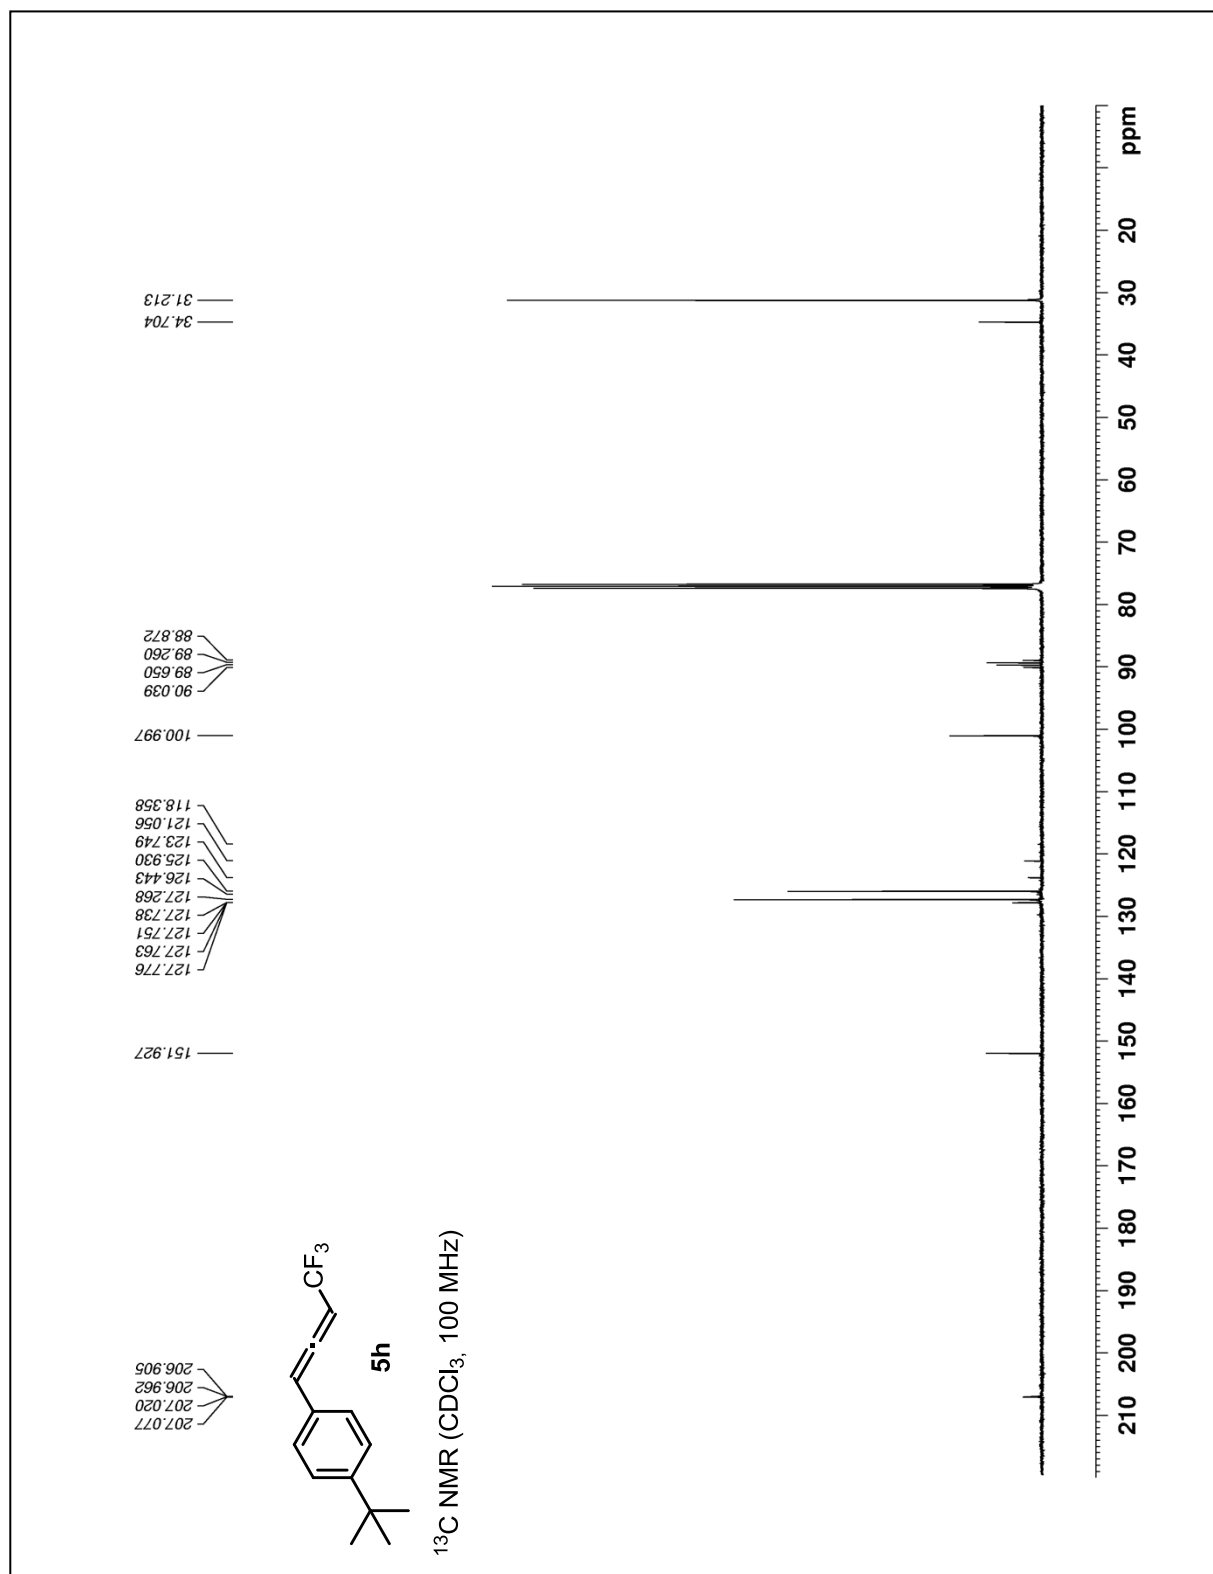

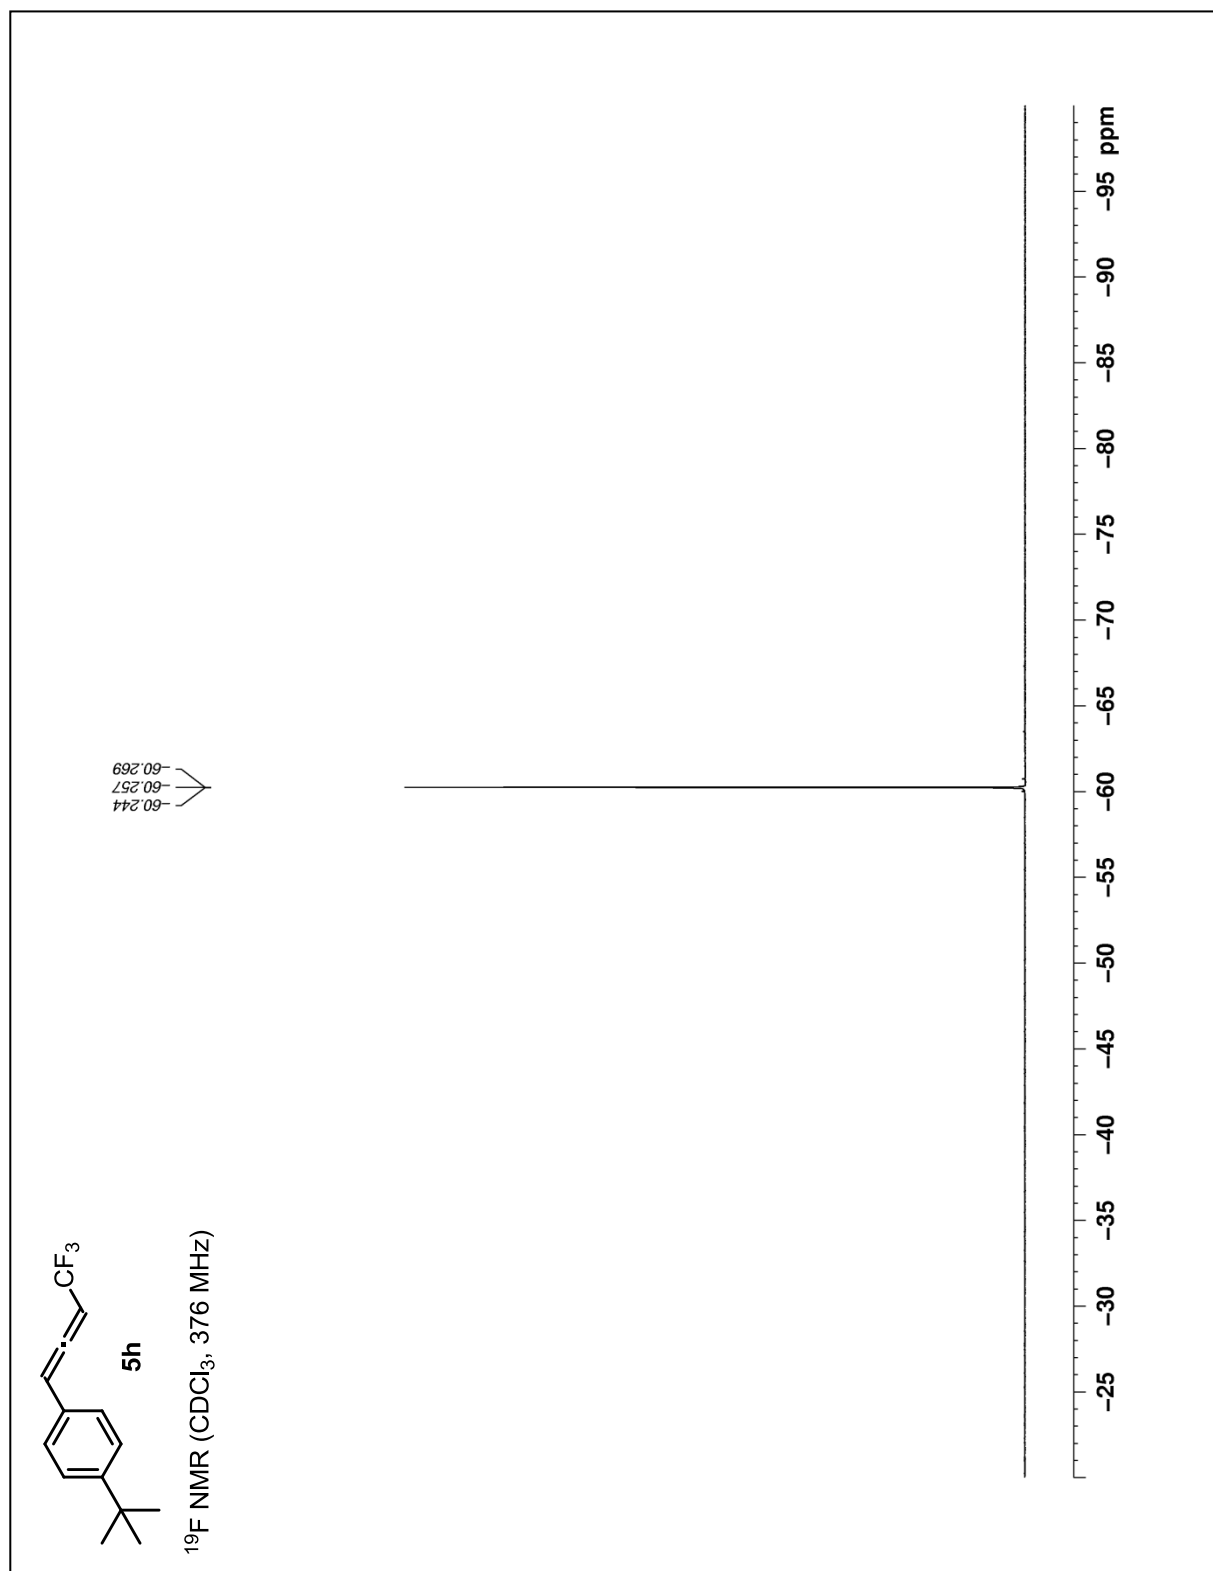



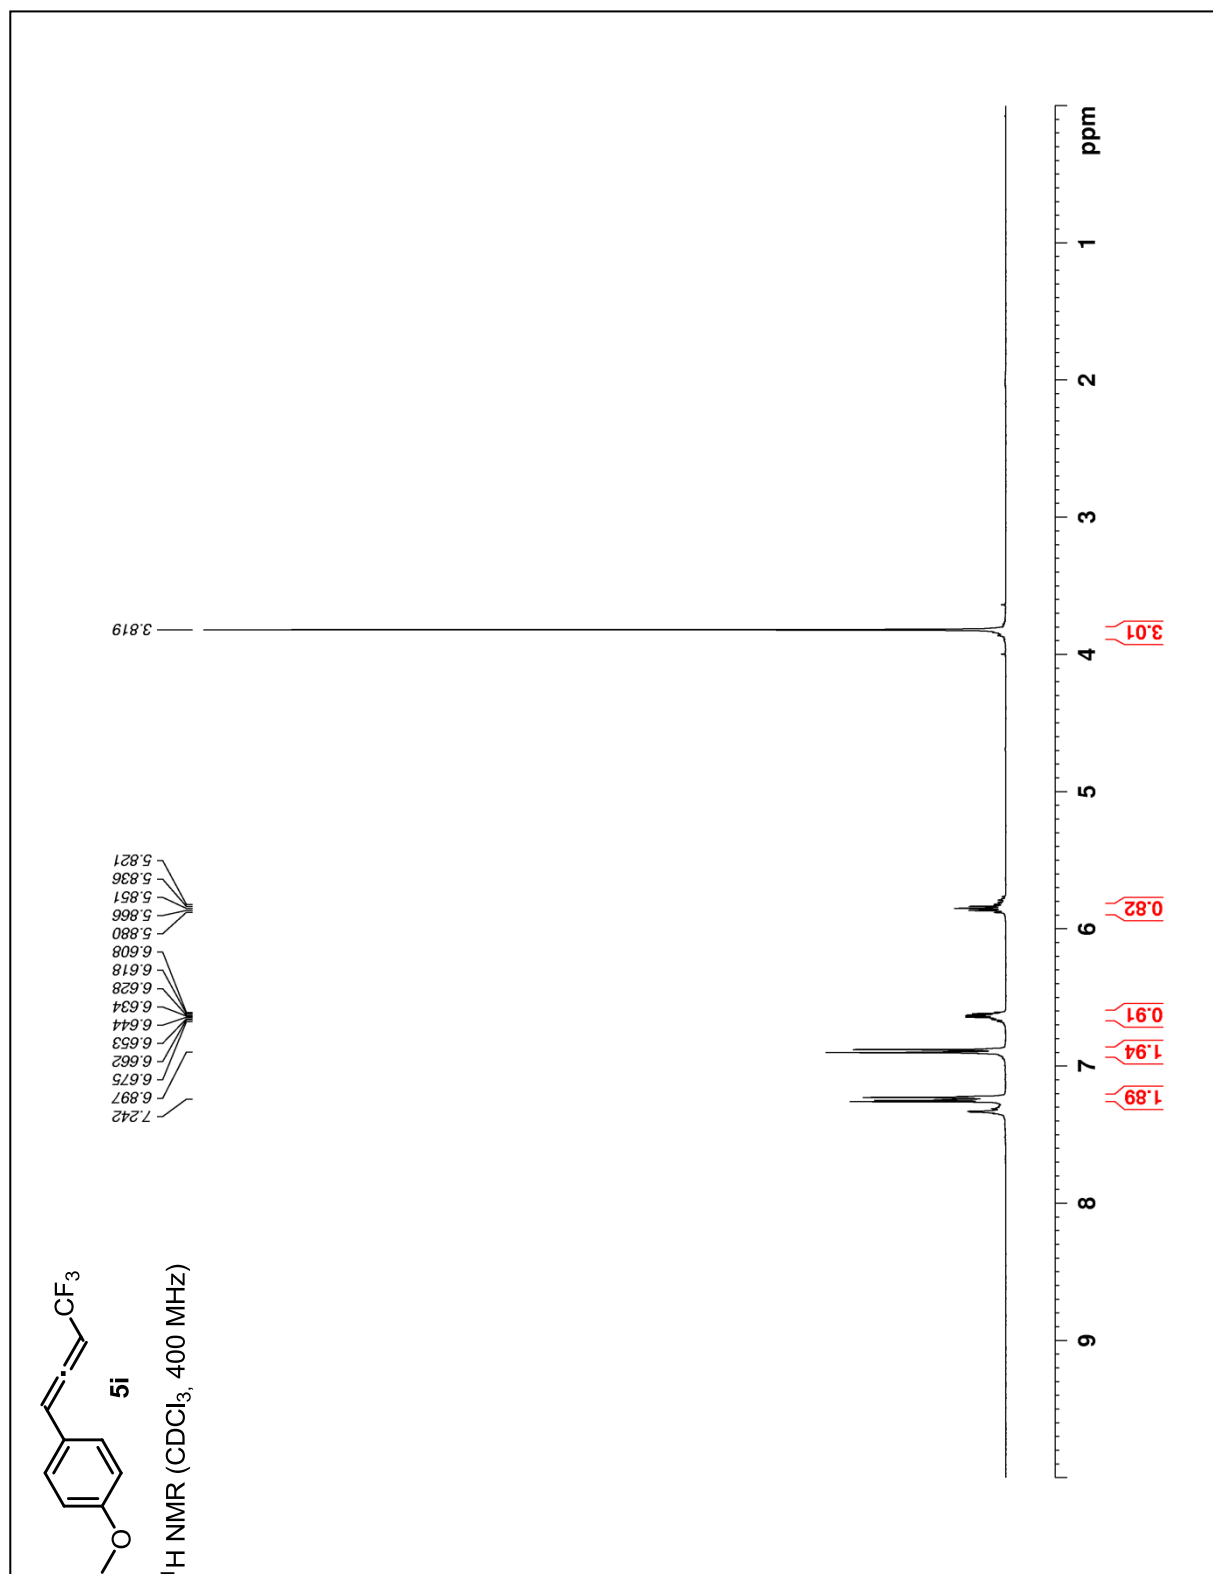

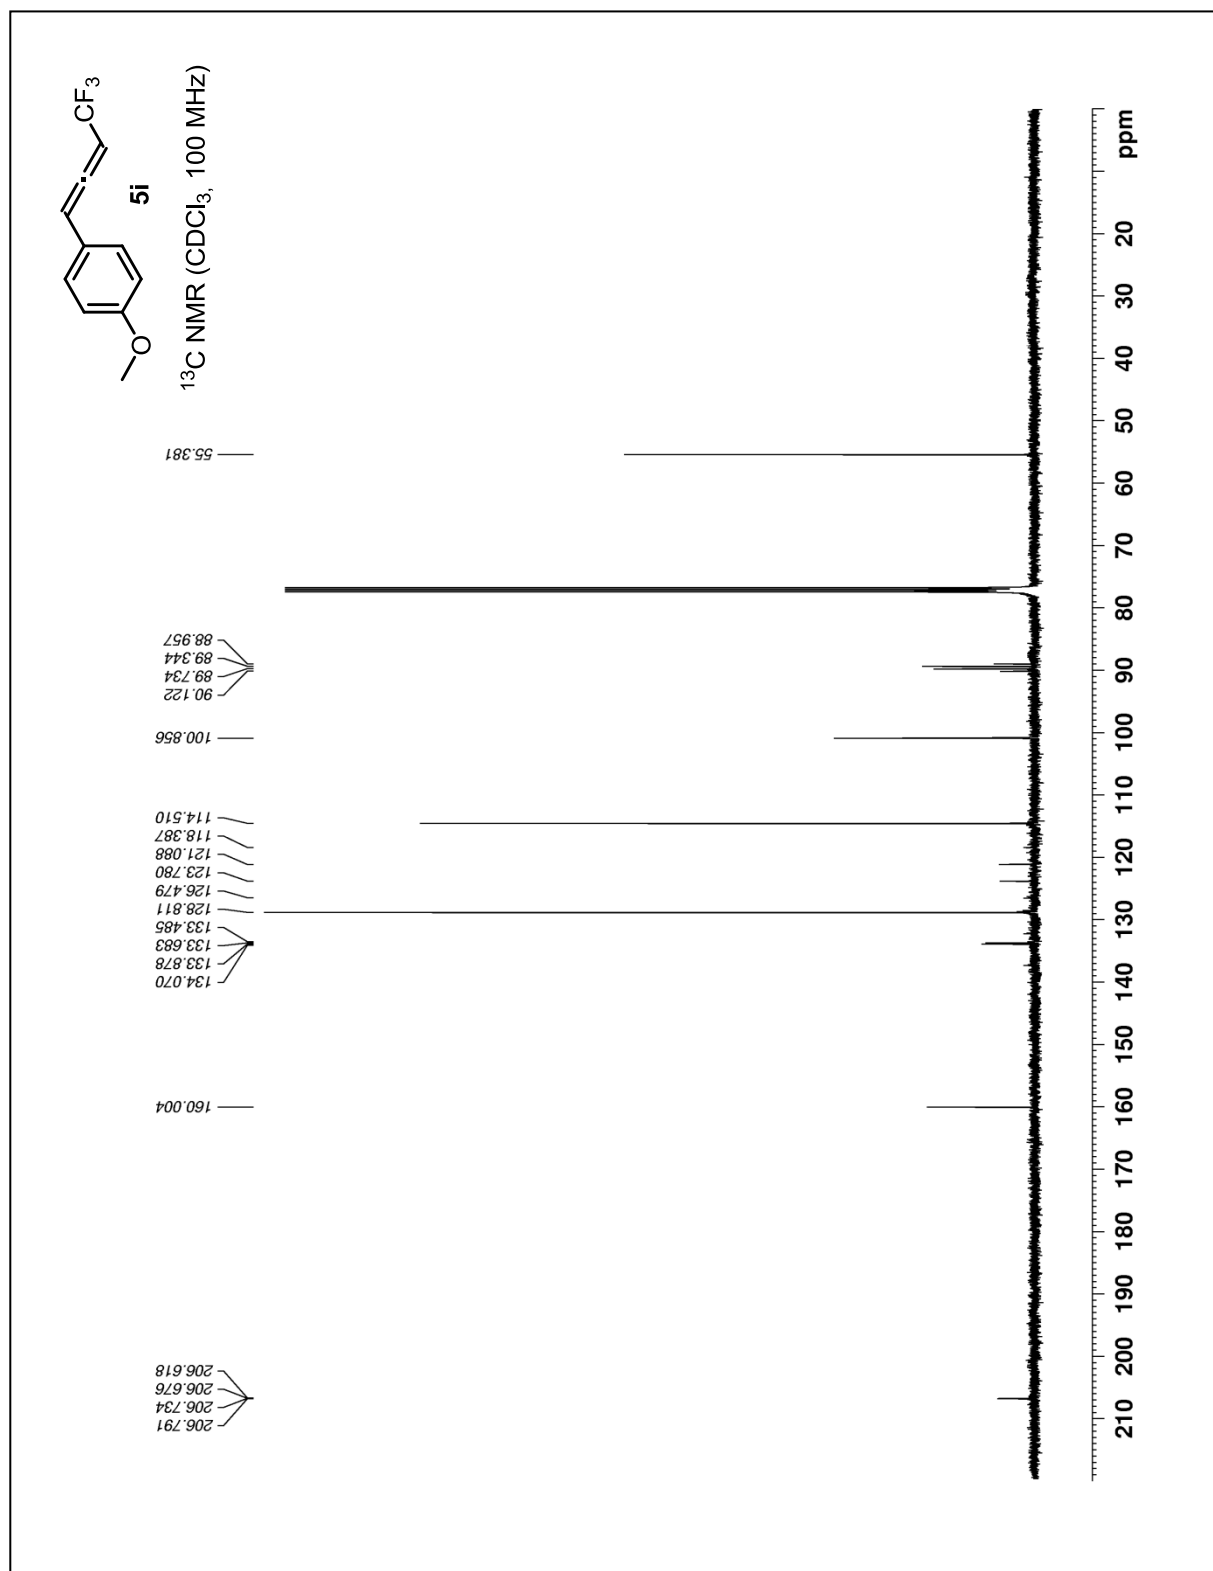

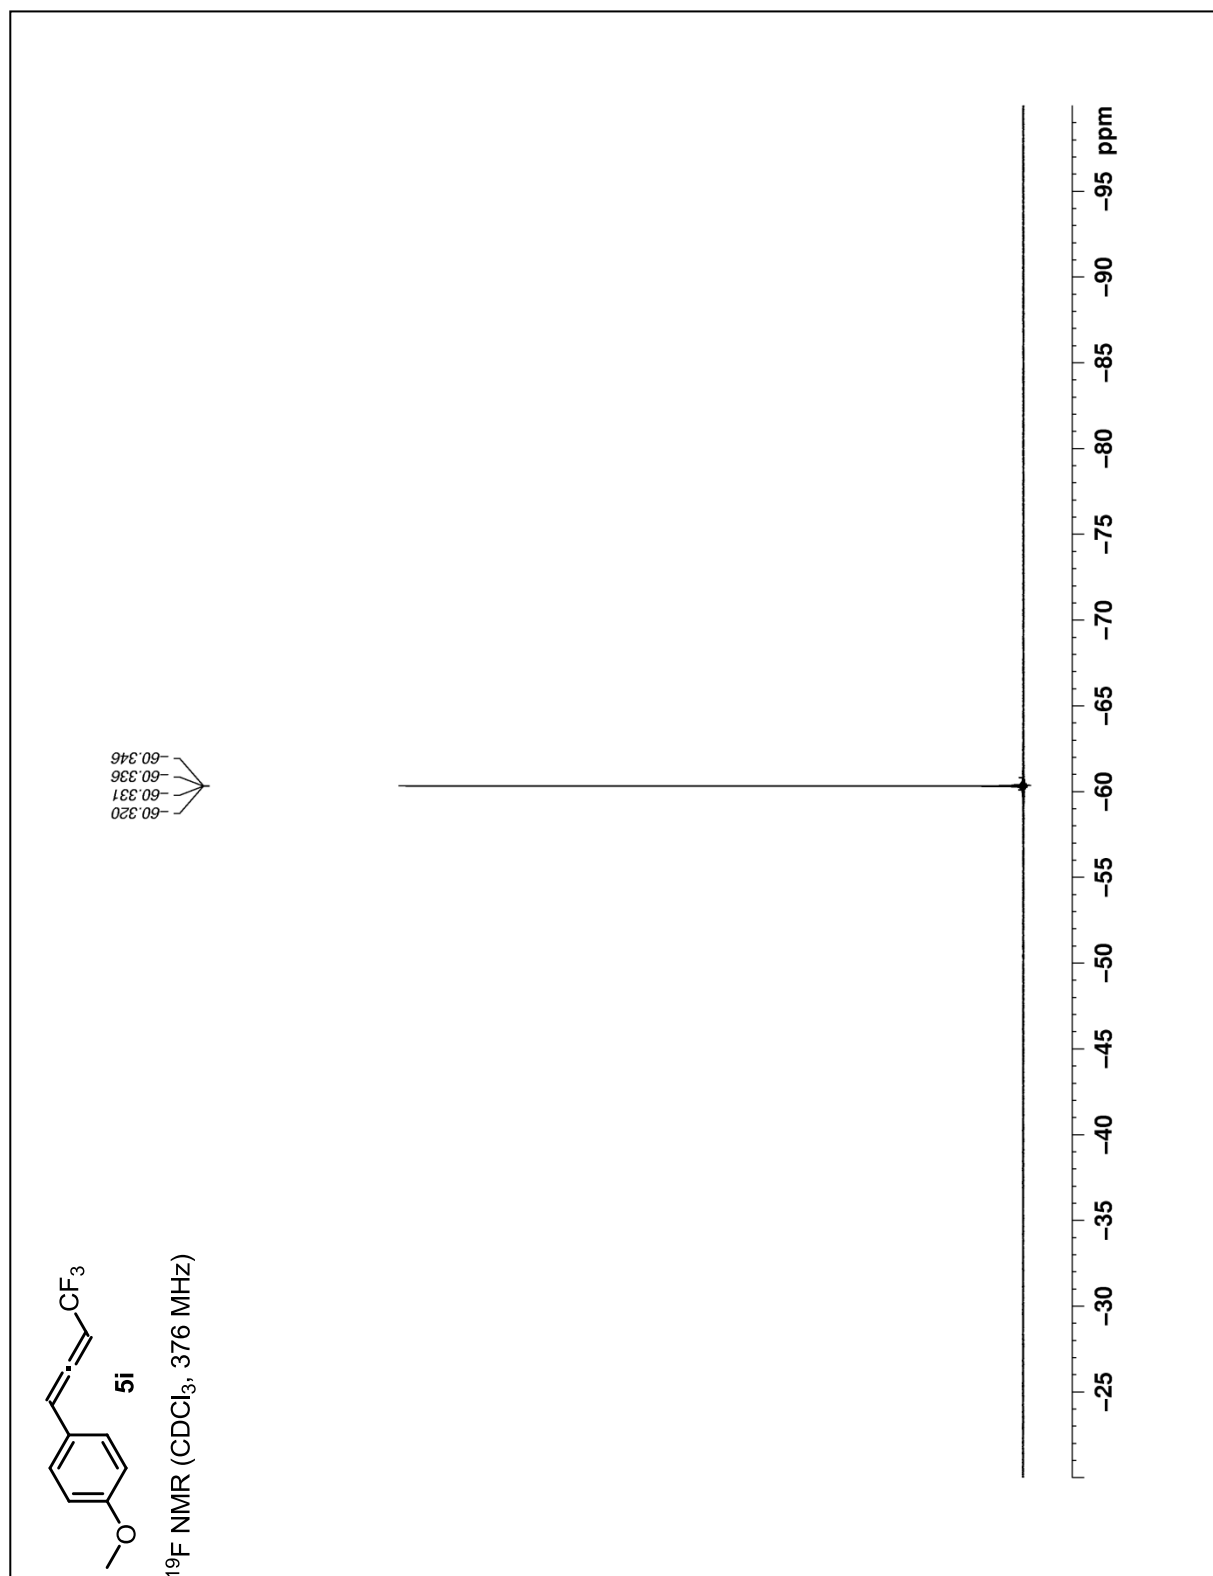

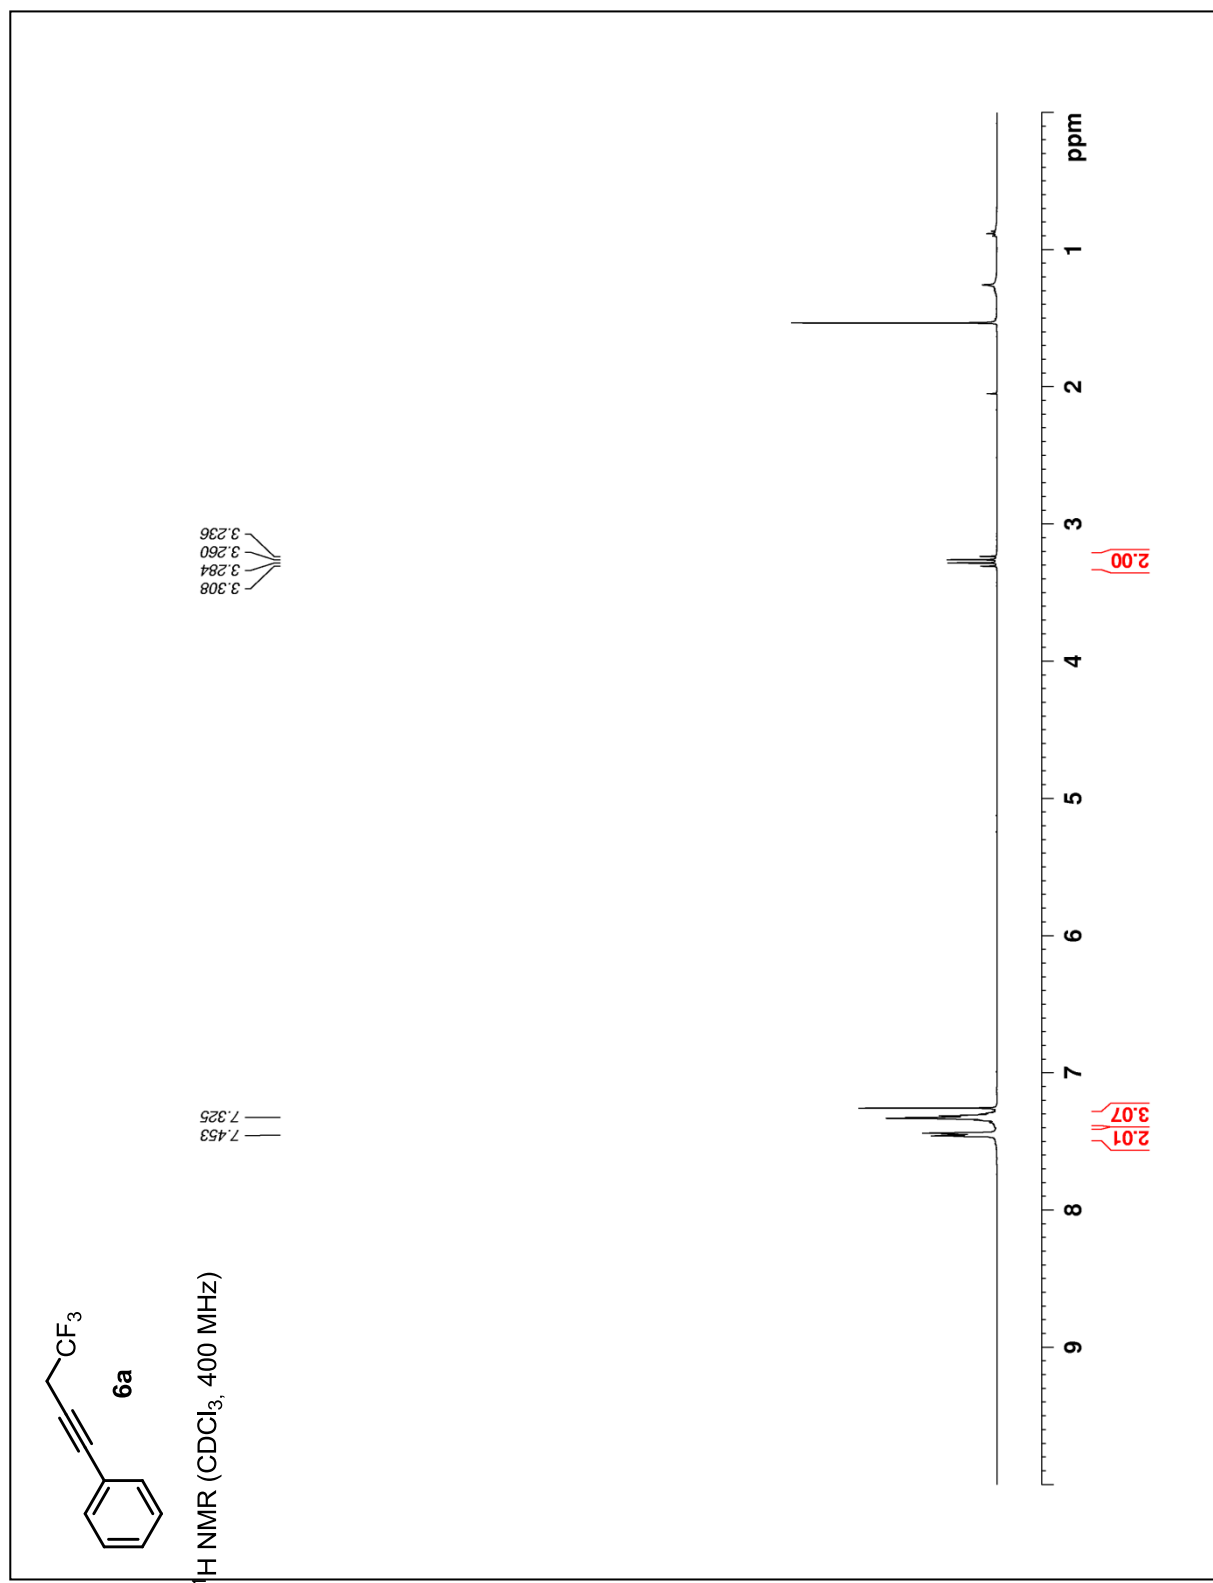

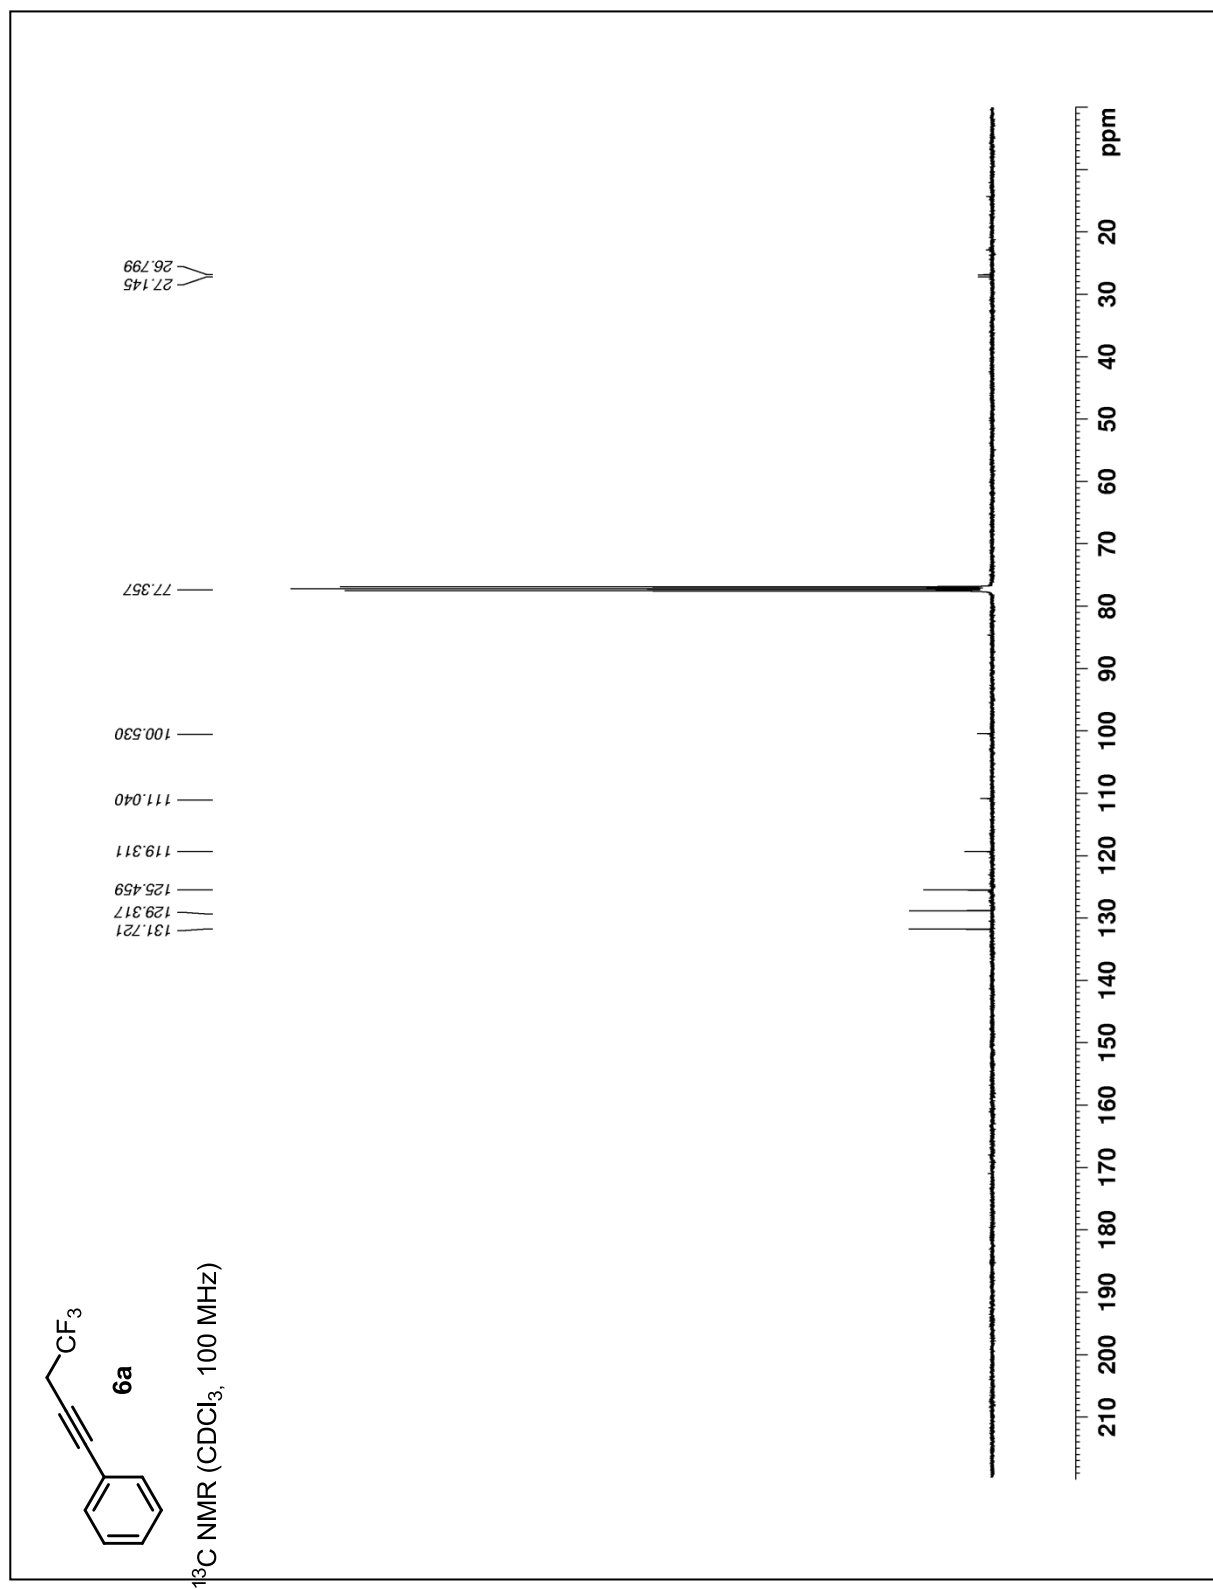

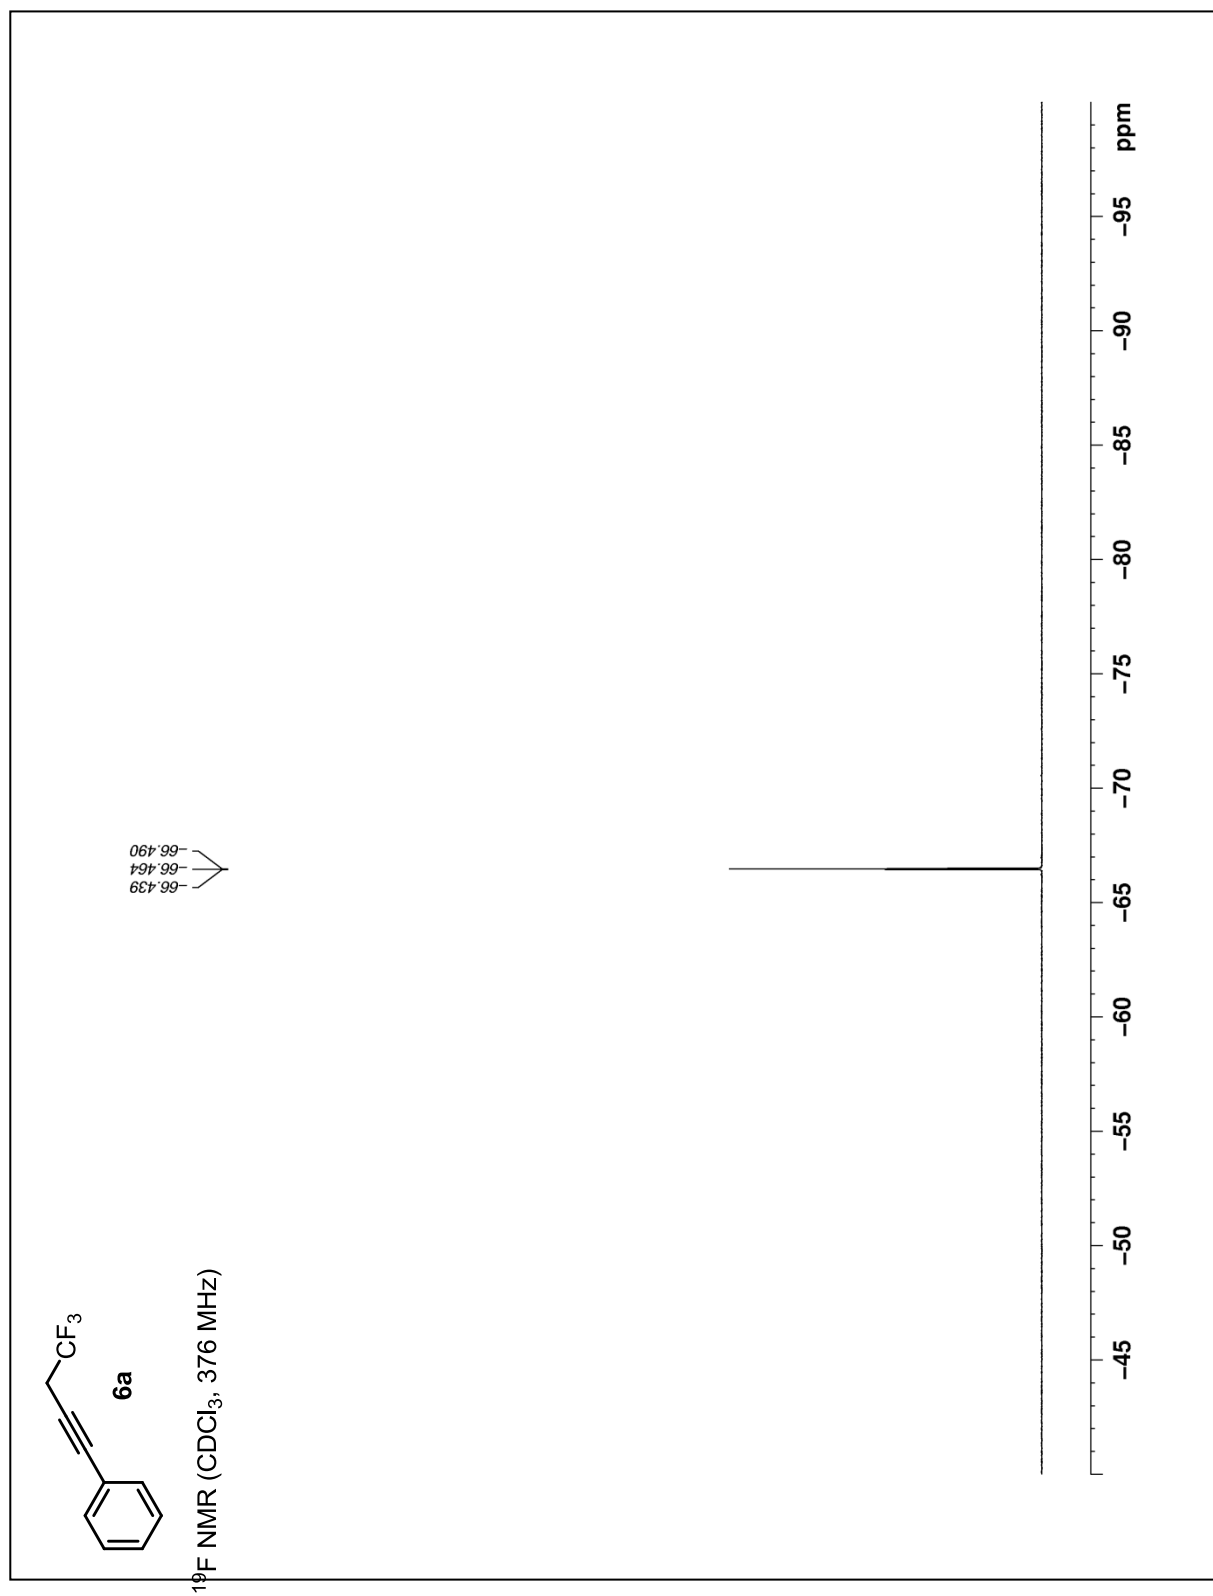

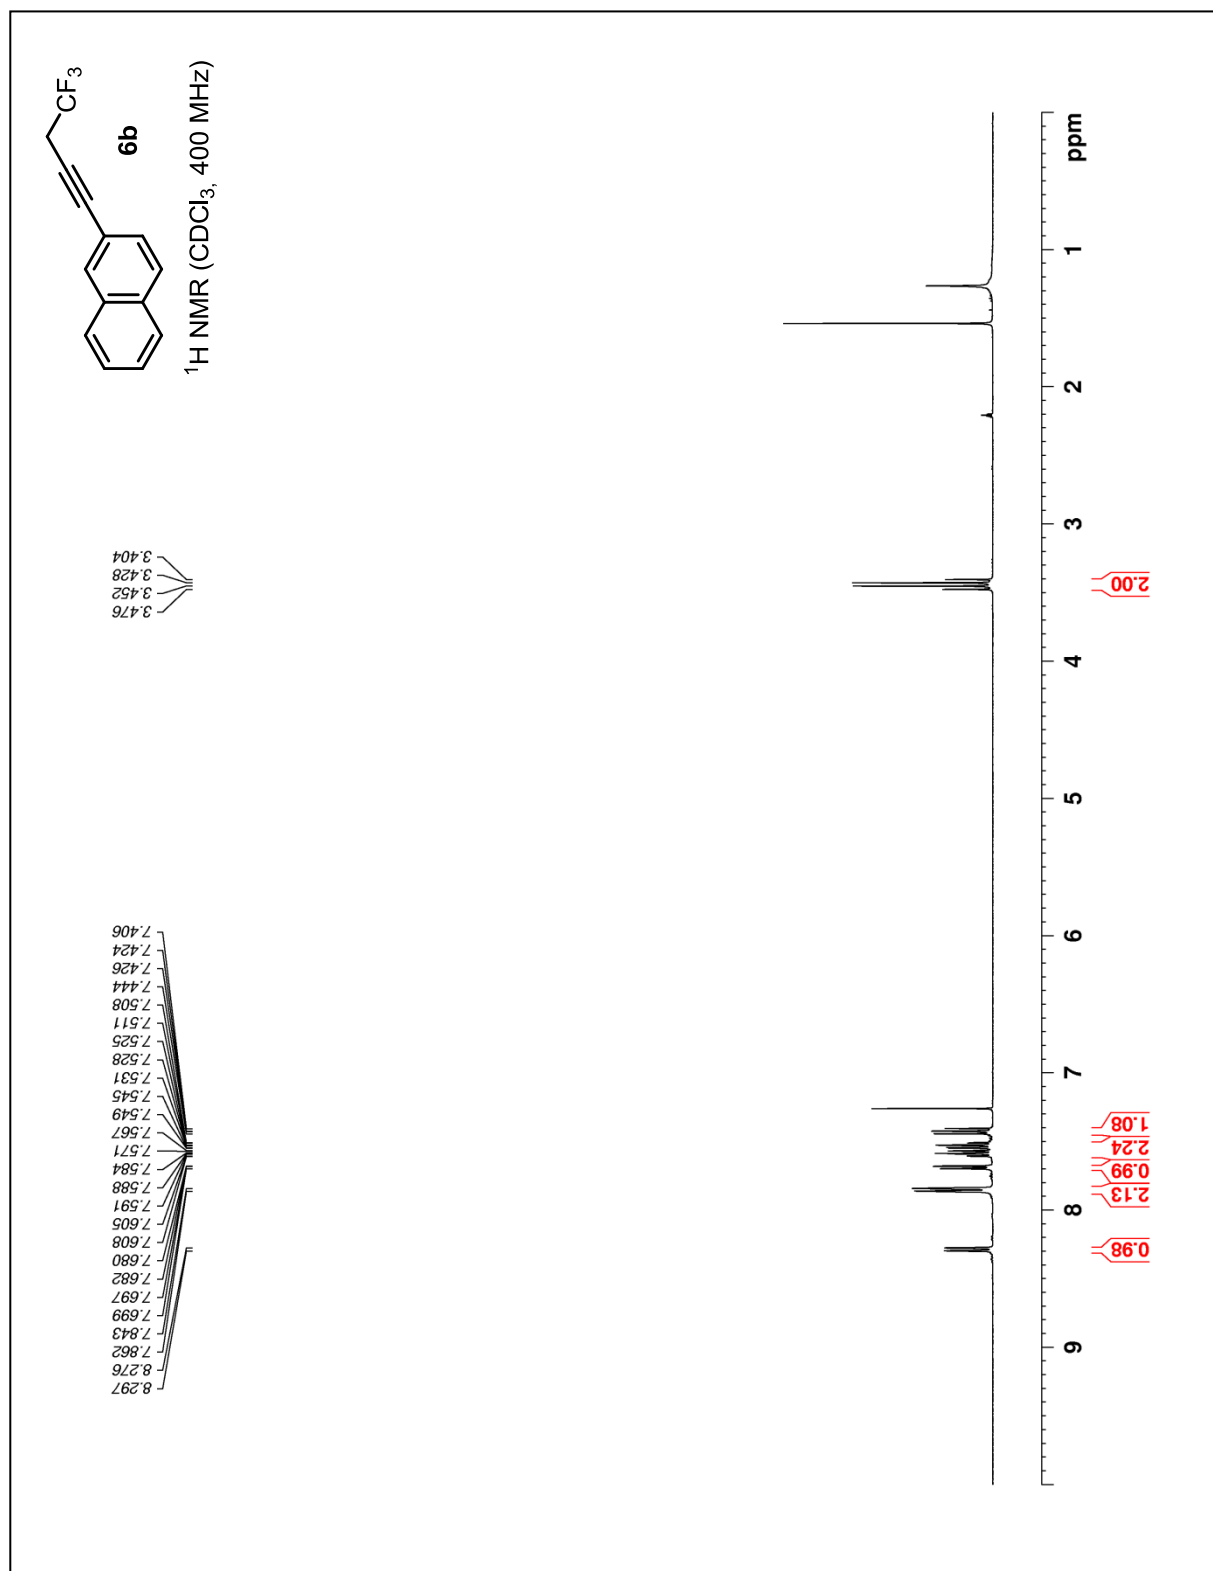

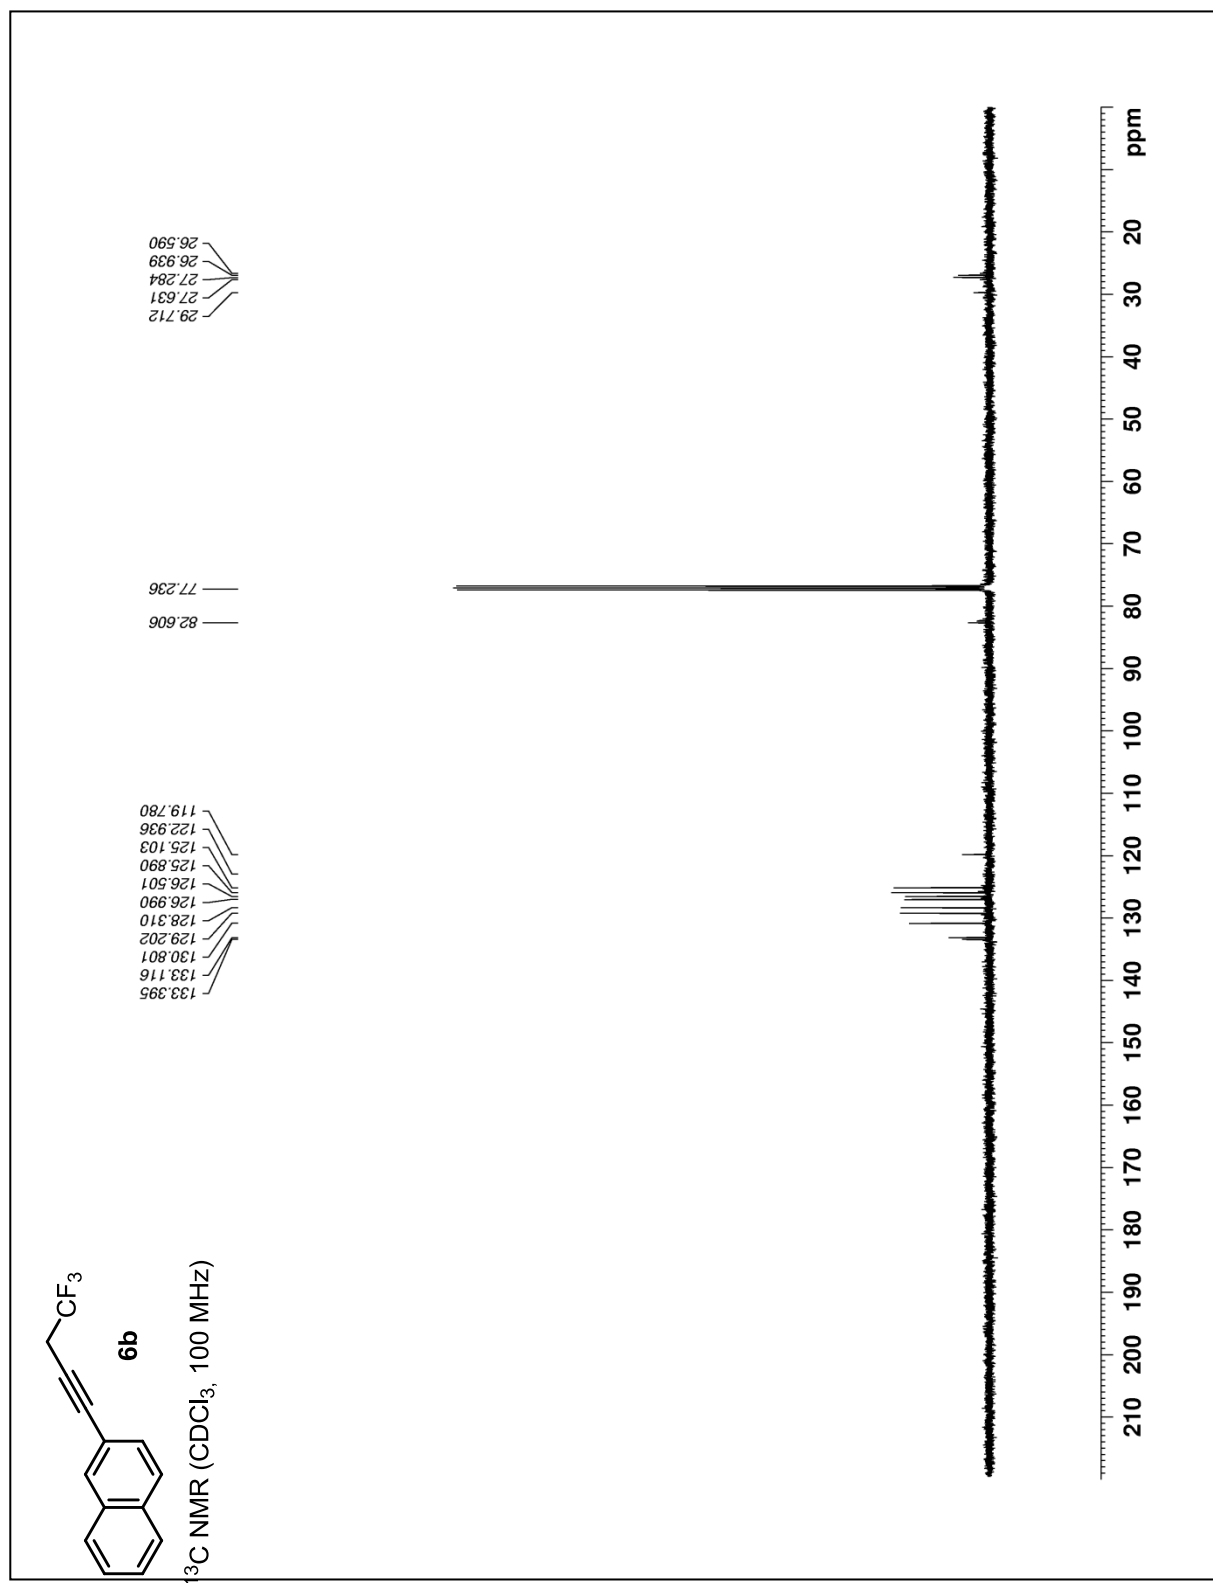



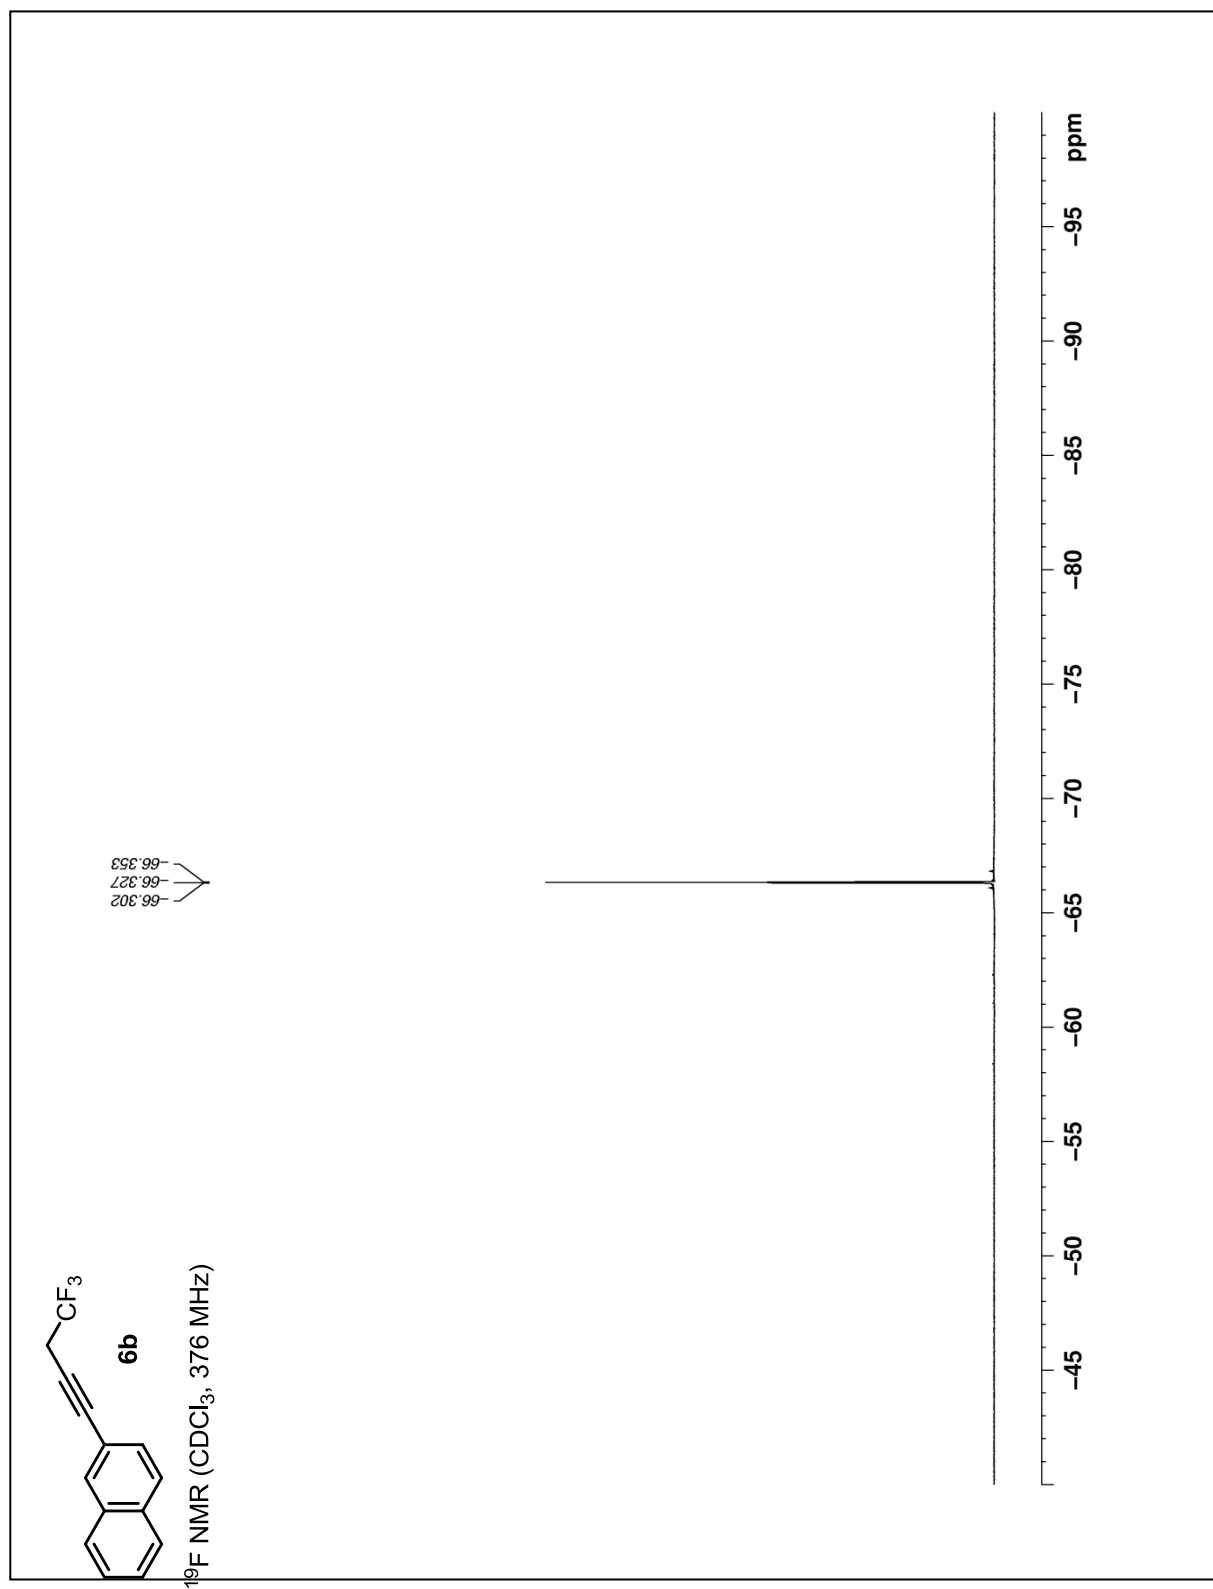

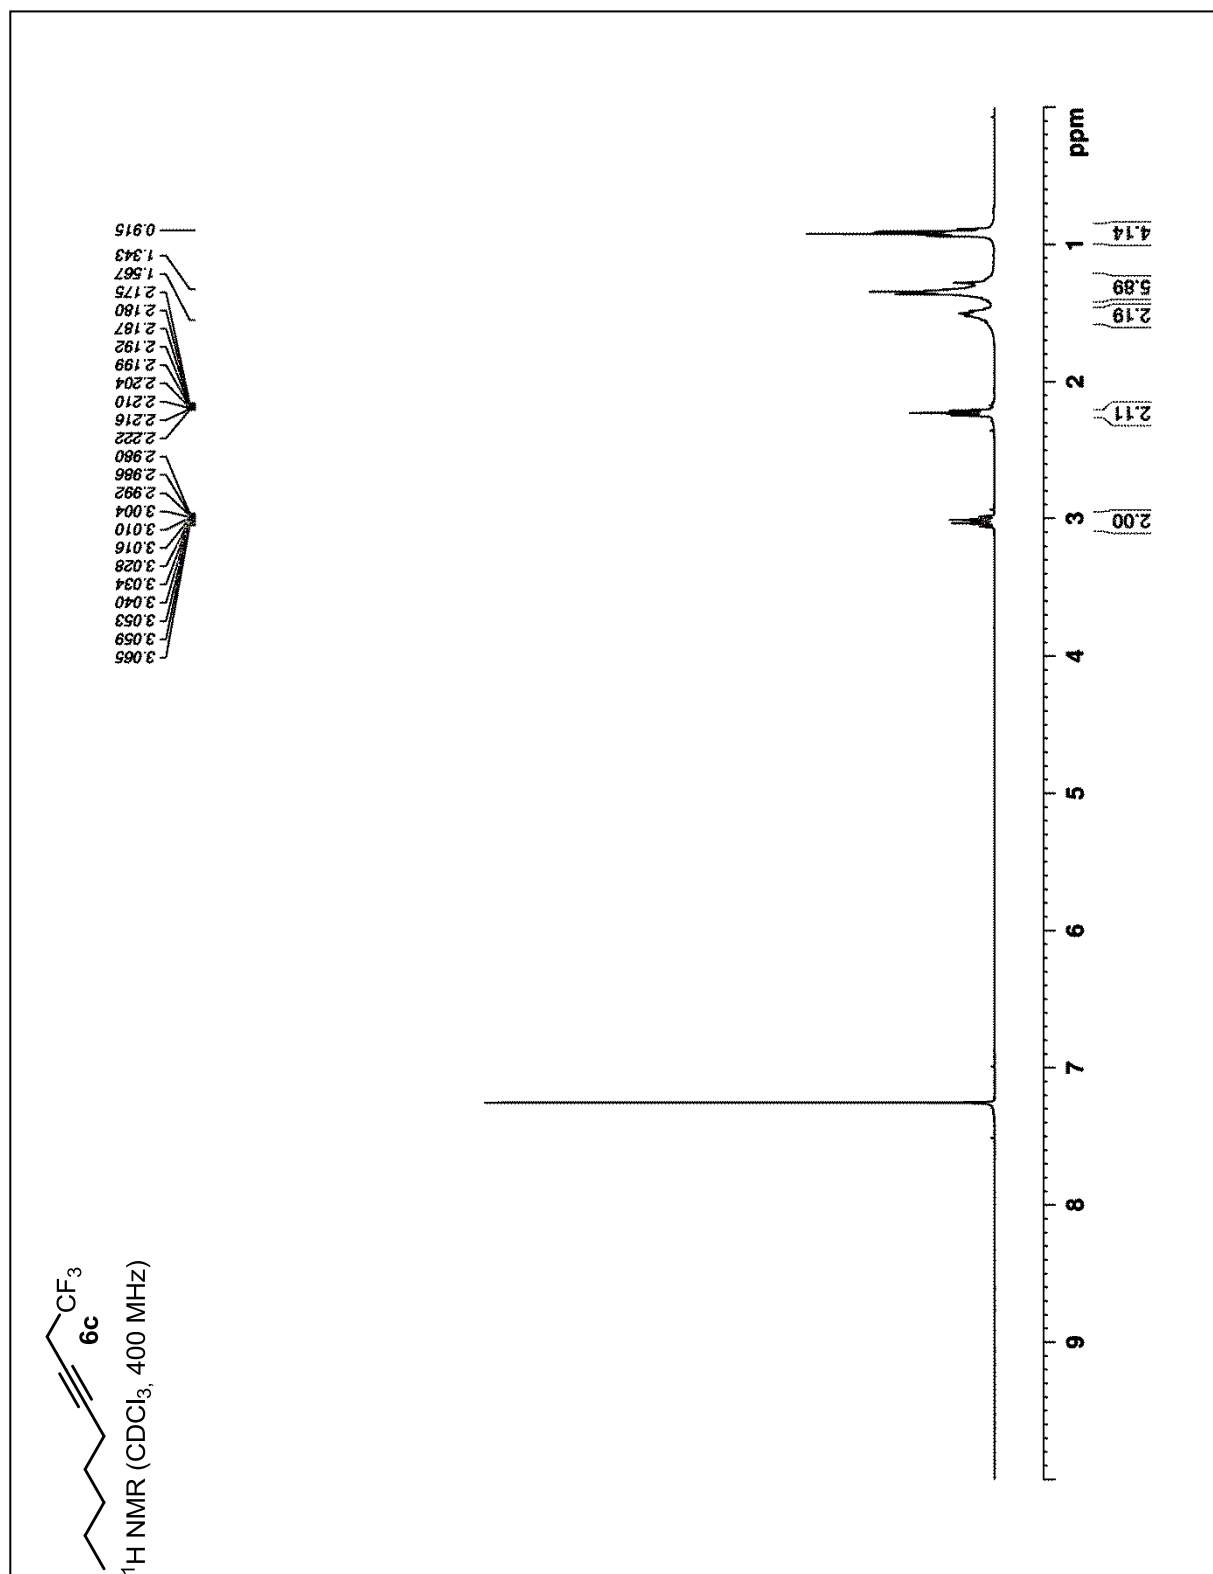

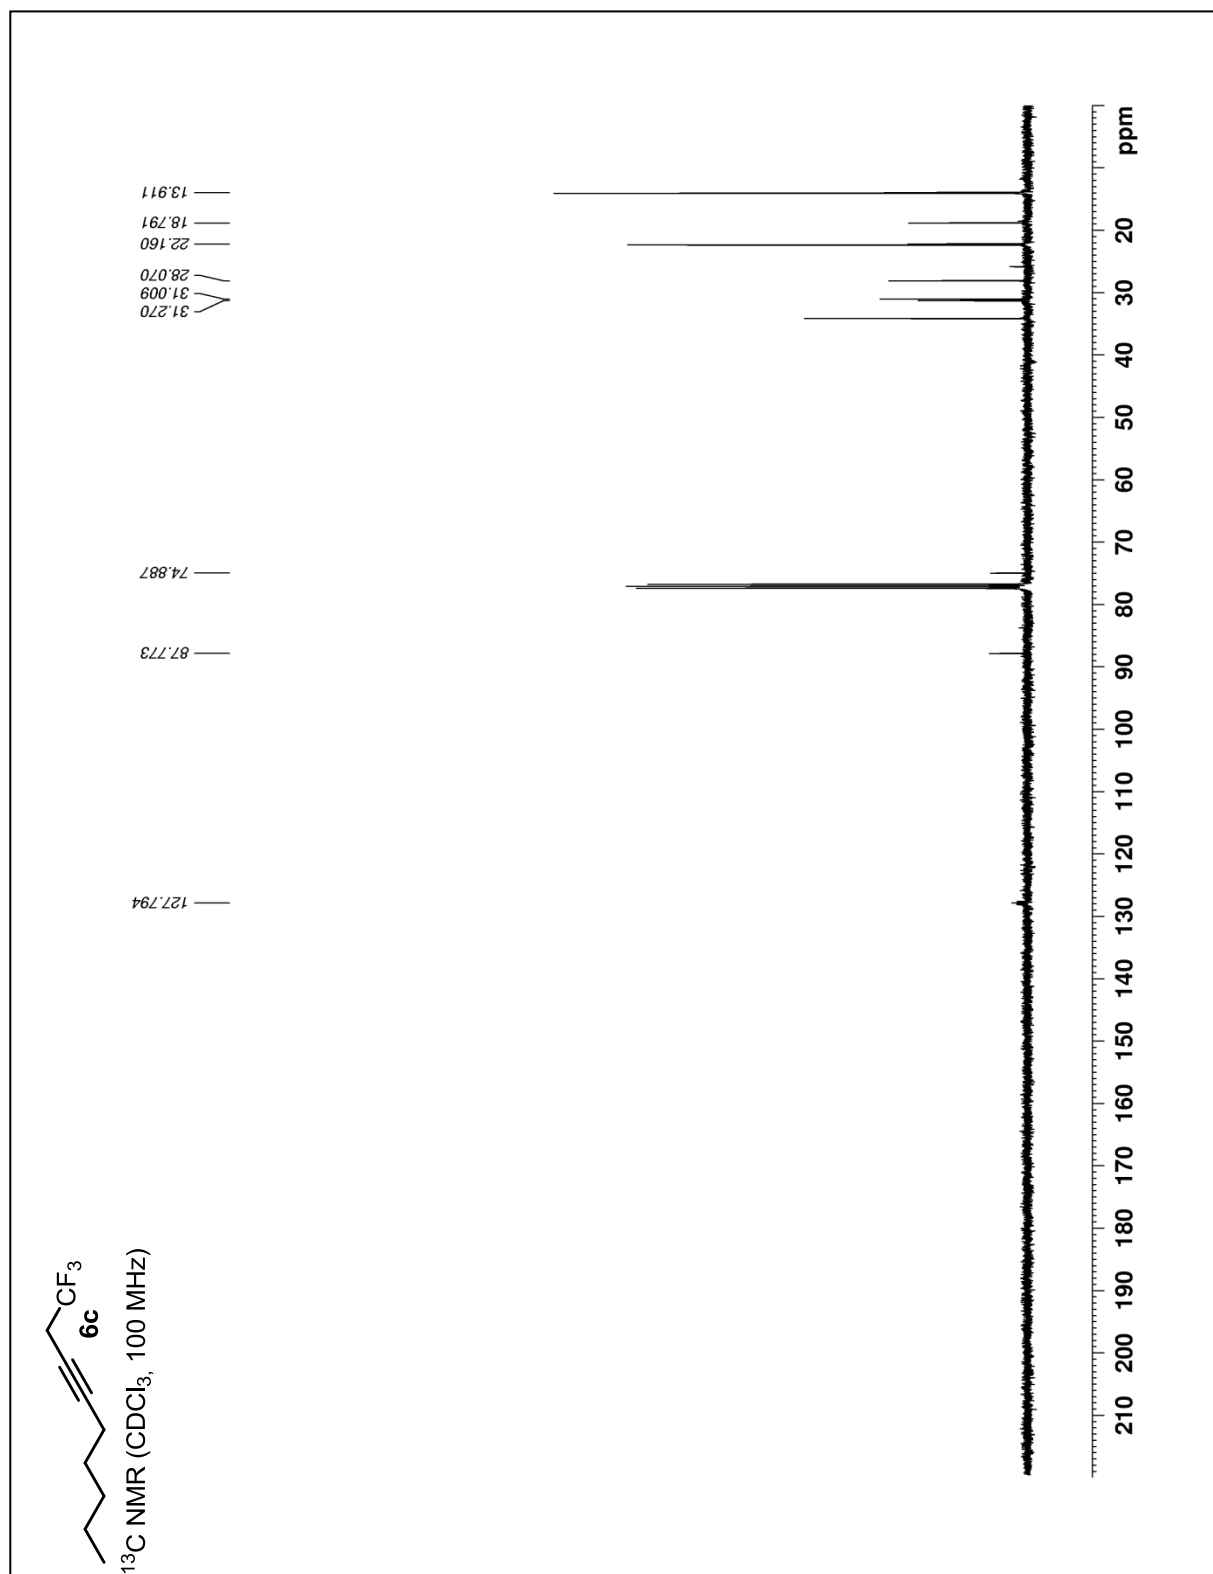

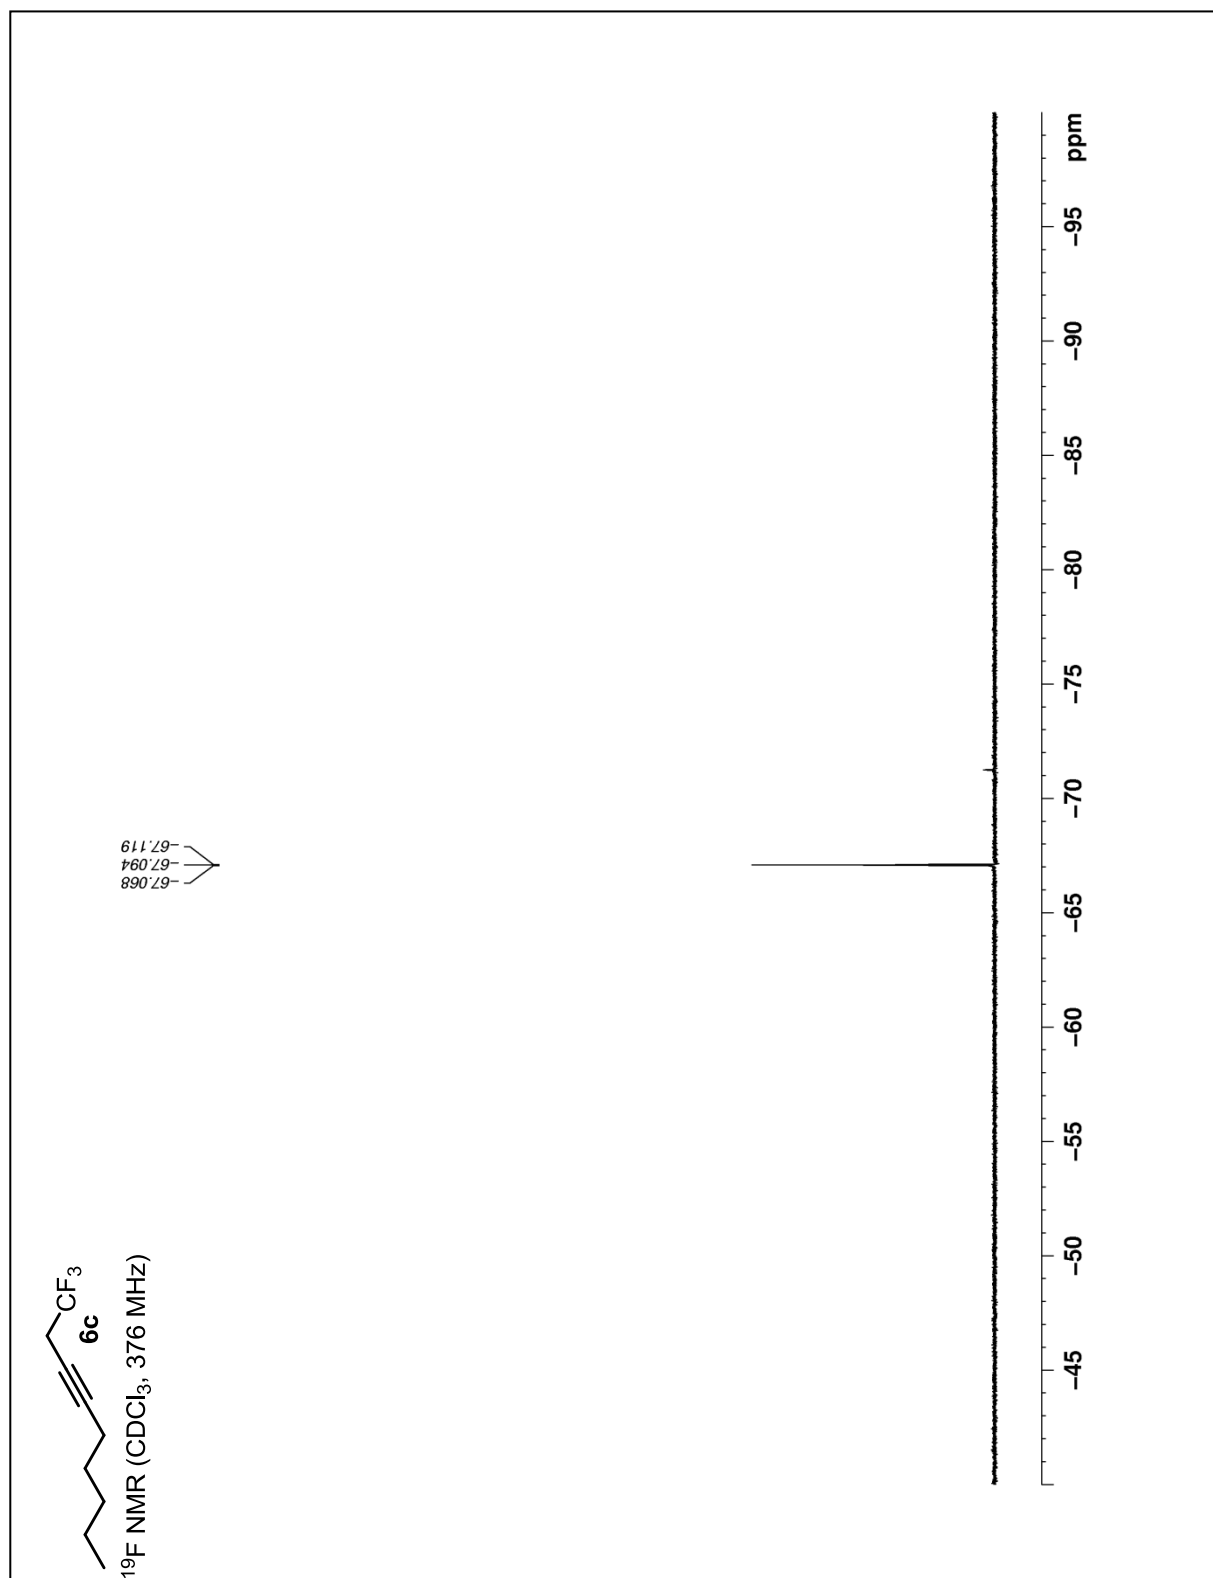

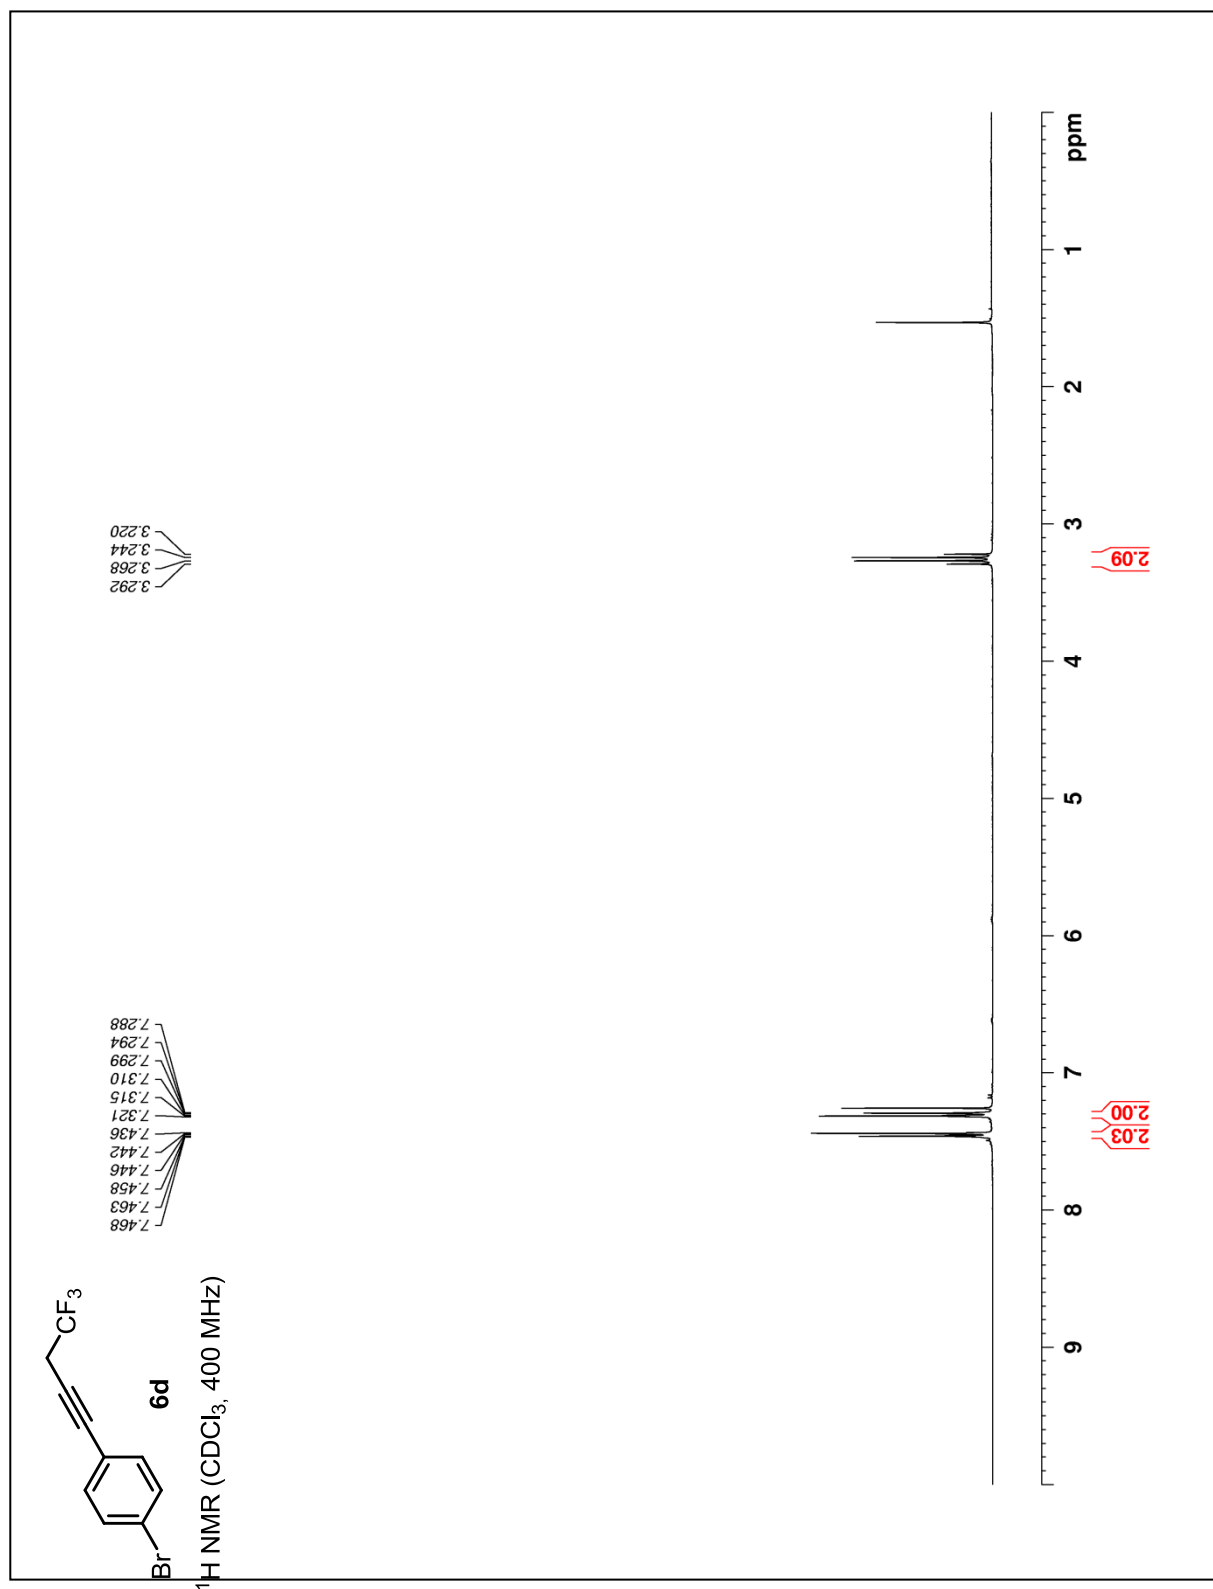

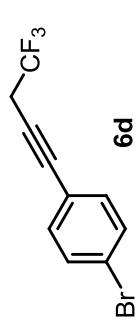

$^{13}\text{C}$  NMR ( $\text{CDCl}_3$ , 100 MHz)

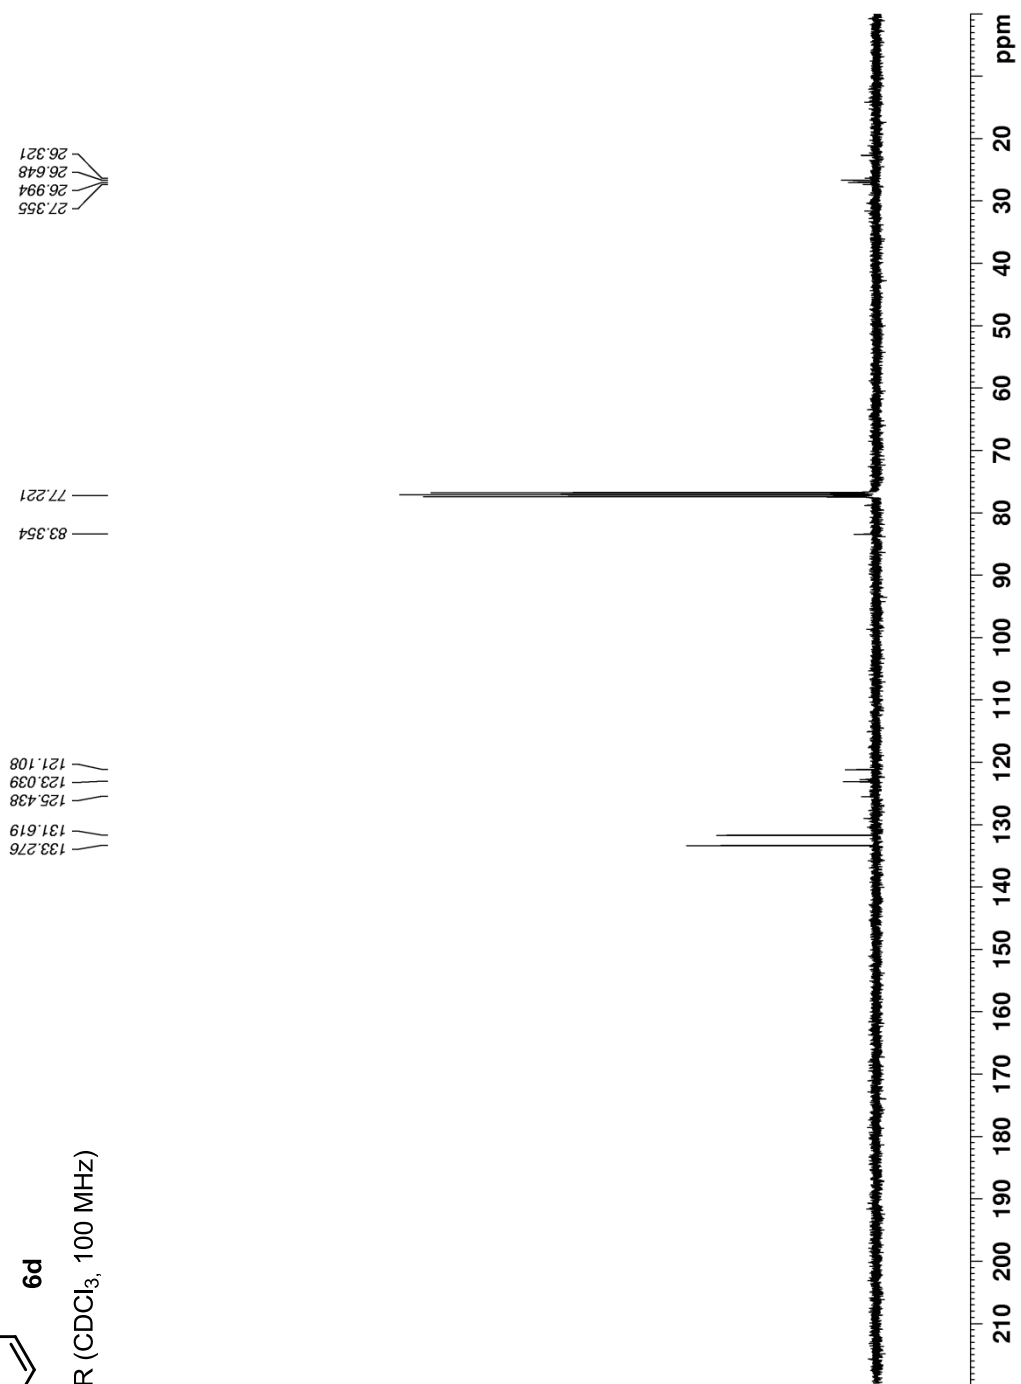

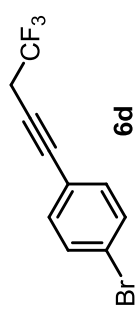

$^{19}\text{F}$  NMR ( $\text{CDCl}_3$ , 376 MHz)

-66.395  
-66.370  
-66.345

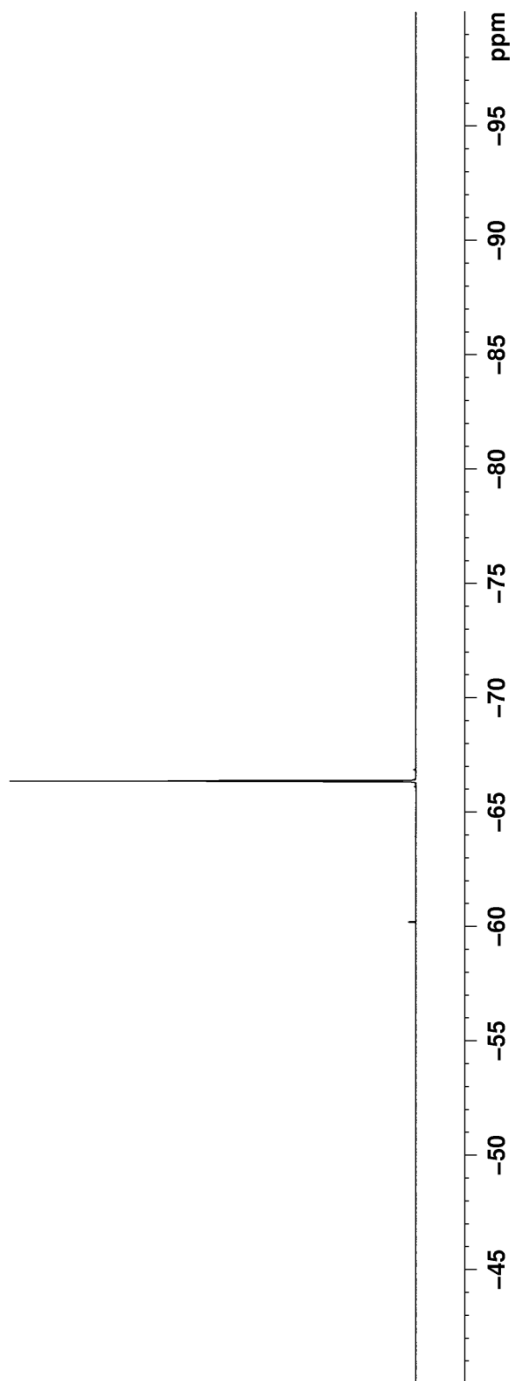

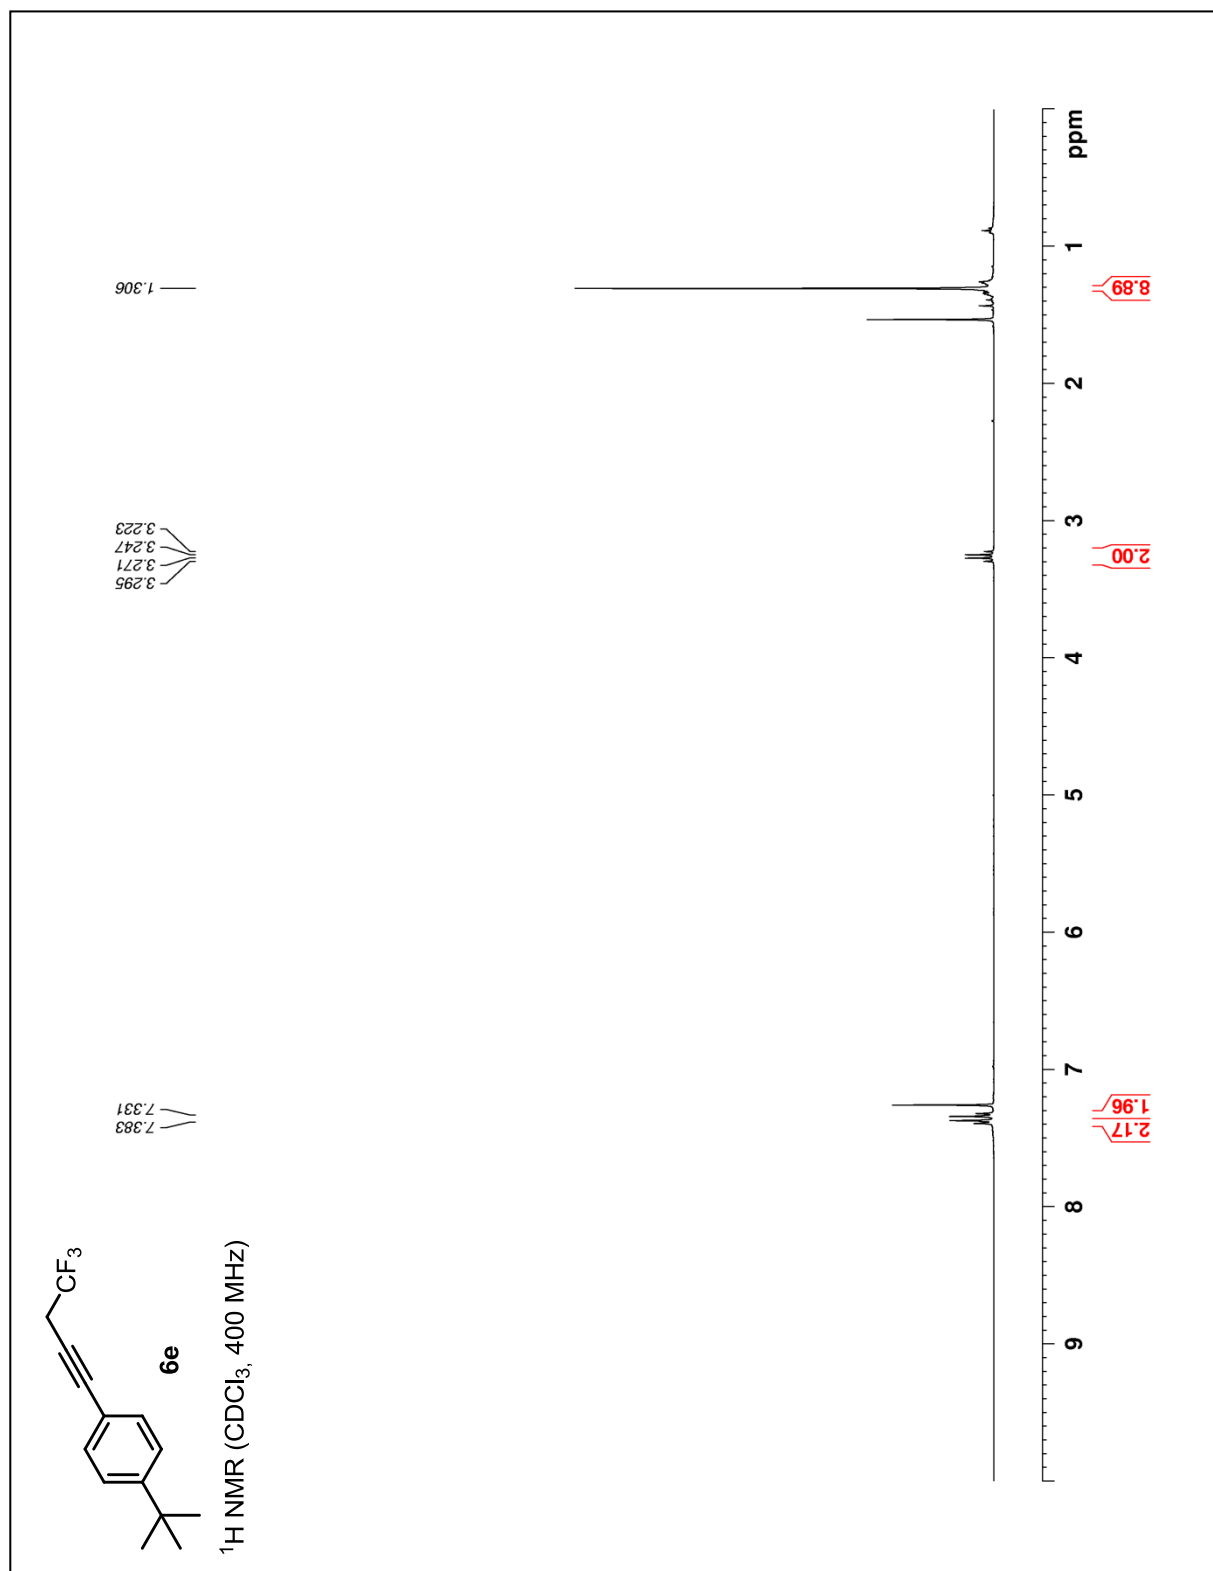



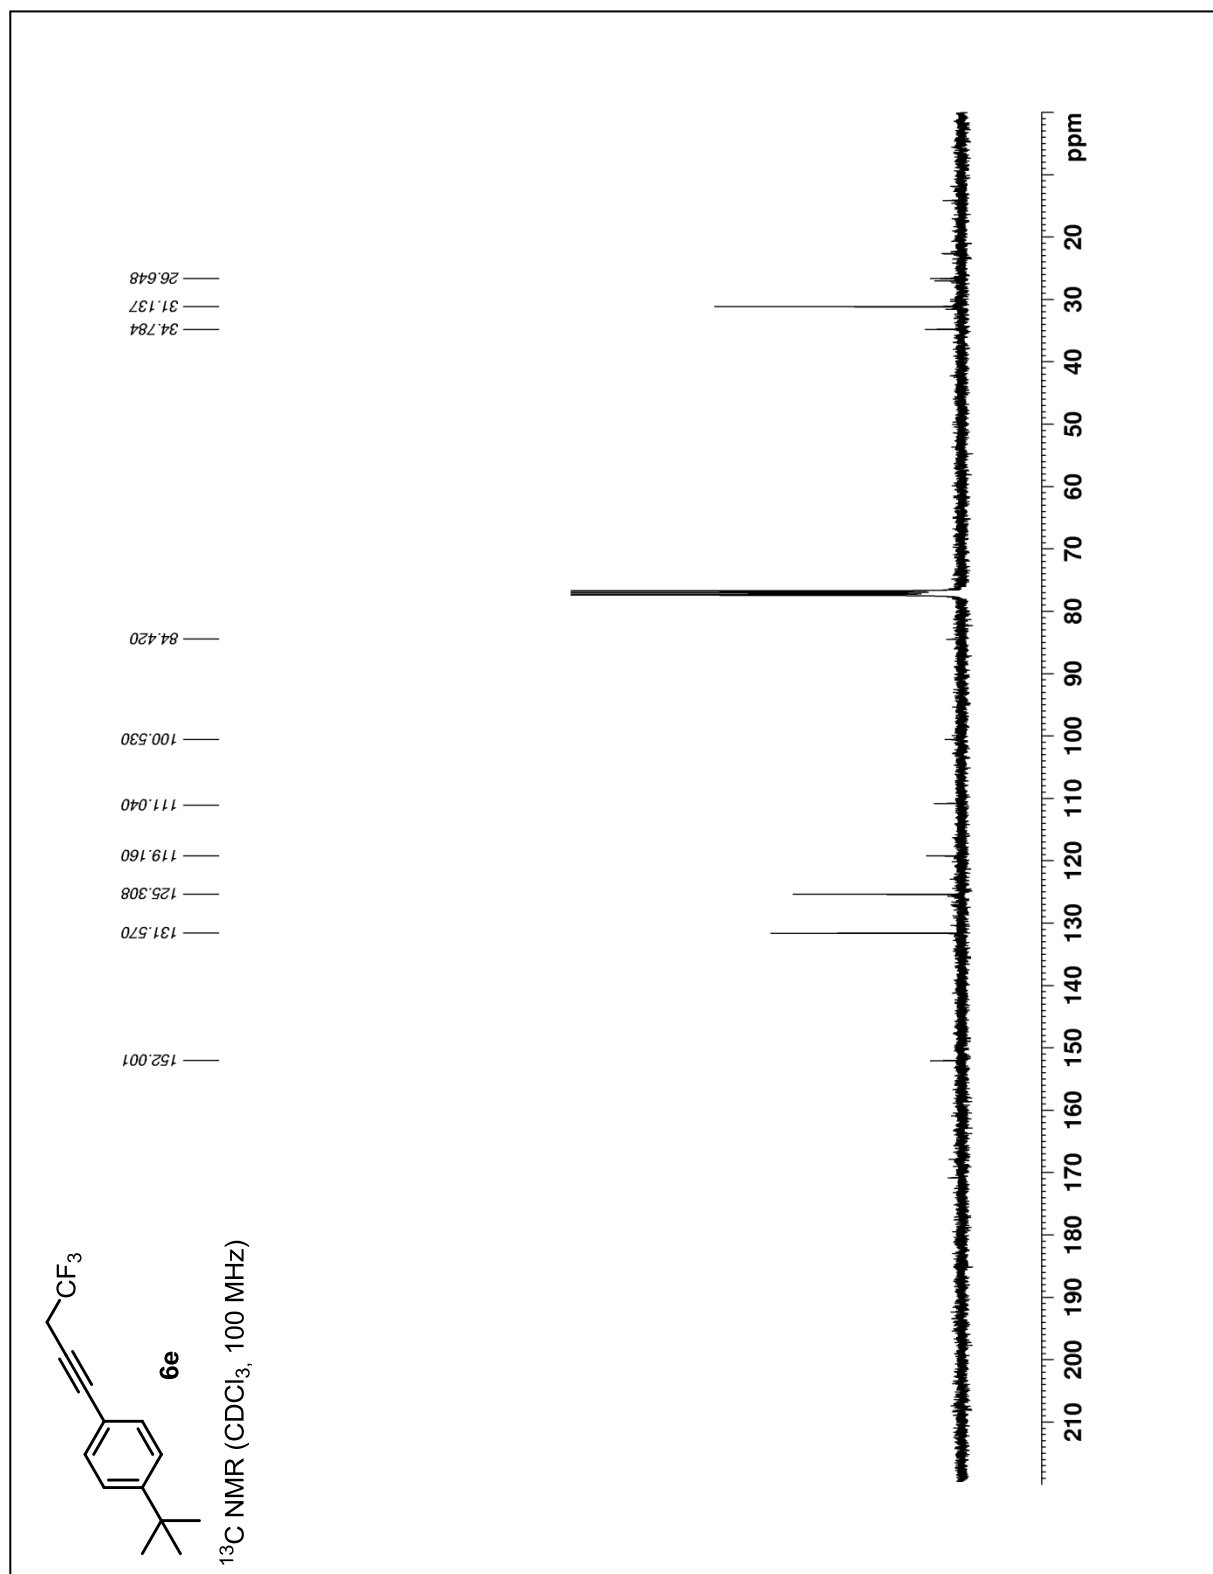

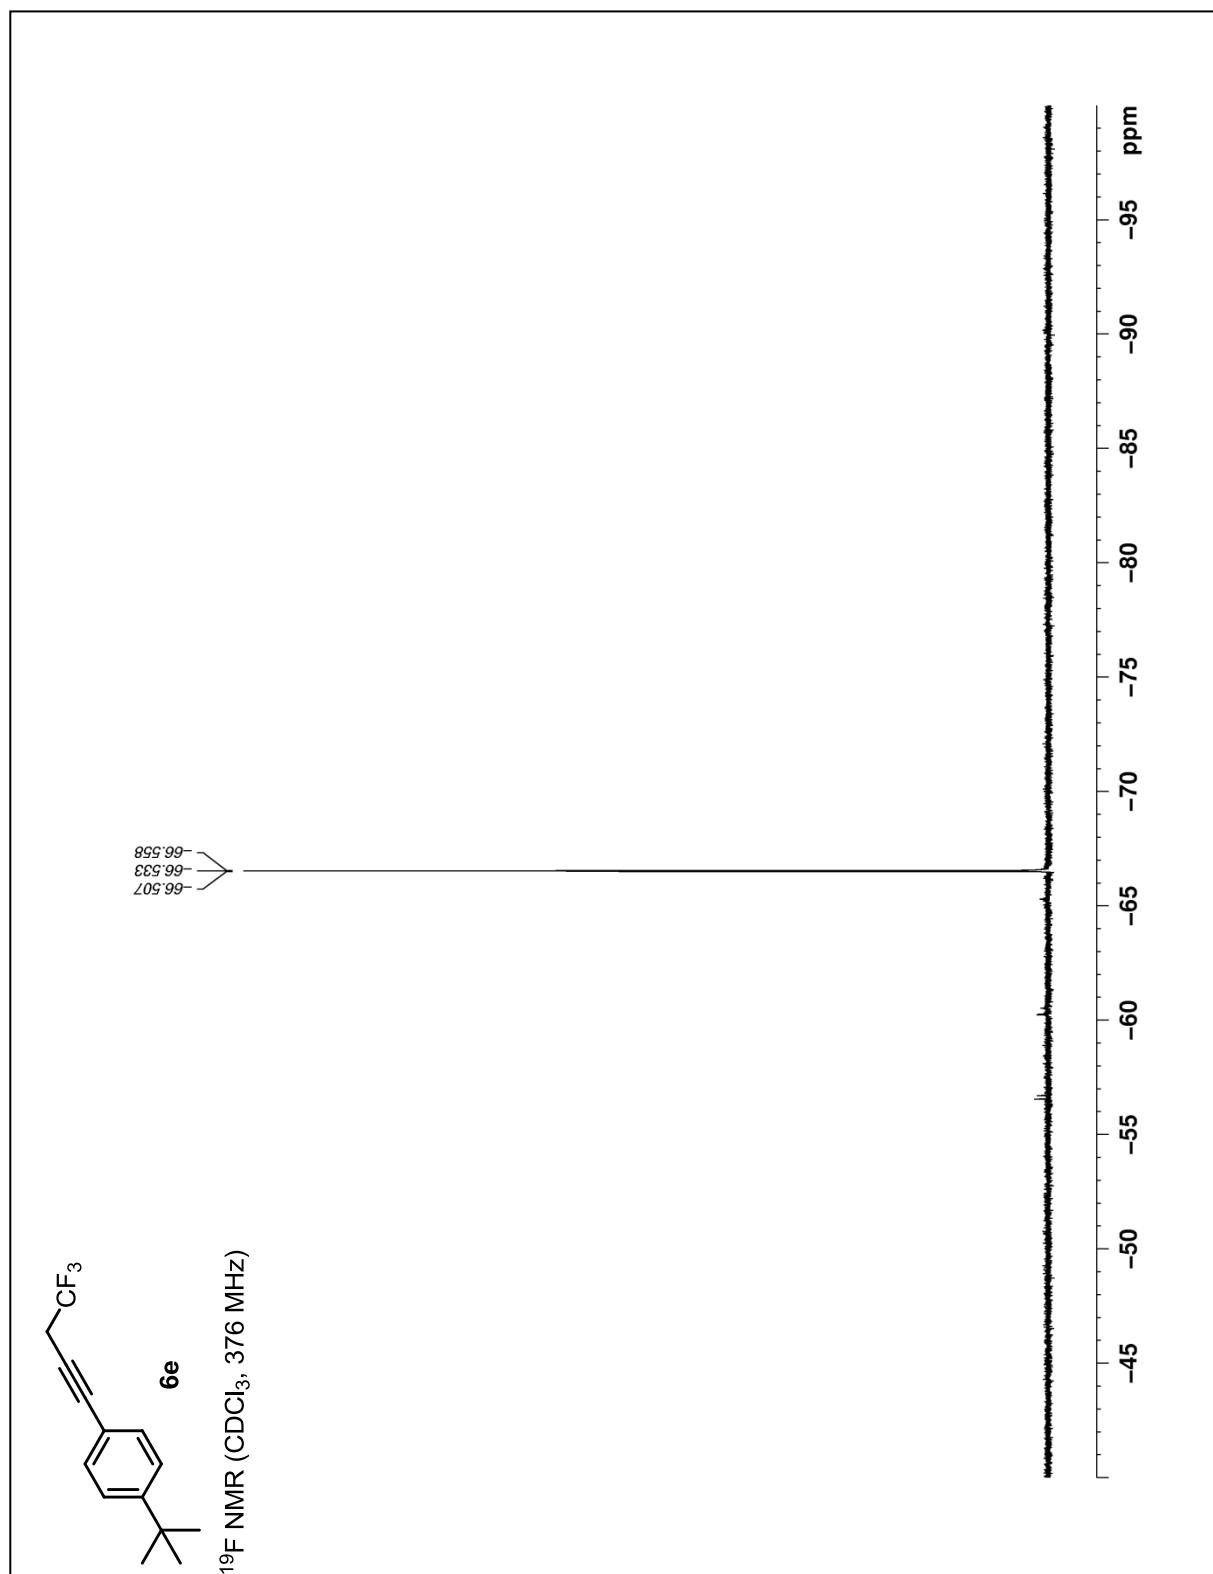

## References

1. Grushin, V. V., Tomashenko, O. A., Escudero-Adán, E. C., Belmonte, M. M.; *Angew. Chem. Int. Ed.*, **2011**, *50*, 7655
2. Stulgies, B.; Prinz, P.; Magull, J.; Rauch, K.; Meindl, K.; Rühl, S.; Meijere, A.; *Chem. Eur. J.*, **2005**, *11*, 308
3. Boisselle, A. P., Hennion, G. F.. *J. Org. Chem.*, **1961**, *3*, 725
4. Davies, P. W., Albrecht, S. J.-C.; *Chem. Commun.*, **2008**, 238
5. Bagley, M. C., Dale, J. W., Ohnesorge, M., Xiong, X., Bower, J.; *J. Comb. Chem.*, **2003**, *5*, 41
6. Yamazaki, T., Yamamoto, T., Ichihara, R., *J. Org. Chem.* **2006**, *71*, 6251.
